# Supplementary material for: Lipin 1 deficiency causes adult-onset myasthenia with motor neuron dysfunction in humans and neuromuscular junction defects in zebrafish
Source: PubMed Central journal article supplement (PMC7806489; doi:10.7150/thno.53330), 2021-01-01
Supplement: thnov11p2788s1.pdf [file thnov11p2788s1.pdf]

## Supplementary materials

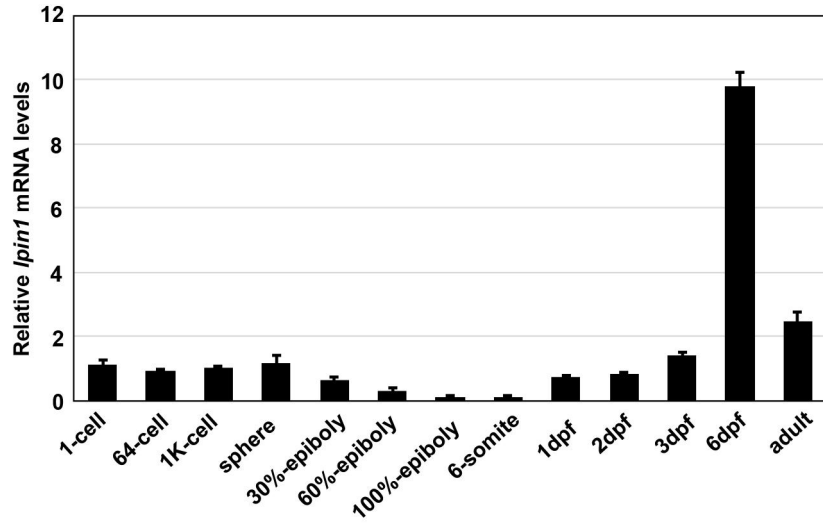

**Figure S1.** qRT-PCR results of *lpin1* transcript levels from 1-cell to adult stages.

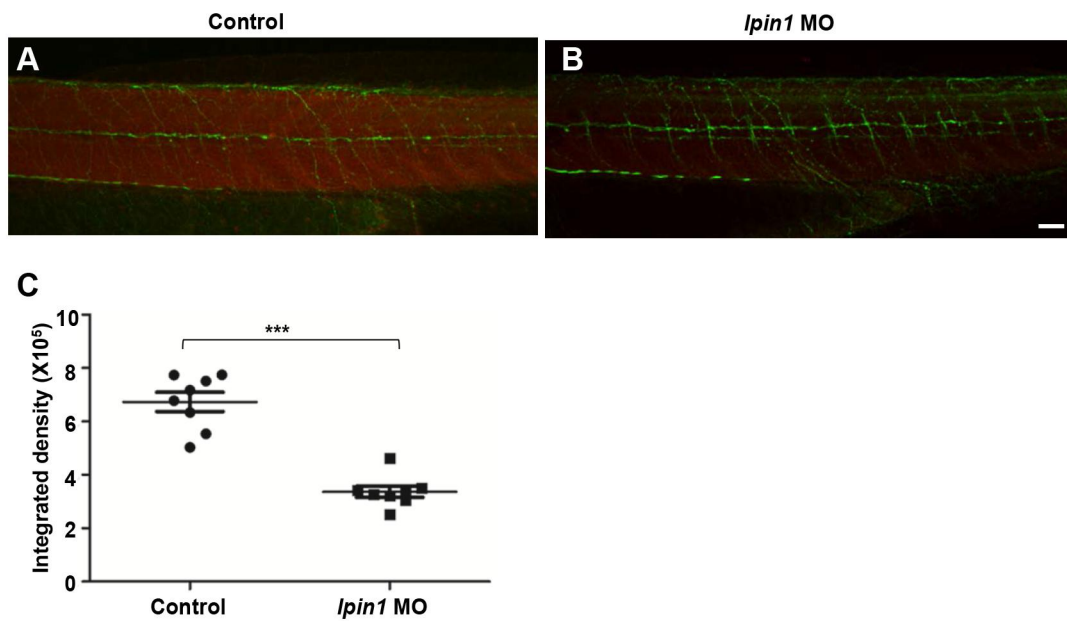

**Figure S2.** The expression of Lpin1 protein in somites. The expression of Lpin1 protein at somites in control embryos (A) was compared to *lpin1* morphants (B) at 24 hpf. (C) Quantification analysis by calculating the integrated density at the selected trunk areas (between somite 5 and 15) of the larvae further revealed a significantly decreased expression of Lpin1 protein in *lpin1* morphants (n=8 for each group). \*\*\* indicates  $p < 0.001$  by Student's t-test. Scale bar: 100  $\mu\text{m}$ .

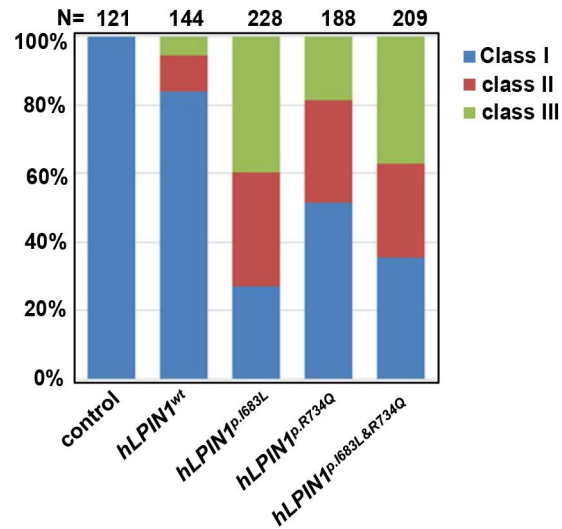

**Figure S3.** *LPIN1* mutant mRNAs affect skeletal muscle formation at 4 dpf. Overexpression of *hLPIN1*<sup>I683L</sup>, *hLPIN*<sup>R734Q</sup>, or *hLPIN1*<sup>I683L & R734Q</sup>, not *hLPIN1*<sup>wt</sup> mRNA caused overall reduction in birefringence of the skeletal muscle.

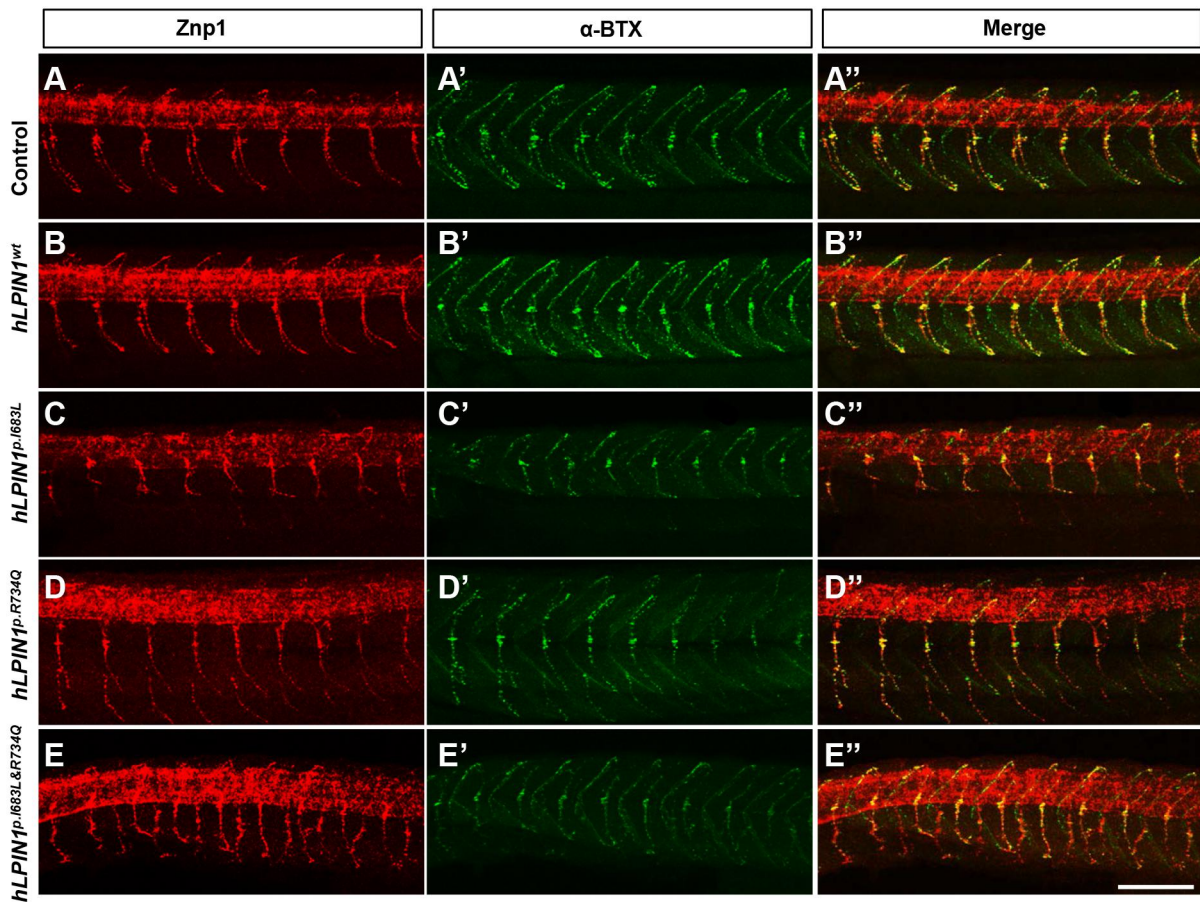

**Figure S4.** *LPIN1* mutant mRNAs affect PMNs development and AChR clustering in zebrafish embryos. Znp1 antibody staining (A, B, C, D, E) and  $\alpha$ -BTX labeling (A', B', C', D', E') at 26 hpf. Control (A-A'') and *lpin1<sup>wt</sup>* injected embryos (B-B'') exhibited normal PMNs outgrowth and post-synapse patterning. In embryos injected with *hLPIN1<sup>1683L</sup>* (C-C''), *hLPIN1<sup>R734Q</sup>* (D-D''), or *hLPIN1<sup>1683L&R734Q</sup>* (E-E''), PMNs outgrowth and post-synapse patterning were abnormal. Scale bar: 100  $\mu$ m.

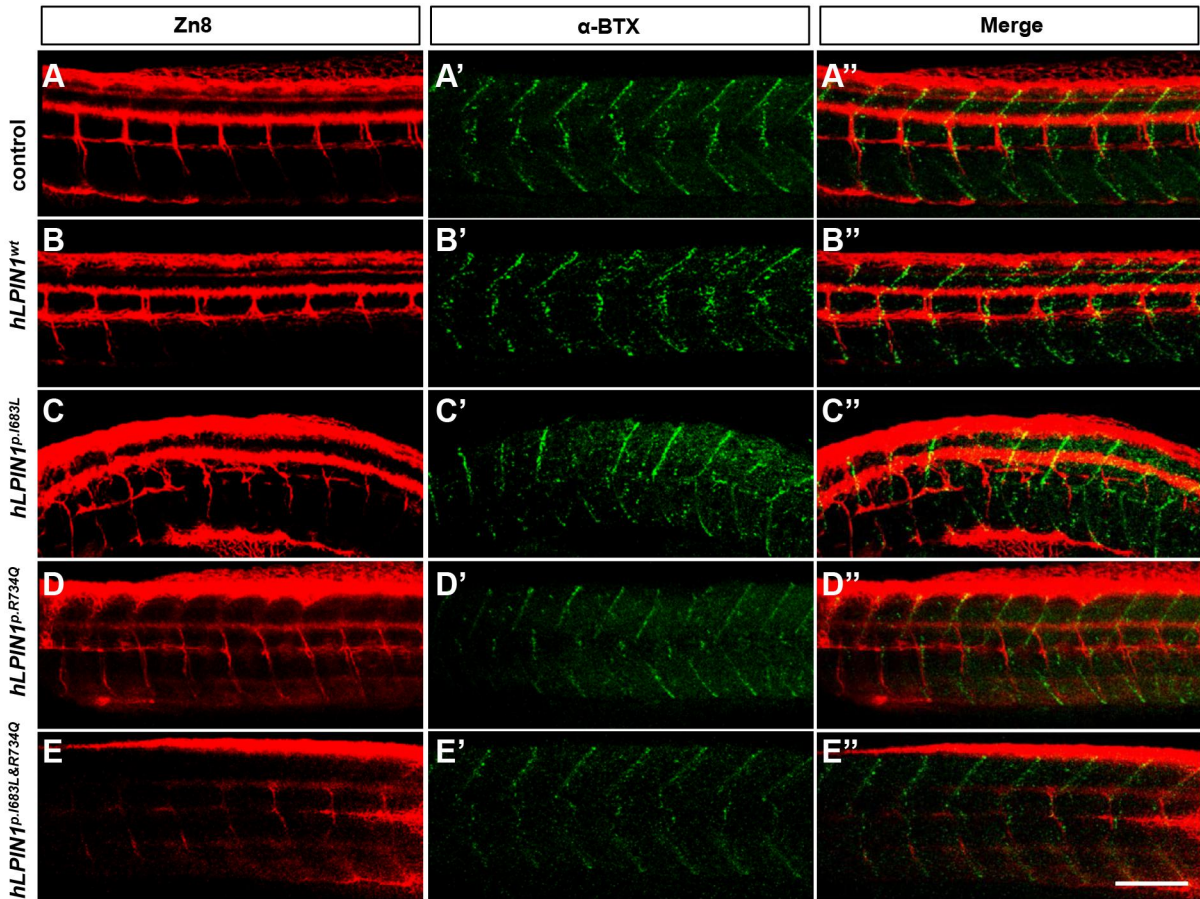

**Figure S5.** *LPIN1* mutant mRNAs affect SMNs development and AChR clustering in zebrafish embryos. Zn8 antibody staining (A, B, C, D, E) and  $\alpha$ -BTX labeling (A', B', C', D', E') at 60 hpf. Control (A-A'') and *lpin1<sup>wt</sup>* injected embryos (B-B'') exhibited normal SMNs outgrowth and post-synapse patterning. In embryos injected with *hLPIN1<sup>1683L</sup>* (C-C''), *hLPIN1<sup>R734Q</sup>* (D-D''), or *hLPIN1<sup>1683L&R734Q</sup>* (E-E''), SMNs outgrowth and post-synapse patterning were abnormal. Scale bar: 100  $\mu$ m.

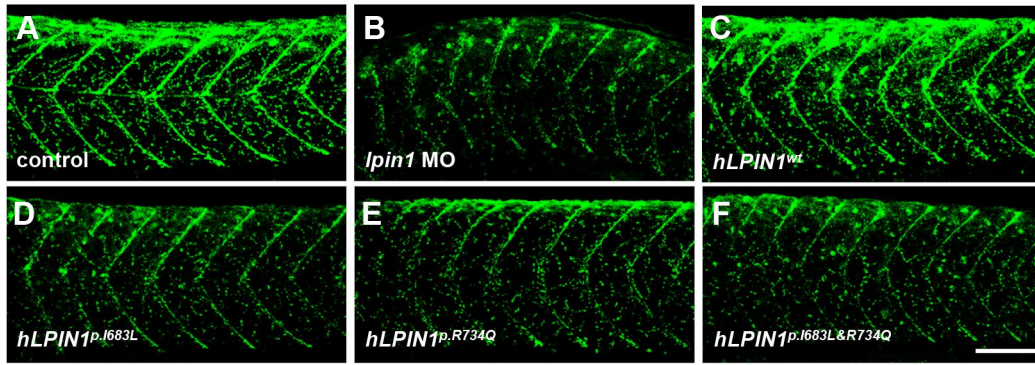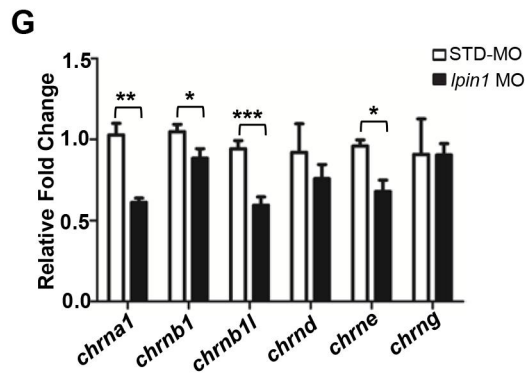

**Figure S6.** (A-F) AChRs clusters stained by  $\alpha$ -BTX in *lpin1* MOs and *hLPIN1* mRNAs injected embryos at 5 dpf, lateral view, scale bar: 100  $\mu$ m. (G) The expressions of nicotinic AChRs subunits markers, as determined by qRT-PCR, were significantly changed in *lpin1* morphants at 5 dpf.

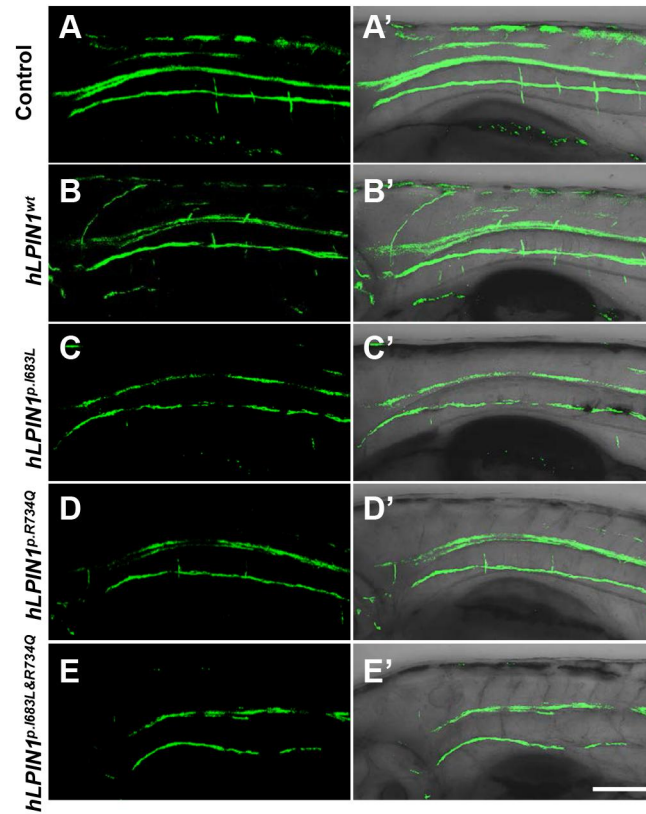

**Figure S7.** GFP signals of 5 dpf *Tg(mbp:eGFP)* larvae was visualized by fluorescent microscope when injected with different *hLPIN1* mRNAs, lateral view, scale bar: 100  $\mu$ m.

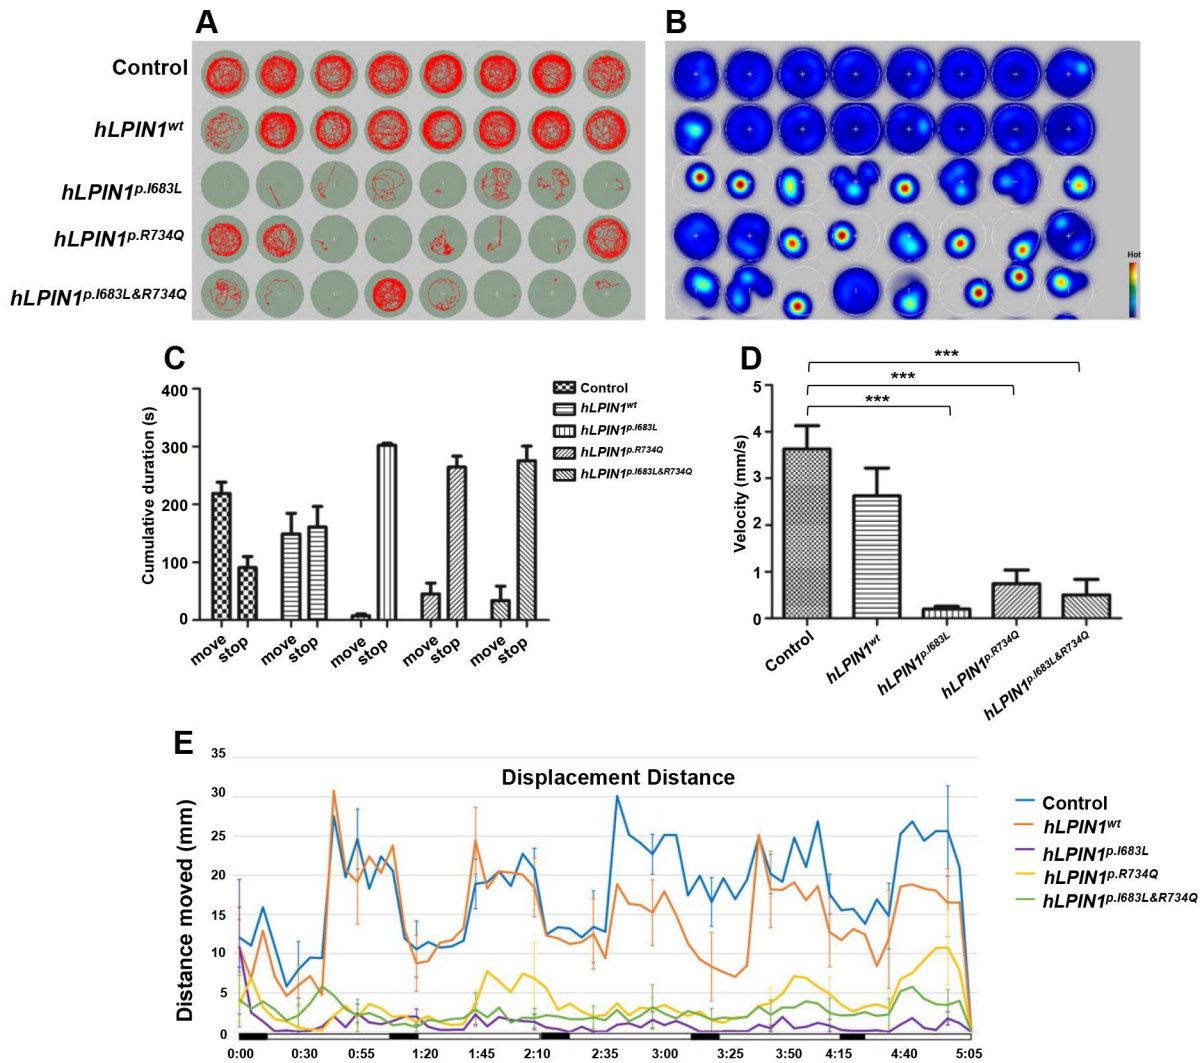

**Figure S8.** Locomotor deficits in the zebrafish larvae injected with mutant *LPIN1* mRNA. (A) The significant reduction in movement was observed in the zebrafish larvae injected with *hLPIN1<sup>I683L</sup>*, *hLPIN<sup>R734Q</sup>* and *hLPIN1<sup>I683L&R734Q</sup>* respectively, compared to the control embryos and the *hLPIN1<sup>wt</sup>*-injected larvae. Total movement was shown for a 5 min recording epoch. (B) Heat map plots where the activity levels of movement were represented by the intensity of blue color. Red dots indicated the long rest time without any movement. (C) Cumulative duration records showed that the larvae injected with the mRNA of *hLPIN1<sup>I683L</sup>*, *hLPIN<sup>R734Q</sup>* and *hLPIN1<sup>I683L&R734Q</sup>* respectively exhibited poor activity. (D) Velocity was dramatically decreased in the zebrafish larvae injected with *hLPIN1<sup>I683L</sup>*, *hLPIN<sup>R734Q</sup>* or *hLPIN1<sup>I683L&R734Q</sup>*



but not *hLPIN1<sup>wt</sup>*; as compared to uninjected controls. (E) Total distance travelled during a 5 min startle response analysis as follows: 20 s spontaneous movement tracking followed by cycle stimulation with light on 5 s, interval 1 s, trigger tap 1 s, and interval 48 s; repeated 5 cycles. Data shown are means of distance moved in 5 s  $\pm$  SE (n=8 for each group of larva at 5 dpf). Assays were carried out in flat-bottom 48-well plates.

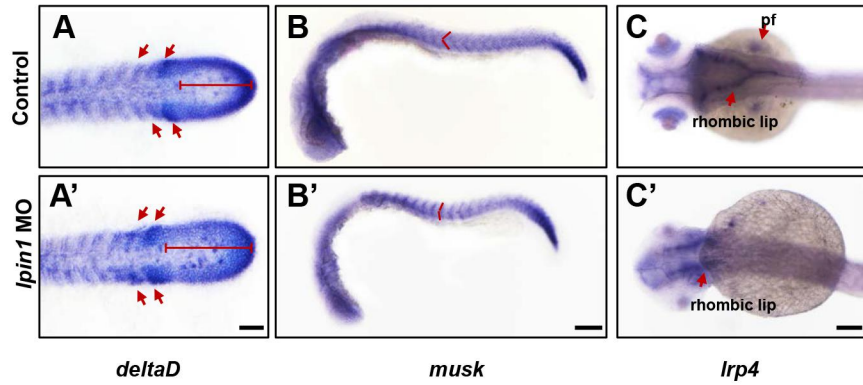

**Figure S9.** The expression of *deltaD*, *musk*, *lrp4* were affected in *lpin1* morphants. The expression of somite marker *deltaD* in control embryos (A) and *lpin1* morphant (A') embryos at 8-somite stage. Red arrows indicate newly formed somites and red bars indicate the length of presomitic mesoderm (psm). Control embryos (B) and *lpin1* morphant (B') embryos at 25 hpf were stained for *musk*. The expression of *lrp4* (C, C') in rhombic lip and pectoral fin was reduced in *lpin1* morphants at 50 hpf.

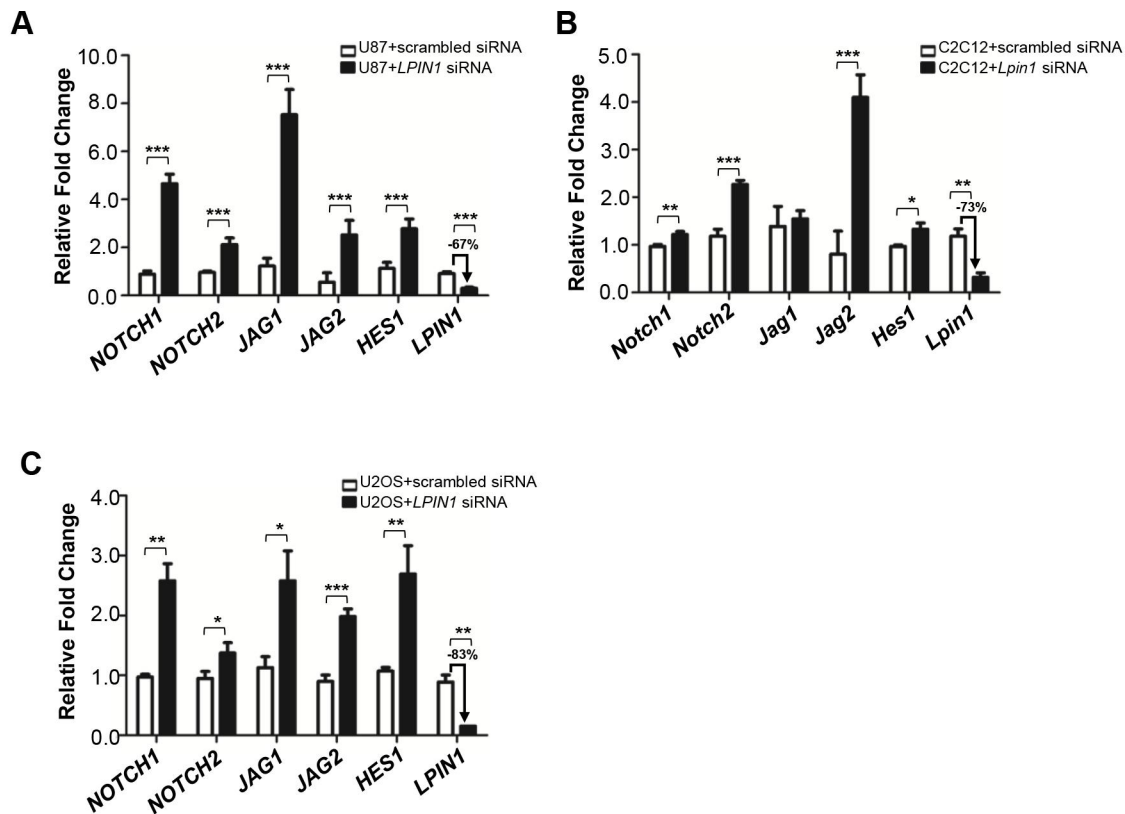

**Figure S10.** *LPIN1* knockdown in different cell lines triggered abnormal NOTCH activation. (A) *LPIN1* siRNA in human primary glioblastoma U87 cells achieved 67% knockdown efficiency with significantly upregulated expressions of NOTCH signaling components. (B) *LPIN1* siRNA in mouse myoblast C2C12 cells achieved 73% knockdown efficiency with significantly upregulated expressions of NOTCH signaling components. (C) *LPIN1* siRNA in human osteosarcoma U2OS cells achieved 83% knockdown efficiency with significantly upregulated expressions of NOTCH signaling components. Values in (A-C) represent means  $\pm$  SE of data from three independent experiments, \* $p < 0.05$ , \*\* $p < 0.01$ , and \*\*\* $p < 0.001$  (Student's t-test).

**Supplementary Table S1: List of all primers, morpholino sequences,  
siRNAs sequences**

**Genomic DNA primer sequences**

| Gene  | Exon | Forward              | Reverse              |
|-------|------|----------------------|----------------------|
| LPIN1 | E17  | TGTCACCACGCAGTACCAAG | CACCAGAATTCGAACCGTGC |
|       | E19  | GAGTACAAGGGGCTCAAGCG | GGAAGAGAGCGGGTCTGAAC |

**Morpholino sequences**

| Name              | sequence                 |
|-------------------|--------------------------|
| <i>lpin1</i> - MO | ATATTCTGTTTGTCTGACCTGCTG |

**siRNAs sequences**

| Gene name         | Forward               | Reverse                |
|-------------------|-----------------------|------------------------|
| LPIN1-Human-siRNA | GGAGAUAAUGGAGAAGCAUTT | AUGCUUCUCCAUAUAUCUCCTT |
| Lpin1-Mouse-siRNA | GCAUCGACAUCAUUGUCAUTT | AUGACAAUGAUGUCGAUGCTT  |

**Human cDNA primer sequences used for Quantitative PCR**

| Gene Name      | Forward                | Reverse                 |
|----------------|------------------------|-------------------------|
| <i>LPIN1</i>   | TGGGTGTTTGCAATACAAAGG  | GCTCCTTCACGGTGACAAA     |
| <i>LRP4</i>    | GTTCCAATGACGCTGTTTCT   | CCAATGGCGTAGCTGATATG    |
| <i>AXIN2</i>   | GCTGACGGATGATTCCATGT   | ACTGCCACACGATAAGGAG     |
| <i>PAX2A</i>   | CACTTGCGAGCTGACACCTT   | TGCAGATAGACTCGACTTGACTT |
| <i>MPZ</i>     | CATCGTGGTTTACACCGACAG  | TGGAAGATCGAAATGGCATCTCT |
| <i>ACHE</i>    | CCTGTCCTCGTCTGGATCTATG | AAGAAGCGGCCATCGTACAC    |
| <i>ISL1</i>    | AAGGACAAGAAGCGAAGCAT   | TTCCTGTCATCCCCTGGATA    |
| <i>CHAT</i>    | GGAGCCTGAGCACGTCAT     | CGGAAATTAATGACAACATCCA  |
| <i>NEUROD1</i> | ATGACCAAATCGTACAGCGAG  | GTTTATGGCTTCGAGGTCGT    |
| <i>NOTCH1</i>  | GGCAATCCGAGGACTATGAG   | CTCAGAACGCACTCGTTGAT    |
| <i>NOTCH2</i>  | TGGTGGCAGAACTGATCAAC   | CTGCCAGTGAAGAGCAGAT     |
| <i>JAG1</i>    | GAATGGCAACAAAACCTTGCAT | AGCCTTGTCGGCAAATAGC     |
| <i>JAG2</i>    | TCATCCCCTTCCAGTTCG     | ATGCGACACTCGCTCGAT      |
| <i>HES1</i>    | GAAGCACCTCCGGAACCT     | GTCACCTCGTTCATGCACTC    |
| <i>ACTIN</i>   | ATCAAGATTGCTCCTCCTGAG  | CTGCTTGCTGATCCACATCTG   |

### Mouse cDNA primer sequences used for Quantitative PCR

| Gene Name     | Forward                 | Reverse                 |
|---------------|-------------------------|-------------------------|
| <i>Lpin1</i>  | GACGGTGAAGGAGCTCTACA    | ATGCTTCTCCGTTGTCTCCC    |
| <i>Moyg</i>   | GAGACATCCCCCTATTTCTACCA | GCTCAGTCCGCTCATAGCC     |
| <i>Acta1</i>  | ACCGGGAGAAGATGACTCAA    | CCACGCTCAGTGAGGATTTT    |
| <i>Acta2</i>  | CGCCATGTATGTGGCTATTTCAG | CTTGATGTCACGGACAATCTC   |
| <i>Dll1</i>   | CCCATCCGATTCCCCTTCG     | GGTTTTCTGTTGCGAGGTCATC  |
| <i>Mylpf</i>  | CCCCAGAAGAAGTCTCCAA     | TGCAAAGGTGTCCCGAAGAT    |
| <i>Musk</i>   | TTCAGCGGGACTGAGAACT     | TGTCTTCCACGCTCAGAATG    |
| <i>Myh1</i>   | CGGAGTCAGGTGAATACTCACG  | GAGCATGAGCTAAGGCACTCT   |
| <i>Dysf</i>   | CAGCCTGATTTTTTCGAGGGGT  | ACCACCACGAGAAGTTCTGAG   |
| <i>Ttn</i>    | GACACCACAAGGTGCAAAGTC   | CCCACTGTTCTTGACCGTATCT  |
| <i>Notch1</i> | GGATGCTGACTGCATGGAT     | AATCATGAGGGGTGTGAAGC    |
| <i>Notch2</i> | CCATTTCAAGTGTTTCGTGTCC  | CACATTCATCGATGTTCTCTTCA |
| <i>Jag1</i>   | TGGCCGAGGTCCTACACTT     | GCCTTTTCAATTATGCTATCAGG |
| <i>Jag2</i>   | CTTTCACCCTCATCGTGGA     | TCAGCAGCTCCTCATCTGG     |
| <i>Hes1</i>   | TGCCAGCTGATATAATGGAGAA  | CCATGATAGGCTTTGATGACTTT |
| <i>Actin</i>  | AAGGCCAACCGTGAAAAGAT    | GTGGTACGACCAGAGGCATAC   |

### Zebrafish cDNA primer sequences used for Quantitative PCR

| Gene Name      | Forward                | Reverse                |
|----------------|------------------------|------------------------|
| <i>lpin1</i>   | AGACAAGAGAAGCCACACT    | CACTACTGCCCACTGACTGA   |
| <i>pou3f1</i>  | CTCCAACACCGACTGGACCAG  | GTCTGCGAGTAAACCAGAGAC  |
| <i>egr1</i>    | CAACGCCACAGCACCTGAAGG  | GATGCCACCAGCCCACTCAC   |
| <i>egr2a</i>   | CAGGTCCACCTTCAGACTGC   | CTTGGCAGCTGCTGTTCTG    |
| <i>egr2b</i>   | GATAGCATCTATTCGGTGGAC  | GATCACGCCCTCTGGGTCCAG  |
| <i>apoea</i>   | GAGGGACAACATCAAGGCCAC  | GTATTCAGTGACACGATCCTTC |
| <i>ccnd1</i>   | CAGAGAAGTTGTGCATATACAC | CAGTATCTGCTTGGAGCTCTG  |
| <i>mpz</i>     | CTGGCAGTGGACTTCTCCAG   | CAGGTGAAGGTTCCATTGTC   |
| <i>ppm22a</i>  | CACATGGAGATACGAGTTATG  | GATGATGGCACCCTCATCAC   |
| <i>myog</i>    | AGCACATTGATGAACCCCAAC  | CGGGGACACAGTGATCAGAC   |
| <i>acta1a</i>  | GTGATGGTGTGACCCACAATG  | GACCTGACCGTCAGGAAGCTC  |
| <i>acta2</i>   | CAGCCATGTATGTAGCTATTC  | GACGAATGAGTAGCCTCGTTC  |
| <i>deltaC</i>  | AGAAATACTGAGCGCGGACT   | CGAGTCTTCTTTTGGTGGCC   |
| <i>mylpfa</i>  | ATACCGTCTCGACATGGCAC   | CCTCCAGCTCCTCATTCTTCA  |
| <i>musk</i>    | CAATAAGGTATTACGATTCAG  | CATGGCAGCACTGCTTTGGAC  |
| <i>myhz1.1</i> | CCTCCAGCTCCTCATTCTTCA  | ATGCTTCCAGTCCGAGATCC   |
| <i>ryr1a</i>   | CCTGTGAGGGTTTTGGGAAT   | TCTGAGTAGGATAGCGTGCC   |

|                |                         |                            |
|----------------|-------------------------|----------------------------|
| <i>ttn</i>     | GAGTACCTCTTCCGTGTCACTG  | CAAGTCAGGAACCATAGTGC       |
| <i>lrp4</i>    | ATCCCGGCGTGAGTAACC      | TGTGCGGTCTCGATCTTCA        |
| <i>axin2</i>   | GTAGTGGGTCTGTCTGCCAA    | ACTTCACTGTCATTGGCACTC      |
| <i>neurogl</i> | GGGTAAAGAGCAAGACAGACG   | GCGAAAAGGAGTAGTCACAGC      |
| <i>pax2a</i>   | GTGTGGAGAGTTTACGGAAGC   | AGACTGGGCTTGACTTCGTC       |
| <i>ache</i>    | CTTCAATACACTGATTGGATG   | CCTGAGTGGATGGGCGTCATC      |
| <i>isl1</i>    | GTGATGAGAGCACGTTCAAGG   | CTTGTGCACATGAGGTCGAAG      |
| <i>neurod1</i> | GACTCGAGGATGAGGACGACG   | CTCGATCTTGAGAGCTTCTG       |
| <i>nrg1</i>    | CTGAAGGCAGGAGGGCTGATC   | CGTCCTCCACTGTCACGCTC       |
| <i>jag1b</i>   | GTGTGGATGGTGAAAAGTGGT   | GGGAGAAGACTGACACTCATTATATT |
| <i>jag2b</i>   | GAGAAAAGAGCGCGAGAGAC    | GGTCCCCTGGTTGTTGAC         |
| <i>notch1a</i> | ATGCAGAGCCGGATTGAG      | GAATCCAGCCACGTCGTC         |
| <i>notch2</i>  | ATCGACGAGTGTGTCATTGG    | GATGTCCTGCTCACACGTCG       |
| <i>her1</i>    | GCGACTGCGAGAGATCAAG     | ATGGCATCTGGGGTCTCC         |
| <i>lim1</i>    | AGTCCGAGAAGAATGCGAAC    | GGCCGTAGTACTCGCTTTGA       |
| <i>chrna1</i>  | GATGGCAACCTTGTGATCATC   | GTGAGGAAGGAGAACAGCATG      |
| <i>chrnb1</i>  | GTGGCTTCCTGATATTGTTCTC  | CATGTTGAAGATCCACTTCTG      |
| <i>chrnb1l</i> | GACTGGCAGAATTGCTCAATG   | CAGGTAGAAGGTGATGTCCTC      |
| <i>chrnd</i>   | GTAGATATTTACCTGGCTCTGAC | CCAGTACATATCTCCACTGG       |
| <i>chrne</i>   | CATACTACACAGTGTGGCTAC   | CTGAGACCTGAAGACCAGTG       |
| <i>chrng</i>   | CAGAATTGCAGCATGGTGTTTC  | GATCTCCTGGTGCTCCAGCTC      |

**Supplementary Table S2: Variants from exome analysis**

|       | total  | 1000G | Function | synonymous | deleterious |
|-------|--------|-------|----------|------------|-------------|
| SNP   | 112651 | 8214  | 2526     | 1601       | 817         |
| Indel | 15152  | 5834  | 414      | 414        | 414         |

**Supplementary Table S3: List of all SNP variants**

| CHROM | POS      | REF | ALT | GeneName                   | Gene                                                                 | AAChange                                                                                                                                                                                                                                           |
|-------|----------|-----|-----|----------------------------|----------------------------------------------------------------------|----------------------------------------------------------------------------------------------------------------------------------------------------------------------------------------------------------------------------------------------------|
| 1     | 2704254  | T   | C   | TTC34                      | NM_001242672                                                         | TTC34:NM_001242672:exon2:c.A107G:p.H36R                                                                                                                                                                                                            |
| 1     | 3428582  | G   | A   | MEGF6                      | NM_001409                                                            | MEGF6:NM_001409:exon8:c.C964T:p.R322W                                                                                                                                                                                                              |
| 1     | 6215695  | G   | A   | CHD5                       | NM_015557                                                            | CHD5:NM_015557:exon4:c.C470T:p.T157M                                                                                                                                                                                                               |
| 1     | 6272311  | G   | C   | RNF207                     | NM_207396                                                            | RNF207:NM_207396:exon14:c.G1317C:p.Q439H                                                                                                                                                                                                           |
| 1     | 7838187  | A   | G   | VAMP3                      | NM_004781                                                            | VAMP3:NM_004781:exon4:c.A241G:p.I81V                                                                                                                                                                                                               |
| 1     | 9801308  | C   | T   | CLSTN1                     | NM_001009566,NM_001302883,NM_014944                                  | CLSTN1:NM_014944:exon9:c.G1333A:p.D445N,CLSTN1:NM_001009566:exon10:c.G1363A:p.D455N,CLSTN1:NM_001302883:exon10:c.G1363A:p.D455N                                                                                                                    |
| 1     | 10521569 | C   | T   | DFFA                       | NM_004401                                                            | DFFA:NM_004401:exon6:c.G974A:p.R325Q                                                                                                                                                                                                               |
| 1     | 11721244 | G   | A   | FBXO44                     | NM_001014765,NM_001304790,NM_001304791,NM_033182,NM_183412,NM_183413 | FBXO44:NM_183412:exon5:c.G557A:p.R186Q,FBXO44:NM_183413:exon5:c.G557A:p.R186Q,FBXO44:NM_001304790:exon6:c.G557A:p.R186Q,FBXO44:NM_001304791:exon6:c.G682A:p.G228S,FBXO44:NM_033182:exon6:c.G682A:p.G228S,FBXO44:NM_001014765:exon7:c.G682A:p.G228S |
| 1     | 11856343 | C   | T   | MTHFR                      | NM_005957                                                            | MTHFR:NM_005957:exon5:c.G700A:p.D234N                                                                                                                                                                                                              |
| 1     | 12907449 | C   | G   | HNRNPCL3,HNRNPCL4,HNRNPCL1 | NM_001013631,NM_001146181,NM_001302551                               | HNRNPCL3:NM_001146181:exon1:c.G694C:p.D232H,HNRNPCL4:NM_001302551:exon1:c.G694C:p.D232H,HNRNPCL1:NM_001013631:exon2:c.G694C:p.D232H                                                                                                                |
| 1     | 16461581 | G   | A   | EPHA2                      | NM_004431                                                            | EPHA2:NM_004431:exon7:c.C1532T:p.T511M                                                                                                                                                                                                             |
| 1     | 17945875 | G   | A   | ARHGEF10L                  | NM_001011722,NM_018125                                               | ARHGEF10L:NM_001011722:exon8:c.G760A:p.V254I,ARHGEF10L:NM_018125:exon10:c.G877A:p.V293I                                                                                                                                                            |
| 1     | 20640937 | G   | A   | VWA5B1                     | NM_001039500                                                         | VWA5B1:NM_001039500:exon4:c.G415A:p.E139K                                                                                                                                                                                                          |
| 1     | 22222455 | G   | T   | HSPG2                      | NM_001291860,NM_005529                                               | HSPG2:NM_001291860:exon3:c.C204A:p.D68E,HSPG2:NM_005529:exon3:c.C204A:p.D68E                                                                                                                                                                       |



|   |           |   |   |                    |                                                                      |                                                                                                                                                     |
|---|-----------|---|---|--------------------|----------------------------------------------------------------------|-----------------------------------------------------------------------------------------------------------------------------------------------------|
| 1 | 25729169  | T | C | RHCE               | NM_020485,NM_138616,NM_138617,NM_138618                              | RHCE:NM_020485:exon3:c.A404G:p.N135S,RHCE:NM_138616:exon3:c.A404G:p.N135S,RHCE:NM_138617:exon3:c.A404G:p.N135S,RHCE:NM_138618:exon3:c.A404G:p.N135S |
| 1 | 26314810  | G | A | PAFAH2             | NM_000437                                                            | PAFAH2:NM_000437:exon4:c.C253T:p.R85C                                                                                                               |
| 1 | 29391485  | C | T | EPB41              | NM_001166005,NM_001166006,NM_001166007,NM_004437,NM_203342,NM_203343 | .                                                                                                                                                   |
| 1 | 32204476  | G | A | BAI2               | NM_001294335,NM_001294336                                            | ADGRB2:NM_001294335:exon16:c.C2558T:p.P853L,ADGRB2:NM_001294336:exon16:c.C2558T:p.P853L                                                             |
| 1 | 36772294  | C | T | SH3D21             | NM_001162530                                                         | SH3D21:NM_001162530:exon2:c.C100T:p.R34W                                                                                                            |
| 1 | 41107525  | C | T | RIMS3              | NM_014747                                                            | RIMS3:NM_014747:exon3:c.G73A:p.G25S                                                                                                                 |
| 1 | 42902196  | C | T | ZMYND12            | NM_001146192,NM_032257                                               | ZMYND12:NM_001146192:exon4:c.G283A:p.A95T,ZMYND12:NM_032257:exon5:c.G613A:p.A205T                                                                   |
| 1 | 47607807  | A | G | CYP4A22            | NM_001010969                                                         | CYP4A22:NM_001010969:exon4:c.A410G:p.Q137R                                                                                                          |
| 1 | 62189400  | T | C | TM2D1              | NM_032027                                                            | TM2D1:NM_032027:exon2:c.A223G:p.N75D                                                                                                                |
| 1 | 68564437  | C | T | GNG12-AS1,WLS      | NR_040077;NM_001002292                                               | .                                                                                                                                                   |
| 1 | 74716413  | C | A | FPGT-TNNI3K,TNNI3K | NM_001112808,NM_001199327,NM_015978                                  | TNNI3K:NM_015978:exon4:c.C293A:p.T98K,FPGT-TNNI3K:NM_001112808:exon6:c.C635A:p.T212K,FPGT-TNNI3K:NM_001199327:exon6:c.C635A:p.T212K                 |
| 1 | 89414937  | C | A | CCBL2              | NM_001008661,NM_001008662                                            | CCBL2:NM_001008662:exon10:c.G876T:p.W292C,CCBL2:NM_001008661:exon11:c.G978T:p.W326C                                                                 |
| 1 | 95699802  | C | T | RWDD3              | NM_001128142,NM_001199682,NM_015485                                  | RWDD3:NM_001128142:exon1:c.C16T:p.Q6X,RWDD3:NM_001199682:exon1:c.C16T:p.Q6X,RWDD3:NM_015485:exon1:c.C16T:p.Q6X                                      |
| 1 | 117142613 | C | T | IGSF3              | NM_001007237,NM_001542                                               | IGSF3:NM_001007237:exon7:c.G1979A:p.R660Q,IGSF3:NM_001542:exon7:c.G2039A:p.R680Q                                                                    |
| 1 | 117142641 | G | A | IGSF3              | NM_001007237,NM_001542                                               | IGSF3:NM_001007237:exon7:c.C1951T:p.R651W,IGSF3:NM_001542:exon7:c.C2011T:p.R671W                                                                    |
| 1 | 117142700 | C | A | IGSF3              | NM_001007237,NM_001542                                               | IGSF3:NM_001007237:exon7:c.G1892T:p.S631I,IGSF3:NM_001542:exon7:c.G1952T:p.S651I                                                                    |

|   |           |   |   |         |                                                               |                                                                                                                                                                                                                               |
|---|-----------|---|---|---------|---------------------------------------------------------------|-------------------------------------------------------------------------------------------------------------------------------------------------------------------------------------------------------------------------------|
| 1 | 117142736 | A | G | IGSF3   | NM_001007237,NM_001542                                        | IGSF3:NM_001007237:exon7:c.T1856C:p.I619T,IGSF3:NM_001542:exon7:c.T1916C:p.I639T                                                                                                                                              |
| 1 | 117142868 | C | T | IGSF3   | NM_001007237,NM_001542                                        | IGSF3:NM_001007237:exon7:c.G1724A:p.W575X,IGSF3:NM_001542:exon7:c.G1784A:p.W595X                                                                                                                                              |
| 1 | 117146504 | G | A | IGSF3   | NM_001007237,NM_001542                                        | IGSF3:NM_001007237:exon6:c.C1366T:p.R456C,IGSF3:NM_001542:exon6:c.C1426T:p.R476C                                                                                                                                              |
| 1 | 117311140 | A | G | CD2     | NM_001767                                                     | CD2:NM_001767:exon5:c.A791G:p.K264R                                                                                                                                                                                           |
| 1 | 120056870 | G | A | HSD3B1  | NM_000862                                                     | HSD3B1:NM_000862:exon4:c.G724A:p.D242N                                                                                                                                                                                        |
| 1 | 143767513 | A | T | PPIAL4G | NM_001123068                                                  | PPIAL4G:NM_001123068:exon1:c.T336A:p.F112L                                                                                                                                                                                    |
| 1 | 144866643 | G | A | PDE4DIP | NM_001198832,NM_001198834,NM_014644                           | PDE4DIP:NM_001198834:exon34:c.C5599T:p.R1867C,PDE4DIP:NM_014644:exon34:c.C5599T:p.R1867C,PDE4DIP:NM_001198832:exon36:c.C5281T:p.R1761C                                                                                        |
| 1 | 144868170 | C | T | PDE4DIP | NM_001198832,NM_001198834,NM_014644                           | PDE4DIP:NM_001198834:exon33:c.G5269A:p.A1757T,PDE4DIP:NM_014644:exon33:c.G5269A:p.A1757T,PDE4DIP:NM_001198832:exon35:c.G4951A:p.A1651T                                                                                        |
| 1 | 144874038 | T | C | PDE4DIP | NM_001198832,NM_001198834,NM_014644                           | .                                                                                                                                                                                                                             |
| 1 | 144874815 | T | C | PDE4DIP | NM_001198832,NM_001198834,NM_014644                           | PDE4DIP:NM_001198834:exon30:c.A4793G:p.H1598R,PDE4DIP:NM_014644:exon30:c.A4793G:p.H1598R,PDE4DIP:NM_001198832:exon33:c.A4661G:p.H1554R                                                                                        |
| 1 | 144882823 | C | T | PDE4DIP | NM_001198832,NM_001198834,NM_014644                           | PDE4DIP:NM_001198834:exon24:c.G3196A:p.A1066T,PDE4DIP:NM_014644:exon24:c.G3196A:p.A1066T,PDE4DIP:NM_001198832:exon27:c.G3394A:p.A1132T                                                                                        |
| 1 | 144912233 | C | T | PDE4DIP | NM_001002811,NM_001002812,NM_001198832,NM_001198834,NM_014644 | PDE4DIP:NM_001002811:exon11:c.G2531A:p.R844H,PDE4DIP:NM_001002812:exon15:c.G2042A:p.R681H,PDE4DIP:NM_001198834:exon15:c.G2042A:p.R681H,PDE4DIP:NM_014644:exon15:c.G2042A:p.R681H,PDE4DIP:NM_001198832:exon18:c.G2240A:p.R747H |
| 1 | 144915561 | G | A | PDE4DIP | NM_001002811,NM_001002812,NM_001198832,NM_001198834,NM_014644 | PDE4DIP:NM_001002811:exon10:c.C2353T:p.R785X,PDE4DIP:NM_001002812:exon14:c.C1864T:p.R622X,PDE4DIP:NM_001198834:exon14:c.C1864T:p.R622X,PDE4DIP:NM_014644:exon14:c.C1864T:p.R622X,PDE4DIP:NM_001198832:exon17:c.C2062T:p.R688X |

|   |           |   |   |         |                                                               |                                                                                                                                                                                                                              |
|---|-----------|---|---|---------|---------------------------------------------------------------|------------------------------------------------------------------------------------------------------------------------------------------------------------------------------------------------------------------------------|
| 1 | 144916676 | C | T | PDE4DIP | NM_001002811,NM_001002812,NM_001198832,NM_001198834,NM_014644 | PDE4DIP:NM_001002811:exon9:c.G2168A:p.W723X,PDE4DIP:NM_001002812:exon13:c.G1679A:p.W560X,PDE4DIP:NM_001198834:exon13:c.G1679A:p.W560X,PDE4DIP:NM_014644:exon13:c.G1679A:p.W560X,PDE4DIP:NM_001198832:exon16:c.G1877A:p.W626X |
| 1 | 144916748 | C | G | PDE4DIP | NM_001002811,NM_001002812,NM_001198832,NM_001198834,NM_014644 | PDE4DIP:NM_001002811:exon9:c.G2096C:p.S699T,PDE4DIP:NM_001002812:exon13:c.G1607C:p.S536T,PDE4DIP:NM_001198834:exon13:c.G1607C:p.S536T,PDE4DIP:NM_014644:exon13:c.G1607C:p.S536T,PDE4DIP:NM_001198832:exon16:c.G1805C:p.S602T |
| 1 | 144918957 | T | A | PDE4DIP | NM_001002811,NM_001002812,NM_001198832,NM_001198834,NM_014644 | PDE4DIP:NM_001002811:exon6:c.A1718T:p.E573V,PDE4DIP:NM_001002812:exon10:c.A1229T:p.E410V,PDE4DIP:NM_001198834:exon10:c.A1229T:p.E410V,PDE4DIP:NM_014644:exon10:c.A1229T:p.E410V,PDE4DIP:NM_001198832:exon13:c.A1427T:p.E476V |
| 1 | 144922523 | C | T | PDE4DIP | NM_001002811,NM_001002812,NM_001198832,NM_001198834,NM_014644 | PDE4DIP:NM_001002811:exon3:c.G1373A:p.R458H,PDE4DIP:NM_001002812:exon7:c.G884A:p.R295H,PDE4DIP:NM_001198834:exon7:c.G884A:p.R295H,PDE4DIP:NM_014644:exon7:c.G884A:p.R295H,PDE4DIP:NM_001198832:exon10:c.G1082A:p.R361H       |
| 1 | 144922583 | G | A | PDE4DIP | NM_001002811,NM_001002812,NM_001198832,NM_001198834,NM_014644 | PDE4DIP:NM_001002811:exon3:c.C1313T:p.S438L,PDE4DIP:NM_001002812:exon7:c.C824T:p.S275L,PDE4DIP:NM_001198834:exon7:c.C824T:p.S275L,PDE4DIP:NM_014644:exon7:c.C824T:p.S275L,PDE4DIP:NM_001198832:exon10:c.C1022T:p.S341L       |
| 1 | 144930940 | T | C | PDE4DIP | NM_001002811                                                  | PDE4DIP:NM_001002811:exon1:c.A769G:p.K257E                                                                                                                                                                                   |
| 1 | 144931330 | C | T | PDE4DIP | NM_001002811                                                  | PDE4DIP:NM_001002811:exon1:c.G379A:p.A127T                                                                                                                                                                                   |
| 1 | 145021150 | T | C | PDE4DIP | NM_001198832,NM_022359                                        | PDE4DIP:NM_001198832:exon2:c.A38G:p.D13G,PDE4DIP:NM_022359:exon2:c.A251G:p.D84G                                                                                                                                              |
| 1 | 145075683 | C | T | PDE4DIP | NM_022359                                                     | PDE4DIP:NM_022359:exon1:c.G180A:p.W60X                                                                                                                                                                                       |
| 1 | 145103947 | T | C | SEC22B  | NM_004892                                                     | UNKNOWN                                                                                                                                                                                                                      |
| 1 | 145109549 | G | T | SEC22B  | NM_004892                                                     | UNKNOWN                                                                                                                                                                                                                      |
| 1 | 145109583 | C | A | SEC22B  | NM_004892                                                     | UNKNOWN                                                                                                                                                                                                                      |
| 1 | 145109661 | G | A | SEC22B  | NM_004892                                                     | UNKNOWN                                                                                                                                                                                                                      |
| 1 | 145112414 | T | C | SEC22B  | NM_004892                                                     | UNKNOWN                                                                                                                                                                                                                      |
| 1 | 145112420 | C | T | SEC22B  | NM_004892                                                     | UNKNOWN                                                                                                                                                                                                                      |

|   |           |   |   |                                |                                                               |                                                                                                                                 |
|---|-----------|---|---|--------------------------------|---------------------------------------------------------------|---------------------------------------------------------------------------------------------------------------------------------|
| 1 | 145112428 | C | T | SEC22B                         | NM_004892                                                     | UNKNOWN                                                                                                                         |
| 1 | 145112485 | C | T | SEC22B                         | NM_004892                                                     | UNKNOWN                                                                                                                         |
| 1 | 145115810 | A | G | SEC22B                         | NM_004892                                                     | UNKNOWN                                                                                                                         |
| 1 | 145115820 | T | C | SEC22B                         | NM_004892                                                     | UNKNOWN                                                                                                                         |
| 1 | 149859105 | G | A | HIST2H2A<br>B                  | NM_175065                                                     | HIST2H2AB:NM_175065:exon1:c.C362T:p.T121M                                                                                       |
| 1 | 155217643 | C | T | FAM189B                        | NM_001267608,NM_006589,NM_198264                              | FAM189B:NM_198264:exon9:c.G1649A:p.R550H,FAM189B:NM_001267608:exon11:c.G1883A:p.R628H,FAM189B:NM_006589:exon12:c.G1937A:p.R646H |
| 1 | 161165952 | C | T | ADAMTS4                        | NM_005099                                                     | .                                                                                                                               |
| 1 | 179965908 | T | A | CEP350                         | NM_014810                                                     | CEP350:NM_014810:exon6:c.T616A:p.L206M                                                                                          |
| 1 | 196309515 | T | C | KCNT2                          | NM_001287819,NM_001287820,NM_198503                           | KCNT2:NM_001287820:exon15:c.A1589G:p.H530R,KCNT2:NM_001287819:exon16:c.A1739G:p.H580R,KCNT2:NM_198503:exon16:c.A1739G:p.H580R   |
| 1 | 196918703 | T | G | CFHR2                          | NM_005666                                                     | CFHR2:NM_005666:exon2:c.T177G:p.F59L                                                                                            |
| 1 | 197069932 | C | A | ASPM                           | NM_018136                                                     | ASPM:NM_018136:exon18:c.G8449T:p.A2817S                                                                                         |
| 1 | 197564470 | G | A | DENND1B                        | NM_001195215,NM_001300858,NM_144977                           | .                                                                                                                               |
| 1 | 201178819 | G | A | IGFN1                          | NM_001164586                                                  | IGFN1:NM_001164586:exon12:c.G4798A:p.A1600T                                                                                     |
| 1 | 201181220 | C | T | IGFN1                          | NM_001164586                                                  | IGFN1:NM_001164586:exon12:c.C7199T:p.T2400M                                                                                     |
| 1 | 201778370 | C | T | NAV1                           | NM_001167738,NM_020443                                        | NAV1:NM_001167738:exon18:c.C3104T:p.P1035L,NAV1:NM_020443:exon21:c.C4286T:p.P1429L                                              |
| 1 | 201869461 | C | T | LMOD1                          | NM_012134                                                     | LMOD1:NM_012134:exon2:c.G680A:p.R227H                                                                                           |
| 1 | 205353468 | G | A | LEMD1                          | NM_001199050,NM_001199051                                     | LEMD1:NM_001199051:exon4:c.C172T:p.R58C,LEMD1:NM_001199050:exon5:c.C295T:p.R99C                                                 |
| 1 | 206516261 | C | T | SRGAP2B,<br>SRGAP2,S<br>RGAP2C | NM_001170637,NM_001271870,NM_001271872,NM_001300952,NM_015326 | UNKNOWN                                                                                                                         |

|   |           |   |   |                                |                                                                       |                                                                                                                                                                |
|---|-----------|---|---|--------------------------------|-----------------------------------------------------------------------|----------------------------------------------------------------------------------------------------------------------------------------------------------------|
| 1 | 206566903 | G | A | SRGAP2B,<br>SRGAP2,S<br>RGAP2C | NM_001170637,NM_00127187<br>0,NM_001271872,NM_001300<br>952,NM_015326 | UNKNOWN                                                                                                                                                        |
| 1 | 226570838 | T | G | PARP1                          | NM_001618                                                             | PARP1:NM_001618:exon8:c.A1058C:p.Q353P                                                                                                                         |
| 1 | 229662992 | A | G | ABCB10                         | NM_012089                                                             | ABCB10:NM_012089:exon9:c.T1709C:p.I570T                                                                                                                        |
| 1 | 232581501 | C | T | SIPA1L2                        | NM_020808                                                             | SIPA1L2:NM_020808:exon9:c.G3127A:p.V1043M                                                                                                                      |
| 1 | 236702306 | C | T | LGALS8                         | NM_006499,NM_201543,NM_<br>201544,NM_201545                           | LGALS8:NM_201544:exon4:c.C262T:p.R88W,LGALS8:NM_006499:exon5:c<br>.C262T:p.R88W,LGALS8:NM_201543:exon5:c.C262T:p.R88W,LGALS8:NM<br>201545:exon5:c.C262T:p.R88W |
| 1 | 240370985 | C | T | FMN2                           | NM_001305424,NM_020066                                                | FMN2:NM_020066:exon5:c.C2873T:p.P958L,FMN2:NM_001305424:exon6:c<br>.C2885T:p.P962L                                                                             |
| 1 | 241718903 | T | C | KMO                            | NM_003679                                                             | .                                                                                                                                                              |
| 1 | 243328887 | G | T | CEP170                         | NM_001042404,NM_00104240<br>5,NM_014812                               | CEP170:NM_001042404:exon12:c.C2081A:p.S694X,CEP170:NM_001042405<br>:exon12:c.C2081A:p.S694X,CEP170:NM_014812:exon13:c.C2375A:p.S792X                           |
| 1 | 245222729 | C | T | EFCAB2                         | NM_001143943,NM_00129032<br>7,NM_032328                               | EFCAB2:NM_001143943:exon3:c.C152T:p.T51M,EFCAB2:NM_001290327:<br>exon4:c.C182T:p.T61M,EFCAB2:NM_032328:exon4:c.C152T:p.T51M                                    |
| 1 | 245861491 | C | T | KIF26B                         | NM_018012                                                             | KIF26B:NM_018012:exon13:c.C5908T:p.R1970C                                                                                                                      |
| 1 | 248262834 | C | T | OR2L13                         | NM_001304535,NM_175911                                                | OR2L13:NM_001304535:exon2:c.C157T:p.R53C,OR2L13:NM_175911:exon3<br>:c.C157T:p.R53C                                                                             |
| 2 | 10186320  | G | A | KLF11                          | NM_001177716,NM_00117771<br>8,NM_003597                               | KLF11:NM_001177716:exon2:c.G35A:p.R12Q,KLF11:NM_001177718:exon2<br>:c.G35A:p.R12Q,KLF11:NM_003597:exon2:c.G86A:p.R29Q                                          |
| 2 | 11944690  | A | C | LPIN1                          | NM_001261427,NM_00126142<br>8,NM_145693                               | LPIN1:NM_145693:exon15:c.A2047C:p.I683L,LPIN1:NM_001261427:exon1<br>6:c.A2065C:p.I689L,LPIN1:NM_001261428:exon17:c.A2302C:p.I768L                              |
| 2 | 11955273  | G | A | LPIN1                          | NM_001261427,NM_00126142<br>8,NM_145693                               | LPIN1:NM_145693:exon17:c.G2201A:p.R734Q,LPIN1:NM_001261427:exon<br>18:c.G2219A:p.R740Q,LPIN1:NM_001261428:exon19:c.G2456A:p.R819Q                              |
| 2 | 18741450  | A | T | RDH14                          | NM_020905                                                             | RDH14:NM_020905:exon1:c.T389A:p.L130H                                                                                                                          |
| 2 | 20205933  | C | T | MATN3                          | NM_002381                                                             | MATN3:NM_002381:exon2:c.G362A:p.R121Q                                                                                                                          |
| 2 | 37296064  | C | A | HEATR5B                        | NM_019024                                                             | HEATR5B:NM_019024:exon8:c.G937T:p.V313F                                                                                                                        |
| 2 | 38302213  | G | C | CYP1B1                         | NM_000104                                                             | CYP1B1:NM_000104:exon2:c.C319G:p.L107V                                                                                                                         |

|   |           |   |   |                 |                                                               |                                                                                                                                                                                                      |
|---|-----------|---|---|-----------------|---------------------------------------------------------------|------------------------------------------------------------------------------------------------------------------------------------------------------------------------------------------------------|
| 2 | 39095403  | C | T | DHX57           | NM_198963                                                     | DHX57:NM_198963:exon2:c.G145A:p.G49S                                                                                                                                                                 |
| 2 | 44586653  | G | A | PREPL           | NM_001042385,NM_001042386,NM_001171603,NM_001171606,NM_006036 | PREPL:NM_001042385:exon1:c.C202T:p.R68W,PREPL:NM_001042386:exon1:c.C202T:p.R68W,PREPL:NM_006036:exon1:c.C202T:p.R68W,PREPL:NM_001171603:exon2:c.C202T:p.R68W,PREPL:NM_001171606:exon2:c.C202T:p.R68W |
| 2 | 53941512  | T | C | ASB3,GPR75-ASB3 | NM_001164165,NM_001201965,NM_016115,NM_145863                 | .                                                                                                                                                                                                    |
| 2 | 54561964  | A | C | C2orf73         | NM_001100396                                                  | C2orf73:NM_001100396:exon2:c.A37C:p.I13L                                                                                                                                                             |
| 2 | 61348420  | G | A | KIAA1841        | NM_001129993                                                  | .                                                                                                                                                                                                    |
| 2 | 68389669  | C | G | PNO1            | NM_020143                                                     | .                                                                                                                                                                                                    |
| 2 | 71036500  | C | T | CLEC4F          | NM_173535                                                     | CLEC4F:NM_173535:exon7:c.G1673A:p.G558E                                                                                                                                                              |
| 2 | 73762010  | C | G | ALMS1           | NM_015120                                                     | ALMS1:NM_015120:exon12:c.C9838G:p.Q3280E                                                                                                                                                             |
| 2 | 74687644  | C | T | WBP1            | NM_012477                                                     | WBP1:NM_012477:exon4:c.C646T:p.L216F                                                                                                                                                                 |
| 2 | 74709546  | C | T | CCDC142         | NM_032779                                                     | CCDC142:NM_032779:exon1:c.G419A:p.W140X                                                                                                                                                              |
| 2 | 74717206  | C | T | TTC31           | NM_022492                                                     | TTC31:NM_022492:exon3:c.C184T:p.R62W                                                                                                                                                                 |
| 2 | 75899101  | T | C | GCFC2           | NM_001201334,NM_003203                                        | GCFC2:NM_001201334:exon14:c.A1424G:p.E475G,GCFC2:NM_003203:exon14:c.A1931G:p.E644G                                                                                                                   |
| 2 | 86697366  | T | A | KDM3A           | NM_001146688,NM_018433                                        | KDM3A:NM_001146688:exon11:c.T1559A:p.L520H,KDM3A:NM_018433:exon11:c.T1559A:p.L520H                                                                                                                   |
| 2 | 97217534  | G | C | ARID5A          | NM_212481                                                     | ARID5A:NM_212481:exon7:c.G1269C:p.K423N                                                                                                                                                              |
| 2 | 97877478  | G | A | ANKRD36         | NM_001164315                                                  | ANKRD36:NM_001164315:exon58:c.G3469A:p.V1157M                                                                                                                                                        |
| 2 | 100199386 | G | T | AFF3            | NM_001025108,NM_002285                                        | AFF3:NM_001025108:exon16:c.C2742A:p.H914Q,AFF3:NM_002285:exon16:c.C2667A:p.H889Q                                                                                                                     |
| 2 | 102626142 | C | G | IL1R2           | NM_001261419,NM_004633                                        | IL1R2:NM_001261419:exon3:c.C186G:p.S62R,IL1R2:NM_004633:exon3:c.C186G:p.S62R                                                                                                                         |
| 2 | 103095699 | G | A | SLC9A4          | NM_001011552                                                  | SLC9A4:NM_001011552:exon2:c.G658A:p.V220M                                                                                                                                                            |
| 2 | 112922638 | T | A | FBLN7           | NM_001128165,NM_153214                                        | FBLN7:NM_001128165:exon3:c.T296A:p.V99E,FBLN7:NM_153214:exon3:c.T296A:p.V99E                                                                                                                         |
| 2 | 120414023 | A | G | CFAP221         | NM_001271049                                                  | CFAP221:NM_001271049:exon24:c.A2500G:p.N834D                                                                                                                                                         |
| 2 | 130951949 | G | A | TUBA3E          | NM_207312                                                     | TUBA3E:NM_207312:exon4:c.C466T:p.R156W                                                                                                                                                               |

|   |           |   |   |         |                                                                   |                                                                                                                                                                                                                                                                   |
|---|-----------|---|---|---------|-------------------------------------------------------------------|-------------------------------------------------------------------------------------------------------------------------------------------------------------------------------------------------------------------------------------------------------------------|
| 2 | 135744469 | T | C | MAP3K19 | NM_001018044,NM_025052                                            | MAP3K19:NM_001018044:exon5:c.A1634G:p.N545S,MAP3K19:NM_025052:exon7:c.A1973G:p.N658S                                                                                                                                                                              |
| 2 | 136480126 | A | G | R3HDM1  | NM_001282798,NM_001282799,NM_001282800,NM_015361                  | .                                                                                                                                                                                                                                                                 |
| 2 | 148676144 | A | C | ACVR2A  | NM_001278579,NM_001278580,NM_001616                               | ACVR2A:NM_001278580:exon7:c.A621C:p.K207N,ACVR2A:NM_001616:exon7:c.A945C:p.K315N,ACVR2A:NM_001278579:exon8:c.A945C:p.K315N                                                                                                                                        |
| 2 | 152484154 | C | G | NEB     | NM_001164507,NM_001164508,NM_001271208,NM_004543                  | NEB:NM_004543:exon65:c.G9261C:p.K3087N,NEB:NM_001164507:exon69:c.G10026C:p.K3342N,NEB:NM_001164508:exon69:c.G10026C:p.K3342N,NEB:NM_001271208:exon69:c.G10026C:p.K3342N                                                                                           |
| 2 | 153532910 | T | C | PRPF40A | NM_017892                                                         | .                                                                                                                                                                                                                                                                 |
| 2 | 155102453 | G | C | GALNT13 | NM_001301627,NM_052917                                            | GALNT13:NM_001301627:exon5:c.G815C:p.R272T,GALNT13:NM_052917:exon7:c.G815C:p.R272T                                                                                                                                                                                |
| 2 | 160181398 | G | A | BAZ2B   | NM_001289975,NM_013450                                            | BAZ2B:NM_001289975:exon35:c.C6169T:p.L2057F,BAZ2B:NM_013450:exon36:c.C6277T:p.L2093F                                                                                                                                                                              |
| 2 | 163144647 | T | C | IFIH1   | NM_022168                                                         | IFIH1:NM_022168:exon5:c.A1093G:p.K365E                                                                                                                                                                                                                            |
| 2 | 165381518 | A | G | GRB14   | NM_001303422,NM_004490                                            | GRB14:NM_001303422:exon4:c.T413C:p.L138S,GRB14:NM_004490:exon5:c.T674C:p.L225S                                                                                                                                                                                    |
| 2 | 165947256 | C | T | SCN3A   | NM_001081676,NM_001081677,NM_006922                               | SCN3A:NM_001081676:exon28:c.G5260A:p.D1754N,SCN3A:NM_001081677:exon28:c.G5260A:p.D1754N,SCN3A:NM_006922:exon28:c.G5407A:p.D1803N                                                                                                                                  |
| 2 | 166912912 | T | G | SCN1A   | NM_001165963,NM_001165964,NM_001202435,NM_006920                  | .                                                                                                                                                                                                                                                                 |
| 2 | 169801131 | G | A | ABCB11  | NM_003742                                                         | ABCB11:NM_003742:exon21:c.C2594T:p.A865V                                                                                                                                                                                                                          |
| 2 | 170762672 | A | G | UBR3    | NM_172070                                                         | UBR3:NM_172070:exon10:c.A1777G:p.R593G                                                                                                                                                                                                                            |
| 2 | 178095985 | C | T | NFE2L2  | NM_001145412,NM_001145413,NM_006164                               | NFE2L2:NM_001145412:exon5:c.G1298A:p.R433H,NFE2L2:NM_001145413:exon5:c.G1277A:p.R426H,NFE2L2:NM_006164:exon5:c.G1346A:p.R449H                                                                                                                                     |
| 2 | 179414895 | C | T | TTN     | NM_001256850,NM_001267550,NM_003319,NM_133378,NM_133432,NM_133437 | TTN:NM_003319:exon165:c.G64475A:p.R21492Q,TTN:NM_133432:exon166:c.G64850A:p.R21617Q,TTN:NM_133437:exon166:c.G65051A:p.R21684Q,TTN:NM_133378:exon286:c.G83966A:p.R27989Q,TTN:NM_001256850:exon287:c.G86747A:p.R28916Q,TTN:NM_001267550:exon337:c.G91670A:p.R30557Q |

|   |           |   |   |                 |                                                                             |                                                                                                                                                                                                                                                                                        |
|---|-----------|---|---|-----------------|-----------------------------------------------------------------------------|----------------------------------------------------------------------------------------------------------------------------------------------------------------------------------------------------------------------------------------------------------------------------------------|
| 2 | 179422112 | G | A | TTN             | NM_001256850,NM_001267550,NM_003319,NM_133378,NM_133432,NM_133437           | TTN:NM_003319:exon157:c.C60682T:p.R20228C,TTN:NM_133432:exon158:c.C61057T:p.R20353C,TTN:NM_133437:exon158:c.C61258T:p.R20420C,TTN:NM_133378:exon278:c.C80173T:p.R26725C,TTN:NM_001256850:exon279:c.C82954T:p.R27652C,TTN:NM_001267550:exon329:c.C87877T:p.R29293C                      |
| 2 | 179430744 | C | A | TTN             | NM_001256850,NM_001267550,NM_003319,NM_133378,NM_133432,NM_133437           | TTN:NM_003319:exon154:c.G52920T:p.E17640D,TTN:NM_133432:exon155:c.G53295T:p.E17765D,TTN:NM_133437:exon155:c.G53496T:p.E17832D,TTN:NM_133378:exon275:c.G72411T:p.E24137D,TTN:NM_001256850:exon276:c.G75192T:p.E25064D,TTN:NM_001267550:exon326:c.G80115T:p.E26705D                      |
| 2 | 179441340 | C | T | TTN             | NM_001256850,NM_001267550,NM_003319,NM_133378,NM_133432,NM_133437           | TTN:NM_003319:exon153:c.G42436A:p.E14146K,TTN:NM_133432:exon154:c.G42811A:p.E14271K,TTN:NM_133437:exon154:c.G43012A:p.E14338K,TTN:NM_133378:exon274:c.G61927A:p.E20643K,TTN:NM_001256850:exon275:c.G64708A:p.E21570K,TTN:NM_001267550:exon325:c.G69631A:p.E23211K                      |
| 2 | 179466433 | T | G | TTN             | NM_001256850,NM_001267550,NM_003319,NM_133378,NM_133432,NM_133437           | TTN:NM_003319:exon114:c.A28189C:p.K9397Q,TTN:NM_133432:exon115:c.A28564C:p.K9522Q,TTN:NM_133437:exon115:c.A28765C:p.K9589Q,TTN:NM_133378:exon235:c.A47680C:p.K15894Q,TTN:NM_001256850:exon236:c.A50461C:p.K16821Q,TTN:NM_001267550:exon286:c.A55384C:p.K18462Q                         |
| 2 | 179631326 | T | C | TTN             | NM_001256850,NM_001267550,NM_003319,NM_133378,NM_133379,NM_133432,NM_133437 | TTN:NM_003319:exon40:c.A9347G:p.Q3116R,TTN:NM_133432:exon40:c.A9347G:p.Q3116R,TTN:NM_133437:exon40:c.A9347G:p.Q3116R,TTN:NM_001256850:exon41:c.A9485G:p.Q3162R,TTN:NM_001267550:exon41:c.A9485G:p.Q3162R,TTN:NM_133378:exon41:c.A9485G:p.Q3162R,TTN:NM_133379:exon41:c.A9485G:p.Q3162R |
| 2 | 180829352 | T | C | CWC22           | NM_020943                                                                   | CWC22:NM_020943:exon13:c.A1319G:p.Q440R                                                                                                                                                                                                                                                |
| 2 | 198414992 | C | T | HSPE1-MOB4,MOB4 | NM_001100819,NM_001202485,NM_001204094,NM_015387,NM_199482                  |                                                                                                                                                                                                                                                                                        |
| 2 | 203620264 | C | T | FAM117B         | NM_173511                                                                   | FAM117B:NM_173511:exon5:c.C964T:p.P322S                                                                                                                                                                                                                                                |
| 2 | 204000661 | A | C | NBEAL1          | NM_001114132                                                                | NBEAL1:NM_001114132:exon27:c.A3988C:p.S1330R                                                                                                                                                                                                                                           |
| 2 | 207171216 | A | G | ZDBF2           | NM_001285549,NM_020923                                                      | ZDBF2:NM_020923:exon5:c.A1964G:p.D655G,ZDBF2:NM_001285549:exon                                                                                                                                                                                                                         |



|   |           |   |   |         |                                                  |                                                                                                                                                             |
|---|-----------|---|---|---------|--------------------------------------------------|-------------------------------------------------------------------------------------------------------------------------------------------------------------|
|   |           |   |   |         |                                                  | 7:c.A1958G:p.D653G                                                                                                                                          |
| 2 | 207625630 | A | G | MDH1B   | NM_001039845,NM_001282940                        | MDH1B:NM_001039845:exon2:c.T130C:p.W44R,MDH1B:NM_001282940:exon2:c.T130C:p.W44R                                                                             |
| 2 | 209108301 | T | C | IDH1    | NM_001282386,NM_001282387,NM_005896              | IDH1:NM_001282386:exon6:c.A548G:p.Y183C,IDH1:NM_001282387:exon6:c.A548G:p.Y183C,IDH1:NM_005896:exon6:c.A548G:p.Y183C                                        |
| 2 | 211456637 | A | G | CPS1    | NM_001122633,NM_001875                           | CPS1:NM_001875:exon10:c.A1030G:p.T344A,CPS1:NM_001122633:exon11:c.A1048G:p.T350A                                                                            |
| 2 | 215914429 | T | G | ABCA12  | NM_173076                                        | ABCA12:NM_173076:exon6:c.A614C:p.N205T                                                                                                                      |
| 2 | 219290468 | T | G | VIL1    | NM_007127                                        | VIL1:NM_007127:exon4:c.T281G:p.V94G                                                                                                                         |
| 2 | 220500493 | C | T | SLC4A3  | NM_005070,NM_201574                              | SLC4A3:NM_005070:exon14:c.C2071T:p.R691C,SLC4A3:NM_201574:exon14:c.C2152T:p.R718C                                                                           |
| 2 | 233273011 | C | G | ALPPL2  | NM_031313                                        | ALPPL2:NM_031313:exon6:c.C683G:p.P228R                                                                                                                      |
| 2 | 233735070 | C | G | C2orf82 | NM_206895                                        | C2orf82:NM_206895:exon1:c.C19G:p.L7V                                                                                                                        |
| 2 | 242716387 | G | A | GAL3ST2 | NM_022134                                        | GAL3ST2:NM_022134:exon1:c.G17A:p.G6D                                                                                                                        |
| 3 | 8661567   | C | G | SSUH2   | NM_001256748,NM_001256749,NM_015931              | SSUH2:NM_001256748:exon12:c.G1115C:p.C372S,SSUH2:NM_001256749:exon12:c.G896C:p.C299S,SSUH2:NM_015931:exon12:c.G1049C:p.C350S                                |
| 3 | 9787553   | C | T | BRPF1   | NM_001003694,NM_004634                           | BRPF1:NM_001003694:exon12:c.C3263T:p.P1088L,BRPF1:NM_004634:exon12:c.C3245T:p.P1082L                                                                        |
| 3 | 10401576  | C | T | ATP2B2  | NM_001001331,NM_001683                           | ATP2B2:NM_001683:exon10:c.G1756A:p.V586M,ATP2B2:NM_001001331:exon13:c.G1891A:p.V631M                                                                        |
| 3 | 12046131  | A | C | SYN2    | NM_003178,NM_133625                              | UNKNOWN                                                                                                                                                     |
| 3 | 12187229  | C | T | SYN2    | NM_003178,NM_133625                              | UNKNOWN                                                                                                                                                     |
| 3 | 14712693  | G | A | CCDC174 | NM_016474                                        | CCDC174:NM_016474:exon11:c.G1396A:p.V466M                                                                                                                   |
| 3 | 17052327  | C | T | PLCL2   | NM_001144382,NM_015184                           | PLCL2:NM_015184:exon2:c.C1111T:p.R371C                                                                                                                      |
| 3 | 27203969  | C | T | NEK10   | NM_001031741,NM_001304384,NM_152534              | NEK10:NM_001031741:exon10:c.G929A:p.R310Q,NEK10:NM_001304384:exon10:c.G929A:p.R310Q,NEK10:NM_152534:exon32:c.G2993A:p.R998Q                                 |
| 3 | 28378233  | G | T | AZI2    | NM_001134432,NM_001134433,NM_001271650,NM_022461 | AZI2:NM_001134432:exon5:c.C583A:p.Q195K,AZI2:NM_001134433:exon5:c.C583A:p.Q195K,AZI2:NM_022461:exon5:c.C583A:p.Q195K,AZI2:NM_001271650:exon6:c.C247A:p.Q83K |

|   |          |   |   |         |                                                  |                                                                                                                                                                                  |
|---|----------|---|---|---------|--------------------------------------------------|----------------------------------------------------------------------------------------------------------------------------------------------------------------------------------|
| 3 | 33668484 | T | C | CLASP2  | NM_001207044,NM_015097                           | CLASP2:NM_001207044:exon4:c.A332G:p.N111S,CLASP2:NM_015097:exon10:c.A1034G:p.N345S                                                                                               |
| 3 | 36897630 | C | A | TRANK1  | NM_014831                                        | TRANK1:NM_014831:exon12:c.G3451T:p.V1151L                                                                                                                                        |
| 3 | 38752340 | G | A | SCN10A  | NM_001293306,NM_001293307,NM_006514              | SCN10A:NM_001293307:exon22:c.C3844T:p.R1282W,SCN10A:NM_001293306:exon23:c.C4135T:p.R1379W,SCN10A:NM_006514:exon23:c.C4138T:p.R1380W                                              |
| 3 | 38798298 | A | C | SCN10A  | NM_001293306,NM_001293307,NM_006514              | SCN10A:NM_001293306:exon9:c.T1157G:p.F386C,SCN10A:NM_001293307:exon9:c.T1157G:p.F386C,SCN10A:NM_006514:exon9:c.T1157G:p.F386C                                                    |
| 3 | 39185834 | G | A | CSRNP1  | NM_033027                                        | CSRNP1:NM_033027:exon4:c.C574T:p.R192W                                                                                                                                           |
| 3 | 42728107 | C | G | KLHL40  | NM_152393                                        | KLHL40:NM_152393:exon1:c.C997G:p.P333A                                                                                                                                           |
| 3 | 48561230 | C | G | PFKFB4  | NM_004567                                        | PFKFB4:NM_004567:exon11:c.G1126C:p.V376L                                                                                                                                         |
| 3 | 49155449 | G | A | USP19   | NM_001199160,NM_001199161,NM_001199162,NM_006677 | USP19:NM_001199160:exon3:c.C229T:p.R77C,USP19:NM_001199161:exon3:c.C229T:p.R77C,USP19:NM_001199162:exon3:c.C229T:p.R77C,USP19:NM_006677:exon3:c.C229T:p.R77C                     |
| 3 | 49736537 | C | T | RNF123  | NM_022064                                        | RNF123:NM_022064:exon10:c.C763T:p.R255C                                                                                                                                          |
| 3 | 49751224 | T | A | RNF123  | NM_022064                                        | RNF123:NM_022064:exon29:c.T2803A:p.S935T                                                                                                                                         |
| 3 | 49843379 | A | G | UBA7    | NM_003335                                        | UBA7:NM_003335:exon23:c.T2860C:p.Y954H                                                                                                                                           |
| 3 | 51967583 | C | G | RRP9    | NM_004704                                        | RRP9:NM_004704:exon15:c.G1367C:p.R456P                                                                                                                                           |
| 3 | 52553551 | G | A | STAB1   | NM_015136                                        | STAB1:NM_015136:exon50:c.G5206A:p.G1736S                                                                                                                                         |
| 3 | 56763357 | G | A | ARHGEF3 | NM_001128615,NM_001128616,NM_001289698,NM_019555 | ARHGEF3:NM_001128616:exon10:c.C1540T:p.R514C,ARHGEF3:NM_019555:exon10:c.C1522T:p.R508C,ARHGEF3:NM_001289698:exon11:c.C1540T:p.R514C,ARHGEF3:NM_001128615:exon13:c.C1618T:p.R540C |
| 3 | 57494251 | T | C | DNAH12  | NM_001291661,NM_198564                           | DNAH12:NM_198564:exon7:c.A559G:p.N187D                                                                                                                                           |
| 3 | 72864491 | G | A | SHQ1    | NM_018130                                        | .                                                                                                                                                                                |
| 3 | 75786670 | G | A | ZNF717  | NM_001128223,NM_001290208,NM_001290209           | ZNF717:NM_001128223:exon5:c.C2104T:p.P702S,ZNF717:NM_001290208:exon5:c.C2104T:p.P702S,ZNF717:NM_001290209:exon5:c.C1954T:p.P652S                                                 |
| 3 | 75786942 | C | A | ZNF717  | NM_001128223,NM_001290208,NM_001290209           | ZNF717:NM_001128223:exon5:c.G1832T:p.R611I,ZNF717:NM_001290208:exon5:c.G1832T:p.R611I,ZNF717:NM_001290209:exon5:c.G1682T:p.R561I                                                 |

|   |           |   |   |          |                                                  |                                                                                                                                                              |
|---|-----------|---|---|----------|--------------------------------------------------|--------------------------------------------------------------------------------------------------------------------------------------------------------------|
| 3 | 75787405  | C | T | ZNF717   | NM_001128223,NM_001290208,NM_001290209           | ZNF717:NM_001128223:exon5:c.G1369A:p.G457R,ZNF717:NM_001290208:exon5:c.G1369A:p.G457R,ZNF717:NM_001290209:exon5:c.G1219A:p.G407R                             |
| 3 | 75787516  | C | G | ZNF717   | NM_001128223,NM_001290208,NM_001290209           | ZNF717:NM_001128223:exon5:c.G1258C:p.E420Q,ZNF717:NM_001290208:exon5:c.G1258C:p.E420Q,ZNF717:NM_001290209:exon5:c.G1108C:p.E370Q                             |
| 3 | 75787519  | C | A | ZNF717   | NM_001128223,NM_001290208,NM_001290209           | ZNF717:NM_001128223:exon5:c.G1255T:p.G419W,ZNF717:NM_001290208:exon5:c.G1255T:p.G419W,ZNF717:NM_001290209:exon5:c.G1105T:p.G369W                             |
| 3 | 75788130  | C | A | ZNF717   | NM_001128223,NM_001290208,NM_001290209           | ZNF717:NM_001128223:exon5:c.G644T:p.G215V,ZNF717:NM_001290208:exon5:c.G644T:p.G215V,ZNF717:NM_001290209:exon5:c.G494T:p.G165V                                |
| 3 | 75788158  | G | C | ZNF717   | NM_001128223,NM_001290208,NM_001290209           | ZNF717:NM_001128223:exon5:c.C616G:p.L206V,ZNF717:NM_001290208:exon5:c.C616G:p.L206V,ZNF717:NM_001290209:exon5:c.C466G:p.L156V                                |
| 3 | 97598601  | A | G | CRYBG3   | NM_153605                                        | .                                                                                                                                                            |
| 3 | 105243240 | A | T | ALCAM    | NM_001243280,NM_001243281,NM_001243283,NM_001627 | ALCAM:NM_001243280:exon3:c.A282T:p.E94D,ALCAM:NM_001243281:exon3:c.A282T:p.E94D,ALCAM:NM_001243283:exon3:c.A282T:p.E94D,ALCAM:NM_001627:exon3:c.A282T:p.E94D |
| 3 | 112546020 | G | A | CD200R1L | NM_001008784,NM_001199215                        | CD200R1L:NM_001008784:exon4:c.C499T:p.P167S,CD200R1L:NM_001199215:exon5:c.C436T:p.P146S                                                                      |
| 3 | 113322844 | G | A | SIDT1    | NM_017699                                        | SIDT1:NM_017699:exon13:c.G1301A:p.R434Q                                                                                                                      |
| 3 | 113753763 | C | G | KIAA1407 | NM_020817                                        | .                                                                                                                                                            |
| 3 | 113755549 | T | C | KIAA1407 | NM_020817                                        | KIAA1407:NM_020817:exon5:c.A500G:p.D167G                                                                                                                     |
| 3 | 121209212 | G | A | POLQ     | NM_199420                                        | POLQ:NM_199420:exon16:c.C2566T:p.R856C                                                                                                                       |
| 3 | 124492558 | G | C | ITGB5    | NM_002213                                        | ITGB5:NM_002213:exon11:c.C1895G:p.P632R                                                                                                                      |
| 3 | 138738941 | G | C | PRR23B   | NM_001013650                                     | PRR23B:NM_001013650:exon1:c.C563G:p.P188R                                                                                                                    |
| 3 | 142215345 | A | G | ATR      | NM_001184                                        | ATR:NM_001184:exon34:c.T5756C:p.M1919T                                                                                                                       |
| 3 | 148545839 | T | A | CPB1     | NM_001871                                        | CPB1:NM_001871:exon2:c.T122A:p.I41N                                                                                                                          |
| 3 | 150931203 | G | A | P2RY14   | NM_001081455,NM_014879                           | P2RY14:NM_001081455:exon3:c.C902T:p.P301L,P2RY14:NM_014879:exon3:c.C902T:p.P301L                                                                             |
| 3 | 151545958 | T | C | AADAC    | NM_001086                                        | AADAC:NM_001086:exon5:c.T1198C:p.X400Q                                                                                                                       |

|   |           |   |   |         |                                                                                 |                                                                                                                                                                                                                                                                                                         |
|---|-----------|---|---|---------|---------------------------------------------------------------------------------|---------------------------------------------------------------------------------------------------------------------------------------------------------------------------------------------------------------------------------------------------------------------------------------------------------|
| 3 | 155267674 | C | G | PLCH1   | NM_001130960,NM_001130961,NM_014996                                             | PLCH1:NM_001130960:exon9:c.G1228C:p.G410R,PLCH1:NM_001130961:exon9:c.G1228C:p.G410R,PLCH1:NM_014996:exon9:c.G1174C:p.G392R                                                                                                                                                                              |
| 3 | 155838607 | C | G | KCNAB1  | NM_172160                                                                       | KCNAB1:NM_172160:exon1:c.C207G:p.N69K                                                                                                                                                                                                                                                                   |
| 3 | 169485590 | T | C | ACTRT3  | NM_032487                                                                       | ACTRT3:NM_032487:exon2:c.A749G:p.Q250R                                                                                                                                                                                                                                                                  |
| 3 | 170584249 | C | A | RPL22L1 | NM_001099645                                                                    | RPL22L1:NM_001099645:exon4:c.G289T:p.V97F                                                                                                                                                                                                                                                               |
| 3 | 171330183 | C | T | PLD1    | NM_001130081,NM_002662                                                          | PLD1:NM_001130081:exon24:c.G2654A:p.R885H,PLD1:NM_002662:exon25:c.G2768A:p.R923H                                                                                                                                                                                                                        |
| 3 | 179439202 | C | T | USP13   | NM_003940                                                                       | USP13:NM_003940:exon8:c.C913T:p.L305F                                                                                                                                                                                                                                                                   |
| 3 | 180327501 | C | T | TTC14   | NM_001288582,NM_133462                                                          | TTC14:NM_001288582:exon12:c.C1484T:p.S495F,TTC14:NM_133462:exon12:c.C1484T:p.S495F                                                                                                                                                                                                                      |
| 3 | 190374095 | G | A | IL1RAP  | NM_001167931                                                                    | IL1RAP:NM_001167931:exon12:c.G1763A:p.R588K                                                                                                                                                                                                                                                             |
| 3 | 191179177 | T | G | PYDC2   | NM_001083308                                                                    | PYDC2:NM_001083308:exon1:c.T226G:p.F76V                                                                                                                                                                                                                                                                 |
| 3 | 193332805 | T | C | OPA1    | NM_015560,NM_130831,NM_130832,NM_130833,NM_130834,NM_130835,NM_130836,NM_130837 | OPA1:NM_015560:exon2:c.T326C:p.V109A,OPA1:NM_130831:exon2:c.T326C:p.V109A,OPA1:NM_130832:exon2:c.T326C:p.V109A,OPA1:NM_130833:exon2:c.T326C:p.V109A,OPA1:NM_130834:exon2:c.T326C:p.V109A,OPA1:NM_130835:exon2:c.T326C:p.V109A,OPA1:NM_130836:exon2:c.T326C:p.V109A,OPA1:NM_130837:exon2:c.T326C:p.V109A |
| 3 | 195456561 | C | G | MUC20   | NM_001282506,NM_001291833,NM_020790,NM_152673                                   | MUC20:NM_001282506:exon3:c.C2012G:p.S671C,MUC20:NM_001291833:exon5:c.C1499G:p.S500C,MUC20:NM_020790:exon5:c.C1556G:p.S519C,MUC20:NM_152673:exon5:c.C1499G:p.S500C                                                                                                                                       |
| 3 | 195935382 | T | C | ZDHHC19 | NM_001039617                                                                    | ZDHHC19:NM_001039617:exon4:c.A458G:p.N153S                                                                                                                                                                                                                                                              |
| 4 | 2932856   | G | A | MFSD10  | NM_001120,NM_001146069                                                          | MFSD10:NM_001120:exon11:c.C1184T:p.T395M,MFSD10:NM_001146069:exon12:c.C1184T:p.T395M                                                                                                                                                                                                                    |
| 4 | 2993963   | G | C | GRK4    | NM_001004056,NM_001004057,NM_005307,NM_182982                                   | GRK4:NM_001004056:exon3:c.G187C:p.D63H,GRK4:NM_005307:exon3:c.G187C:p.D63H,GRK4:NM_001004057:exon4:c.G283C:p.D95H,GRK4:NM_182982:exon4:c.G283C:p.D95H                                                                                                                                                   |
| 4 | 3516528   | C | T | LRPAP1  | NM_002337                                                                       | LRPAP1:NM_002337:exon7:c.G962A:p.R321H                                                                                                                                                                                                                                                                  |
| 4 | 9922071   | G | A | SLC2A9  | NM_001001290,NM_020041                                                          | SLC2A9:NM_020041:exon7:c.C940T:p.R314C,SLC2A9:NM_001001290:exon8:c.C853T:p.R285C                                                                                                                                                                                                                        |
| 4 | 15504497  | G | A | CC2D2A  | NM_001080522                                                                    | CC2D2A:NM_001080522:exon7:c.G389A:p.R130H                                                                                                                                                                                                                                                               |

|   |           |   |   |         |                                                                                         |                                                                                                                                                                                                                                                                                                                        |
|---|-----------|---|---|---------|-----------------------------------------------------------------------------------------|------------------------------------------------------------------------------------------------------------------------------------------------------------------------------------------------------------------------------------------------------------------------------------------------------------------------|
| 4 | 17492351  | G | A | QDPR    | NM_000320                                                                               | QDPR:NM_000320:exon6:c.C563T:p.P188L                                                                                                                                                                                                                                                                                   |
| 4 | 38800152  | A | G | TLR1    | NM_003263                                                                               | TLR1:NM_003263:exon4:c.T301C:p.S101P                                                                                                                                                                                                                                                                                   |
| 4 | 38972741  | C | G | TMEM156 | NM_001303228,NM_024943                                                                  | TMEM156:NM_001303228:exon6:c.G837C:p.R279S, TMEM156:NM_024943:exon6:c.G840C:p.R280S                                                                                                                                                                                                                                    |
| 4 | 39219646  | G | A | WDR19   | NM_025132                                                                               | WDR19:NM_025132:exon14:c.G1400A:p.R467Q                                                                                                                                                                                                                                                                                |
| 4 | 39512385  | T | C | UGDH    | NM_001184701,NM_003359                                                                  | UGDH:NM_001184701:exon3:c.A70G:p.N24D, UGDH:NM_003359:exon4:c.A361G:p.N121D                                                                                                                                                                                                                                            |
| 4 | 41673609  | C | T | LIMCH1  | NM_001112717,NM_001112718,NM_001112719,NM_001112720,NM_001289122,NM_001289124,NM_014988 | LIMCH1:NM_001112720:exon11:c.C1783T:p.P595S, LIMCH1:NM_001112719:exon12:c.C1819T:p.P607S, LIMCH1:NM_001112717:exon17:c.C2281T:p.P761S, LIMCH1:NM_001112718:exon17:c.C2281T:p.P761S, LIMCH1:NM_001289122:exon17:c.C2320T:p.P774S, LIMCH1:NM_001289124:exon17:c.C1843T:p.P615S, LIMCH1:NM_014988:exon17:c.C2281T:p.P761S |
| 4 | 47408896  | G | A | GABRB1  | NM_000812                                                                               | GABRB1:NM_000812:exon8:c.G1033A:p.D345N                                                                                                                                                                                                                                                                                |
| 4 | 52942986  | G | C | SPATA18 | NM_001297608,NM_145263                                                                  | SPATA18:NM_001297608:exon6:c.G704C:p.R235P, SPATA18:NM_145263:exon7:c.G800C:p.R267P                                                                                                                                                                                                                                    |
| 4 | 54294293  | C | G | FIP1L1  | NM_001134937,NM_001134938,NM_030917                                                     | FIP1L1:NM_001134938:exon10:c.C895G:p.P299A, FIP1L1:NM_001134937:exon12:c.C1072G:p.P358A, FIP1L1:NM_030917:exon13:c.C1117G:p.P373A                                                                                                                                                                                      |
| 4 | 89020503  | A | G | ABCG2   | NM_001257386,NM_004827                                                                  | ABCG2:NM_001257386:exon12:c.T1465C:p.F489L, ABCG2:NM_004827:exon12:c.T1465C:p.F489L                                                                                                                                                                                                                                    |
| 4 | 103451068 | A | G | NFKB1   | NM_001165412,NM_003998                                                                  | NFKB1:NM_001165412:exon3:c.A115G:p.T39A, NFKB1:NM_003998:exon3:c.A115G:p.T39A                                                                                                                                                                                                                                          |
| 4 | 114208830 | C | G | ANK2    | NM_001127493,NM_001148,NM_020977                                                        | ANK2:NM_001148:exon19:c.C2149G:p.H717D, ANK2:NM_020977:exon19:c.C2149G:p.H717D, ANK2:NM_001127493:exon20:c.C2086G:p.H696D                                                                                                                                                                                              |
| 4 | 120057709 | A | C | MYOZ2   | NM_016599                                                                               | MYOZ2:NM_016599:exon2:c.A29C:p.Q10P                                                                                                                                                                                                                                                                                    |
| 4 | 128904204 | C | T | C4orf29 | NM_001039717                                                                            | .                                                                                                                                                                                                                                                                                                                      |
| 4 | 134071773 | G | A | PCDH10  | NM_020815,NM_032961                                                                     | PCDH10:NM_020815:exon1:c.G478A:p.E160K, PCDH10:NM_032961:exon1:c.G478A:p.E160K                                                                                                                                                                                                                                         |
| 4 | 140454313 | G | A | SETD7   | NM_030648                                                                               | .                                                                                                                                                                                                                                                                                                                      |
| 4 | 155486997 | A | T | FGB     | NM_001184741,NM_005141                                                                  | FGB:NM_001184741:exon2:c.A152T:p.K51M, FGB:NM_005141:exon2:c.A152T:p.K51M                                                                                                                                                                                                                                              |

|   |           |   |   |          |                                                  |                                                                                                                                                                               |
|---|-----------|---|---|----------|--------------------------------------------------|-------------------------------------------------------------------------------------------------------------------------------------------------------------------------------|
| 4 | 156830079 | T | G | TDO2     | NM_005651                                        | TDO2:NM_005651:exon5:c.T344G:p.M115R                                                                                                                                          |
| 4 | 164087555 | C | A | NAF1     | NM_001128931,NM_138386                           | NAF1:NM_001128931:exon1:c.G325T:p.D109Y,NAF1:NM_138386:exon1:c.G325T:p.D109Y                                                                                                  |
| 4 | 187086544 | C | T | FAM149A  | NM_001006655,NM_015398                           | FAM149A:NM_001006655:exon10:c.C1090T:p.R364W,FAM149A:NM_015398:exon11:c.C1090T:p.R364W                                                                                        |
| 4 | 188924533 | C | T | ZFP42    | NM_001304358,NM_174900                           | ZFP42:NM_001304358:exon3:c.C572T:p.P191L,ZFP42:NM_174900:exon4:c.C572T:p.P191L                                                                                                |
| 5 | 54941697  | T | A | SLC38A9  | NM_001258286,NM_001258287,NM_001282429,NM_173514 | SLC38A9:NM_001258286:exon10:c.A898T:p.T300S,SLC38A9:NM_001258287:exon10:c.A898T:p.T300S,SLC38A9:NM_001282429:exon11:c.A715T:p.T239S,SLC38A9:NM_173514:exon12:c.A1087T:p.T363S |
| 5 | 60455940  | T | C | SMIM15   | NM_001048249                                     | SMIM15:NM_001048249:exon3:c.A59G:p.Y20C                                                                                                                                       |
| 5 | 72864311  | T | C | UTP15    | NM_001284430,NM_032175                           | UTP15:NM_001284430:exon4:c.T193C:p.Y65H,UTP15:NM_032175:exon4:c.T250C:p.Y84H                                                                                                  |
| 5 | 78379596  | G | T | BHMT2    | NM_001178005,NM_017614                           | BHMT2:NM_001178005:exon6:c.G735T:p.R245S,BHMT2:NM_017614:exon7:c.G927T:p.R309S                                                                                                |
| 5 | 78985833  | G | A | CMYA5    | NM_153610                                        | CMYA5:NM_153610:exon1:c.G103A:p.E35K                                                                                                                                          |
| 5 | 79031546  | T | C | CMYA5    | NM_153610                                        | CMYA5:NM_153610:exon2:c.T6958C:p.Y2320H                                                                                                                                       |
| 5 | 79465316  | G | A | SERINC5  | NM_001174071,NM_001174072,NM_178276              | SERINC5:NM_001174071:exon6:c.C605T:p.T202M,SERINC5:NM_001174072:exon6:c.C605T:p.T202M,SERINC5:NM_178276:exon6:c.C605T:p.T202M                                                 |
| 5 | 82816229  | G | A | VCAN     | NM_001164098,NM_004385                           | VCAN:NM_001164098:exon7:c.G2104A:p.E702K,VCAN:NM_004385:exon7:c.G2104A:p.E702K                                                                                                |
| 5 | 82837060  | G | C | VCAN     | NM_001164097,NM_004385                           | VCAN:NM_001164097:exon7:c.G5277C:p.R1759S,VCAN:NM_004385:exon8:c.G8238C:p.R2746S                                                                                              |
| 5 | 89979916  | A | G | GPR98    | NM_032119                                        | ADGRV1:NM_032119:exon28:c.A6178G:p.I2060V                                                                                                                                     |
| 5 | 96430474  | G | A | LIX1     | NM_153234                                        | LIX1:NM_153234:exon6:c.C827T:p.T276M                                                                                                                                          |
| 5 | 110438051 | C | G | WDR36    | NM_139281                                        | WDR36:NM_139281:exon6:c.C718G:p.L240V                                                                                                                                         |
| 5 | 110439903 | G | A | WDR36    | NM_139281                                        | WDR36:NM_139281:exon8:c.G926A:p.S309N                                                                                                                                         |
| 5 | 115394604 | G | A | ARL14EPL | NM_001195581                                     | ARL14EPL:NM_001195581:exon3:c.G419A:p.G140E                                                                                                                                   |
| 5 | 126383565 | G | A | C5orf63  | NM_001164479                                     | C5orf63:NM_001164479:exon5:c.C214T:p.R72C                                                                                                                                     |
| 5 | 126860562 | G | A | PRRC1    | NM_001286808,NM_130809                           | PRRC1:NM_001286808:exon3:c.G443A:p.R148K,PRRC1:NM_130809:exon3                                                                                                                |

|   |           |   |   |          |                                     |                                                                                                                         |
|---|-----------|---|---|----------|-------------------------------------|-------------------------------------------------------------------------------------------------------------------------|
|   |           |   |   |          |                                     | :c.G443A:p.R148K                                                                                                        |
| 5 | 129019910 | C | A | ADAMTS19 | NM_133638                           | ADAMTS19:NM_133638:exon18:c.C2744A:p.P915H                                                                              |
| 5 | 137222565 | T | A | MYOT     | NM_001135940,NM_001300911,NM_006790 | MYOT:NM_001135940:exon9:c.T651A:p.D217E,MYOT:NM_006790:exon9:c.T1203A:p.D401E,MYOT:NM_001300911:exon10:c.T858A:p.D286E  |
| 5 | 138855862 | C | A | TMEM173  | NM_198282                           | TMEM173:NM_198282:exon8:c.G1124T:p.R375L                                                                                |
| 5 | 140209553 | T | C | PCDHA6   | NM_018909,NM_031848                 | PCDHA6:NM_018909:exon1:c.T1877C:p.L626P,PCDHA6:NM_031848:exon1:c.T1877C:p.L626P                                         |
| 5 | 140250471 | G | T | PCDHA11  | NM_018902,NM_031861                 | PCDHA11:NM_018902:exon1:c.G1783T:p.A595S,PCDHA11:NM_031861:exon1:c.G1783T:p.A595S                                       |
| 5 | 140563561 | C | A | PCDHB16  | NM_020957                           | PCDHB16:NM_020957:exon1:c.C1427A:p.T476K                                                                                |
| 5 | 143539987 | C | T | YIPF5    | NM_001024947,NM_001271732,NM_030799 | YIPF5:NM_001271732:exon5:c.G586A:p.V196I,YIPF5:NM_001024947:exon6:c.G748A:p.V250I,YIPF5:NM_030799:exon6:c.G748A:p.V250I |
| 5 | 147820689 | G | T | FBXO38   | NM_001271723,NM_030793              | FBXO38:NM_001271723:exon20:c.G2542T:p.V848F,FBXO38:NM_030793:exon21:c.G3052T:p.V1018F                                   |
| 5 | 149277984 | A | G | PDE6A    | NM_000440                           | PDE6A:NM_000440:exon10:c.T1349C:p.F450S                                                                                 |
| 5 | 149929236 | C | G | NDST1    | NM_001301063,NM_001543              | .                                                                                                                       |
| 5 | 150056367 | G | A | MYOZ3    | NM_001122853,NM_133371              | MYOZ3:NM_001122853:exon7:c.G686A:p.R229H,MYOZ3:NM_133371:exon7:c.G686A:p.R229H                                          |
| 5 | 156533787 | T | C | HAVCR2   | NM_032782                           | HAVCR2:NM_032782:exon2:c.A245G:p.Y82C                                                                                   |
| 5 | 156917329 | C | A | ADAM19   | NM_033274                           | ADAM19:NM_033274:exon19:c.G2229T:p.R743S                                                                                |
| 5 | 167645928 | G | A | TENM2    | NM_001122679                        | TENM2:NM_001122679:exon23:c.G5005A:p.G1669S                                                                             |
| 5 | 170221295 | G | C | GABRP    | NM_001291985,NM_014211              | GABRP:NM_001291985:exon4:c.G233C:p.S78T,GABRP:NM_014211:exon4:c.G233C:p.S78T                                            |
| 5 | 170883789 | C | T | FGF18    | NM_003862                           | FGF18:NM_003862:exon5:c.C604T:p.R202W                                                                                   |
| 5 | 171480055 | G | A | STK10    | NM_005990                           | .                                                                                                                       |
| 5 | 172659590 | A | T | NKX2-5   | NM_004387                           | NKX2-5:NM_004387:exon2:c.T957A:p.H319Q                                                                                  |
| 5 | 175959412 | C | T | RNF44    | NM_014901                           | RNF44:NM_014901:exon2:c.G62A:p.R21Q                                                                                     |
| 5 | 176793213 | G | A | RGS14    | NM_006480                           | RGS14:NM_006480:exon3:c.G103A:p.E35K                                                                                    |

|   |           |   |   |          |                                                  |                                                                                                                                                               |
|---|-----------|---|---|----------|--------------------------------------------------|---------------------------------------------------------------------------------------------------------------------------------------------------------------|
| 5 | 180551775 | T | C | OR2V1    | NM_001258283                                     | OR2V1:NM_001258283:exon1:c.A530G:p.H177R                                                                                                                      |
| 6 | 24828410  | C | T | FAM65B   | NM_001286445,NM_014722                           | FAM65B:NM_001286445:exon18:c.G2620A:p.G874S,FAM65B:NM_014722:exon19:c.G2683A:p.G895S                                                                          |
| 6 | 25813093  | A | C | SLC17A1  | NM_005074                                        | SLC17A1:NM_005074:exon8:c.T863G:p.F288C                                                                                                                       |
| 6 | 26285633  | T | G | HIST1H4H | NM_003543                                        | HIST1H4H:NM_003543:exon1:c.A95C:p.K32T                                                                                                                        |
| 6 | 26446093  | G | A | BTN3A3   | NM_006994,NM_197974                              | BTN3A3:NM_006994:exon5:c.G595A:p.V199M,BTN3A3:NM_197974:exon5:c.G469A:p.V157M                                                                                 |
| 6 | 27879448  | G | A | OR2B2    | NM_033057                                        | OR2B2:NM_033057:exon1:c.C650T:p.S217L                                                                                                                         |
| 6 | 29012478  | A | C | OR2W1    | NM_030903                                        | OR2W1:NM_030903:exon1:c.T475G:p.L159V                                                                                                                         |
| 6 | 29691576  | G | C | HLA-F    | NM_001098478,NM_001098479,NM_018950              | HLA-F:NM_001098478:exon2:c.G206C:p.R69P,HLA-F:NM_001098479:exon2:c.G206C:p.R69P,HLA-F:NM_018950:exon2:c.G206C:p.R69P                                          |
| 6 | 30653737  | G | A | PPP1R18  | NM_001134870,NM_133471                           | PPP1R18:NM_133471:exon1:c.C59T:p.A20V,PPP1R18:NM_001134870:exon2:c.C59T:p.A20V                                                                                |
| 6 | 30670557  | C | A | MDC1     | NM_014641                                        | MDC1:NM_014641:exon13:c.G5963T:p.S1988I                                                                                                                       |
| 6 | 30673779  | G | A | MDC1     | NM_014641                                        | MDC1:NM_014641:exon10:c.C3181T:p.L1061F                                                                                                                       |
| 6 | 31597380  | C | G | PRRC2A   | NM_004638,NM_080686                              | PRRC2A:NM_004638:exon14:c.C2012G:p.S671C,PRRC2A:NM_080686:exon14:c.C2012G:p.S671C                                                                             |
| 6 | 31778948  | C | T | HSPA1L   | NM_005527                                        | HSPA1L:NM_005527:exon2:c.G802A:p.A268T                                                                                                                        |
| 6 | 32084867  | C | A | ATF6B    | NM_001136153,NM_004381                           | ATF6B:NM_001136153:exon15:c.G1623T:p.K541N,ATF6B:NM_004381:exon15:c.G1632T:p.K544N                                                                            |
| 6 | 32165239  | G | C | NOTCH4   | NM_004557                                        | NOTCH4:NM_004557:exon27:c.C4889G:p.T1630S                                                                                                                     |
| 6 | 32725625  | T | C | HLA-DQB2 | NM_001300790                                     | HLA-DQB2:NM_001300790:exon4:c.A682G:p.S228G                                                                                                                   |
| 6 | 32726803  | C | T | HLA-DQB2 | NM_001198858,NM_001300790                        | HLA-DQB2:NM_001198858:exon3:c.G470A:p.R157Q,HLA-DQB2:NM_001300790:exon3:c.G470A:p.R157Q                                                                       |
| 6 | 32827301  | G | C | PSMB9    | NM_002800                                        | PSMB9:NM_002800:exon6:c.G652C:p.D218H                                                                                                                         |
| 6 | 33236863  | C | T | VPS52    | NM_001289174,NM_001289175,NM_001289176,NM_022553 | VPS52:NM_001289174:exon5:c.G275A:p.R92Q,VPS52:NM_001289175:exon6:c.G101A:p.R34Q,VPS52:NM_001289176:exon6:c.G101A:p.R34Q,VPS52:NM_022553:exon6:c.G476A:p.R159Q |
| 6 | 33282824  | C | T | ZBTB22   | NM_001145338,NM_005453                           | ZBTB22:NM_001145338:exon2:c.G1870A:p.E624K,ZBTB22:NM_005453:exon2:c.G1870A:p.E624K                                                                            |



|   |           |   |   |              |                                     |                                                                                                                        |
|---|-----------|---|---|--------------|-------------------------------------|------------------------------------------------------------------------------------------------------------------------|
| 6 | 33411463  | C | G | SYNGAP1      | NM_006772                           | SYNGAP1:NM_006772:exon15:c.C3134G:p.A1045G                                                                             |
| 6 | 33694588  | C | T | IP6K3        | NM_001142883,NM_054111              | IP6K3:NM_054111:exon4:c.G509A:p.S170N,IP6K3:NM_001142883:exon5:c.G509A:p.S170N                                         |
| 6 | 35209353  | C | T | SCUBE3       | NM_001303136,NM_152753              | SCUBE3:NM_001303136:exon11:c.C1226T:p.S409L,SCUBE3:NM_152753:exon11:c.C1229T:p.S410L                                   |
| 6 | 41126454  | T | A | TREM2        | NM_001271821                        | TREM2:NM_001271821:exon4:c.A547T:p.S183C                                                                               |
| 6 | 41740541  | G | C | FRS3         | NM_006653                           | FRS3:NM_006653:exon5:c.C410G:p.P137R                                                                                   |
| 6 | 47501393  | G | T | CD2AP        | NM_012120                           | CD2AP:NM_012120:exon3:c.G221T:p.R74M                                                                                   |
| 6 | 52344468  | C | G | EFHC1        | NM_001172420,NM_018100              | EFHC1:NM_018100:exon9:c.C1523G:p.T508R,EFHC1:NM_001172420:exon10:c.C1466G:p.T489R                                      |
| 6 | 54002243  | C | G | MLIP         | NM_001281746,NM_001281747           | MLIP:NM_001281746:exon4:c.C1343G:p.P448R,MLIP:NM_001281747:exon4:c.C1376G:p.P459R                                      |
| 6 | 57393125  | A | G | PRIM2        | NM_000947                           | UNKNOWN                                                                                                                |
| 6 | 57393144  | A | T | PRIM2        | NM_000947                           | UNKNOWN                                                                                                                |
| 6 | 57467100  | G | C | PRIM2        | NM_000947                           | UNKNOWN                                                                                                                |
| 6 | 57467175  | A | G | PRIM2        | NM_000947                           | UNKNOWN                                                                                                                |
| 6 | 87968265  | G | C | ZNF292       | NM_015021                           | ZNF292:NM_015021:exon8:c.G4918C:p.A1640P                                                                               |
| 6 | 88331672  | G | A | ORC3         | NM_001197259,NM_012381,NM_181837    | ORC3:NM_001197259:exon10:c.G697A:p.V233M,ORC3:NM_012381:exon11:c.G1126A:p.V376M,ORC3:NM_181837:exon11:c.G1126A:p.V376M |
| 6 | 100062606 | G | T | PRDM13       | NM_021620                           | PRDM13:NM_021620:exon4:c.G2095T:p.V699F                                                                                |
| 6 | 106756282 | T | C | ATG5         | NM_001286106,NM_001286108,NM_004849 | ATG5:NM_001286106:exon3:c.A193G:p.I65V,ATG5:NM_001286108:exon3:c.A193G:p.I65V,ATG5:NM_004849:exon3:c.A193G:p.I65V      |
| 6 | 109560552 | G | A | LOC100996634 | NM_001277339                        | LOC100996634:NM_001277339:exon2:c.G142A:p.E48K                                                                         |
| 6 | 123101544 | C | T | FABP7        | NM_001446                           | FABP7:NM_001446:exon2:c.C182T:p.T61M                                                                                   |
| 6 | 145093086 | G | A | UTRN         | NM_007124                           | UTRN:NM_007124:exon58:c.G8539A:p.E2847K                                                                                |
| 6 | 152621819 | C | A | SYNE1        | NM_033071,NM_182961                 | SYNE1:NM_033071:exon92:c.G17426T:p.R5809L,SYNE1:NM_182961:exon93:c.G17639T:p.R5880L                                    |
| 6 | 152720820 | C | T | SYNE1        | NM_033071,NM_182961                 | SYNE1:NM_033071:exon48:c.G7189A:p.E2397K,SYNE1:NM_182961:exon4                                                         |

|   |           |   |   |        |                                                  |                                                                                                                                                                  |
|---|-----------|---|---|--------|--------------------------------------------------|------------------------------------------------------------------------------------------------------------------------------------------------------------------|
|   |           |   |   |        |                                                  | 8:c.G7168A:p.E2390K                                                                                                                                              |
| 6 | 158359726 | A | G | SNX9   | NM_016224                                        | SNX9:NM_016224:exon16:c.A1595G:p.Q532R                                                                                                                           |
| 6 | 160328358 | C | T | MAS1   | NM_002377                                        | MAS1:NM_002377:exon1:c.C371T:p.T124M                                                                                                                             |
| 6 | 161807897 | G | A | PARK2  | NM_004562,NM_013987,NM_013988                    | PARK2:NM_013988:exon7:c.C649T:p.R217W,PARK2:NM_013987:exon9:c.C1012T:p.R338W,PARK2:NM_004562:exon10:c.C1096T:p.R366W                                             |
| 7 | 1786604   | A | T | ELFN1  | NM_001128636                                     | ELFN1:NM_001128636:exon2:c.A2372T:p.E791V                                                                                                                        |
| 7 | 4050669   | C | T | SDK1   | NM_152744                                        | SDK1:NM_152744:exon15:c.C2203T:p.P735S                                                                                                                           |
| 7 | 4272931   | G | A | SDK1   | NM_001079653,NM_152744                           | SDK1:NM_001079653:exon15:c.G1333A:p.A445T,SDK1:NM_152744:exon41:c.G5872A:p.A1958T                                                                                |
| 7 | 11582681  | T | C | THSD7A | NM_015204                                        | THSD7A:NM_015204:exon5:c.A1517G:p.H506R                                                                                                                          |
| 7 | 12666254  | T | C | SCIN   | NM_001112706,NM_033128                           | SCIN:NM_033128:exon6:c.T286C:p.F96L,SCIN:NM_001112706:exon8:c.T1027C:p.F343L                                                                                     |
| 7 | 16255722  | A | G | ISPD   | NM_001101417,NM_001101426                        | ISPD:NM_001101417:exon8:c.T1070C:p.L357S,ISPD:NM_001101426:exon9:c.T1220C:p.L407S                                                                                |
| 7 | 21892164  | C | T | DNAH11 | NM_001277115                                     | DNAH11:NM_001277115:exon67:c.C10976T:p.A3659V                                                                                                                    |
| 7 | 27689231  | G | A | HIBADH | NM_152740                                        | HIBADH:NM_152740:exon2:c.C113T:p.S38L                                                                                                                            |
| 7 | 29070342  | C | T | CPVL   | NM_019029,NM_031311                              | CPVL:NM_019029:exon12:c.G1171A:p.V391M,CPVL:NM_031311:exon12:c.G1171A:p.V391M                                                                                    |
| 7 | 29943929  | C | T | WIPF3  | NM_001080529                                     | WIPF3:NM_001080529:exon8:c.C1379T:p.A460V                                                                                                                        |
| 7 | 36671667  | C | T | AOAH   | NM_001177506,NM_001177507,NM_001637              | AOAH:NM_001177507:exon5:c.G400A:p.A134T,AOAH:NM_001637:exon6:c.G496A:p.A166T                                                                                     |
| 7 | 40234653  | A | C | SUGCT  | NM_001193311,NM_001193312,NM_001193313,NM_024728 | SUGCT:NM_001193311:exon6:c.A499C:p.I167L,SUGCT:NM_001193312:exon6:c.A499C:p.I167L,SUGCT:NM_001193313:exon6:c.A499C:p.I167L,SUGCT:NM_024728:exon6:c.A388C:p.I130L |
| 7 | 44113399  | C | T | POLM   | NM_001284330,NM_001284331,NM_013284              | POLM:NM_001284330:exon7:c.G1057A:p.G353S,POLM:NM_001284331:exon8:c.G1186A:p.G396S,POLM:NM_013284:exon9:c.G1297A:p.G433S                                          |
| 7 | 44561801  | T | C | NPC1L1 | NM_001101648,NM_013389                           | NPC1L1:NM_001101648:exon11:c.A2678G:p.Y893C,NPC1L1:NM_013389:exon11:c.A2678G:p.Y893C                                                                             |
| 7 | 70228072  | C | T | AUTS2  | NM_001127231,NM_015570                           | AUTS2:NM_001127231:exon7:c.C959T:p.P320L,AUTS2:NM_015570:exon7:c.C959T:p.P320L                                                                                   |

|   |           |   |   |          |                                                                            |                                                                                                                                                                                                                                                      |
|---|-----------|---|---|----------|----------------------------------------------------------------------------|------------------------------------------------------------------------------------------------------------------------------------------------------------------------------------------------------------------------------------------------------|
| 7 | 73151600  | C | T | ABHD11   | NM_148912,NM_148913                                                        | ABHD11:NM_148912:exon4:c.G584A:p.R195H,ABHD11:NM_148913:exon4:c.G563A:p.R188H                                                                                                                                                                        |
| 7 | 73245622  | C | T | CLDN4    | NM_001305                                                                  | CLDN4:NM_001305:exon1:c.C91T:p.R31C                                                                                                                                                                                                                  |
| 7 | 80141152  | C | T | GNAT3    | NM_001102386                                                               | GNAT3:NM_001102386:exon1:c.G91A:p.A31T                                                                                                                                                                                                               |
| 7 | 87180124  | T | C | ABCB1    | NM_000927                                                                  | ABCB1:NM_000927:exon11:c.A1030G:p.S344G                                                                                                                                                                                                              |
| 7 | 94228105  | G | T | SGCE     | NM_001099400,NM_001099401,NM_001301139,NM_003919                           | SGCE:NM_001099400:exon8:c.C1208A:p.P403Q,SGCE:NM_001301139:exon8:c.C1112A:p.P371Q,SGCE:NM_001099401:exon9:c.C1235A:p.P412Q,SGCE:NM_003919:exon9:c.C1235A:p.P412Q                                                                                     |
| 7 | 99704497  | C | T | AP4M1    | NM_004722                                                                  | AP4M1:NM_004722:exon15:c.C1354T:p.R452W                                                                                                                                                                                                              |
| 7 | 99755917  | C | G | C7orf43  | NM_018275                                                                  | C7orf43:NM_018275:exon1:c.G206C:p.R69T                                                                                                                                                                                                               |
| 7 | 100691388 | T | C | MUC17    | NM_001040105                                                               | MUC17:NM_001040105:exon4:c.T12527C:p.I4176T                                                                                                                                                                                                          |
| 7 | 102724261 | C | G | ARMC10   | NM_001161009,NM_001161010,NM_001161011,NM_001161012,NM_001161013,NM_031905 | ARMC10:NM_001161009:exon2:c.C272G:p.A91G,ARMC10:NM_001161011:exon2:c.C272G:p.A91G,ARMC10:NM_001161012:exon2:c.C272G:p.A91G,ARMC10:NM_001161013:exon2:c.C272G:p.A91G,ARMC10:NM_001161010:exon3:c.C377G:p.A126G,ARMC10:NM_031905:exon3:c.C377G:p.A126G |
| 7 | 103180699 | C | T | RELN     | NM_005045,NM_173054                                                        | RELN:NM_005045:exon44:c.G6875A:p.R2292H,RELN:NM_173054:exon44:c.G6875A:p.R2292H                                                                                                                                                                      |
| 7 | 120776099 | G | T | CPED1    | NM_001105533,NM_024913                                                     | CPED1:NM_001105533:exon13:c.G1654T:p.V552F,CPED1:NM_024913:exon14:c.G1654T:p.V552F                                                                                                                                                                   |
| 7 | 121624114 | A | C | PTPRZ1   | NM_001206838,NM_001206839,NM_002851                                        | PTPRZ1:NM_001206838:exon8:c.A871C:p.K291Q,PTPRZ1:NM_001206839:exon8:c.A871C:p.K291Q,PTPRZ1:NM_002851:exon8:c.A871C:p.K291Q                                                                                                                           |
| 7 | 122769473 | A | G | SLC13A1  | NM_022444                                                                  | SLC13A1:NM_022444:exon9:c.T995C:p.V332A                                                                                                                                                                                                              |
| 7 | 128531540 | G | C | KCP      | NM_001135914,NM_199349                                                     | UNKNOWN                                                                                                                                                                                                                                              |
| 7 | 139715641 | G | A | TBXAS1   | NM_001061,NM_001130966,NM_001166253,NM_001166254,NM_030984                 | TBXAS1:NM_001061:exon11:c.G1348A:p.E450K,TBXAS1:NM_030984:exon11:c.G1348A:p.E450K,TBXAS1:NM_001166253:exon12:c.G1486A:p.E496K,TBXAS1:NM_001166254:exon13:c.G1144A:p.E382K,TBXAS1:NM_001130966:exon15:c.G1348A:p.E450K                                |
| 7 | 141635690 | G | T | CLEC5A   | NM_001301167,NM_013252                                                     | CLEC5A:NM_001301167:exon4:c.C200A:p.S67X,CLEC5A:NM_013252:exon5:c.C269A:p.S90X                                                                                                                                                                       |
| 7 | 141889296 | C | G | LOC93432 | NM_001293626                                                               | LOC93432:NM_001293626:exon37:c.C4337G:p.P1446R                                                                                                                                                                                                       |

|   |           |   |   |         |                                                                           |                                                                                                                            |
|---|-----------|---|---|---------|---------------------------------------------------------------------------|----------------------------------------------------------------------------------------------------------------------------|
| 7 | 151797901 | G | A | GALNT11 | NM_001304514,NM_022087                                                    | GALNT11:NM_001304514:exon2:c.G71A:p.R24H,GALNT11:NM_022087:exon3:c.G314A:p.R105H                                           |
| 7 | 151845702 | G | A | KMT2C   | NM_170606                                                                 | KMT2C:NM_170606:exon52:c.C13310T:p.T4437M                                                                                  |
| 7 | 151945007 | C | T | KMT2C   | NM_170606                                                                 | KMT2C:NM_170606:exon14:c.G2512A:p.G838S                                                                                    |
| 7 | 151945204 | G | A | KMT2C   | NM_170606                                                                 | KMT2C:NM_170606:exon14:c.C2315T:p.S772L                                                                                    |
| 7 | 152357858 | G | A | XRCC2   | NM_005431                                                                 | XRCC2:NM_005431:exon2:c.C49T:p.R17X                                                                                        |
| 7 | 155251166 | G | C | EN2     | NM_001427                                                                 | EN2:NM_001427:exon1:c.G94C:p.G32R                                                                                          |
| 8 | 6728273   | T | C | DEFB1   | NM_005218                                                                 | DEFB1:NM_005218:exon2:c.A137G:p.Y46C                                                                                       |
| 8 | 17942229  | C | T | ASAH1   | NM_001127505,NM_004315                                                    | ASAH1:NM_001127505:exon1:c.G82A:p.E28K,ASAH1:NM_004315:exon1:c.G82A:p.E28K                                                 |
| 8 | 21769976  | C | T | DOK2    | NM_003974                                                                 | DOK2:NM_003974:exon2:c.G109A:p.A37T                                                                                        |
| 8 | 21857150  | T | G | XPO7    | NM_015024                                                                 | XPO7:NM_015024:exon24:c.T2747G:p.I916S                                                                                     |
| 8 | 22451419  | C | T | PDLIM2  | NM_021630                                                                 | PDLIM2:NM_021630:exon10:c.C1805T:p.A602V                                                                                   |
| 8 | 22473725  | G | C | CCAR2   | NM_021174                                                                 | CCAR2:NM_021174:exon14:c.G1809C:p.Q603H                                                                                    |
| 8 | 24771405  | T | A | NEFM    | NM_005382                                                                 | NEFM:NM_005382:exon1:c.T99A:p.S33R                                                                                         |
| 8 | 27516969  | G | A | SCARA3  | NM_016240,NM_182826                                                       | SCARA3:NM_016240:exon5:c.G1282A:p.V428I,SCARA3:NM_182826:exon5:c.G1282A:p.V428I                                            |
| 8 | 28013555  | A | G | ELP3    | NM_001284220,NM_00128422,NM_001284224,NM_001284225,NM_001284226,NM_018091 |                                                                                                                            |
| 8 | 33449695  | G | C | DUSP26  | NM_001305115,NM_001305116,NM_024025                                       | DUSP26:NM_001305116:exon3:c.C472G:p.R158G,DUSP26:NM_001305115:exon4:c.C472G:p.R158G,DUSP26:NM_024025:exon4:c.C472G:p.R158G |
| 8 | 39644572  | T | C | ADAM2   | NM_001278113,NM_001278114,NM_001464                                       | ADAM2:NM_001278113:exon9:c.A755G:p.Y252C,ADAM2:NM_001278114:exon10:c.A812G:p.Y271C,ADAM2:NM_001464:exon10:c.A812G:p.Y271C  |
| 8 | 41399354  | G | A | GINS4   | NM_032336                                                                 | GINS4:NM_032336:exon7:c.G511A:p.V171M                                                                                      |
| 8 | 42611002  | T | C | CHRNA6  | NM_001199279,NM_004198                                                    | CHRNA6:NM_001199279:exon4:c.A1295G:p.N432S,CHRNA6:NM_004198:exon5:c.A1340G:p.N447S                                         |
| 8 | 59407065  | C | T | CYP7A1  | NM_000780                                                                 | CYP7A1:NM_000780:exon4:c.G1039A:p.D347N                                                                                    |

|   |           |   |   |         |                                                                            |                                                                                                                                                                                                                                                          |
|---|-----------|---|---|---------|----------------------------------------------------------------------------|----------------------------------------------------------------------------------------------------------------------------------------------------------------------------------------------------------------------------------------------------------|
| 8 | 68075995  | C | T | CSPP1   | NM_001291339,NM_024790                                                     | CSPP1:NM_001291339:exon18:c.C1622T:p.P541L,CSPP1:NM_024790:exon21:c.C2657T:p.P886L                                                                                                                                                                       |
| 8 | 77775961  | G | T | ZFHX4   | NM_024721                                                                  | ZFHX4:NM_024721:exon11:c.G10011T:p.Q3337H                                                                                                                                                                                                                |
| 8 | 94805495  | C | T | TMEM67  | NM_001142301,NM_153704                                                     | TMEM67:NM_153704:exon16:c.C1645T:p.R549C,TMEM67:NM_001142301:exon17:c.C1402T:p.R468C                                                                                                                                                                     |
| 8 | 103842137 | G | A | AZIN1   | NM_001301668,NM_015878,NM_148174                                           | AZIN1:NM_001301668:exon10:c.C932T:p.A311V,AZIN1:NM_148174:exon10:c.C932T:p.A311V,AZIN1:NM_015878:exon11:c.C932T:p.A311V                                                                                                                                  |
| 8 | 104928774 | G | T | RIMS2   | NM_001100117,NM_001282881,NM_014677                                        | .                                                                                                                                                                                                                                                        |
| 8 | 107773623 | T | C | ABRA    | NM_139166                                                                  | ABRA:NM_139166:exon2:c.A788G:p.N263S                                                                                                                                                                                                                     |
| 8 | 121259936 | C | T | COL14A1 | NM_021110                                                                  | COL14A1:NM_021110:exon21:c.C2564T:p.P855L                                                                                                                                                                                                                |
| 8 | 130760802 | G | A | GSDMC   | NM_031415                                                                  | GSDMC:NM_031415:exon14:c.C1472T:p.P491L                                                                                                                                                                                                                  |
| 8 | 135545203 | C | T | ZFAT    | NM_001029939,NM_001167583,NM_001174157,NM_001174158,NM_001289394,NM_020863 | ZFAT:NM_001174157:exon11:c.G2803A:p.A935T,ZFAT:NM_001167583:exon12:c.G2953A:p.A985T,ZFAT:NM_001174158:exon12:c.G2953A:p.A985T,ZFAT:NM_020863:exon12:c.G2989A:p.A997T,ZFAT:NM_001029939:exon13:c.G2953A:p.A985T,ZFAT:NM_001289394:exon13:c.G2953A:p.A985T |
| 8 | 140744344 | G | A | TRAPPC9 | NM_001160372,NM_031466                                                     | TRAPPC9:NM_001160372:exon22:c.C3157T:p.R1053C,TRAPPC9:NM_031466:exon22:c.C3451T:p.R1151C                                                                                                                                                                 |
| 8 | 142185385 | C | G | DENND3  | NM_014957                                                                  | DENND3:NM_014957:exon14:c.C2122G:p.L708V                                                                                                                                                                                                                 |
| 8 | 145106273 | T | A | OPLAH   | NM_017570                                                                  | OPLAH:NM_017570:exon28:c.A3821T:p.E1274V                                                                                                                                                                                                                 |
| 8 | 145154282 | G | A | SHARPIN | NM_030974                                                                  | SHARPIN:NM_030974:exon6:c.C820T:p.R274W                                                                                                                                                                                                                  |
| 9 | 712757    | C | T | KANK1   | NM_001256876,NM_001256877,NM_015158,NM_153186                              | KANK1:NM_153186:exon2:c.C1517T:p.A506V,KANK1:NM_015158:exon3:c.C1991T:p.A664V,KANK1:NM_001256877:exon4:c.C1991T:p.A664V,KANK1:NM_001256876:exon7:c.C1991T:p.A664V                                                                                        |
| 9 | 4618086   | T | C | SPATA6L | NM_001039395                                                               | SPATA6L:NM_001039395:exon8:c.A658G:p.I220V                                                                                                                                                                                                               |
| 9 | 5044432   | G | A | JAK2    | NM_004972                                                                  | JAK2:NM_004972:exon5:c.G380A:p.G127D                                                                                                                                                                                                                     |
| 9 | 17298289  | C | T | CNTLN   | NM_001114395,NM_017738                                                     | CNTLN:NM_001114395:exon7:c.C1085T:p.T362I,CNTLN:NM_017738:exon7:c.C1085T:p.T362I                                                                                                                                                                         |
| 9 | 33941702  | C | T | UBAP2   | NM_001282529,NM_018449                                                     | UBAP2:NM_001282529:exon12:c.G1073A:p.R358K,UBAP2:NM_018449:exon16:c.G1874A:p.R625K                                                                                                                                                                       |

|   |           |   |   |         |                                                  |                                                                                                                                                                              |
|---|-----------|---|---|---------|--------------------------------------------------|------------------------------------------------------------------------------------------------------------------------------------------------------------------------------|
| 9 | 35377549  | G | A | UNC13B  | NM_006377                                        | UNC13B:NM_006377:exon15:c.G1673A:p.R558Q                                                                                                                                     |
| 9 | 35389944  | G | C | UNC13B  | NM_006377                                        | UNC13B:NM_006377:exon24:c.G2949C:p.K983N                                                                                                                                     |
| 9 | 35906604  | A | C | HRCT1   | NM_001039792                                     | HRCT1:NM_001039792:exon1:c.A320C:p.H107P                                                                                                                                     |
| 9 | 37801374  | G | A | DCAF10  | NM_024345                                        | DCAF10:NM_024345:exon1:c.G511A:p.V171I                                                                                                                                       |
| 9 | 72874183  | A | C | SMC5    | NM_015110                                        | .                                                                                                                                                                            |
| 9 | 86504035  | T | A | KIF27   | NM_001271927,NM_001271928,NM_017576              | KIF27:NM_001271927:exon7:c.A1943T:p.D648V,KIF27:NM_001271928:exon7:c.A1943T:p.D648V,KIF27:NM_017576:exon7:c.A1943T:p.D648V                                                   |
| 9 | 88960693  | C | T | ZCCHC6  | NM_001185059,NM_001185074,NM_024617              | ZCCHC6:NM_001185059:exon4:c.G710A:p.R237Q,ZCCHC6:NM_001185074:exon4:c.G710A:p.R237Q,ZCCHC6:NM_024617:exon4:c.G710A:p.R237Q                                                   |
| 9 | 91616590  | G | T | S1PR3   | NM_005226                                        | S1PR3:NM_005226:exon2:c.G475T:p.G159W                                                                                                                                        |
| 9 | 94797146  | G | A | SPTLC1  | NM_001281303,NM_006415                           | SPTLC1:NM_001281303:exon14:c.C1274T:p.A425V,SPTLC1:NM_006415:exon14:c.C1274T:p.A425V                                                                                         |
| 9 | 95055715  | A | T | IARS    | NM_013417                                        | .                                                                                                                                                                            |
| 9 | 95063881  | C | T | NOL8    | NM_001256394,NM_017948                           | NOL8:NM_017948:exon13:c.G3127A:p.G1043R,NOL8:NM_001256394:exon14:c.G2923A:p.G975R                                                                                            |
| 9 | 96289514  | A | T | FAM120A | NM_001286722,NM_001286723,NM_001286724,NM_014612 | FAM120A:NM_001286722:exon8:c.A1493T:p.D498V,FAM120A:NM_001286723:exon8:c.A1496T:p.D499V,FAM120A:NM_001286724:exon8:c.A1496T:p.D499V,FAM120A:NM_014612:exon8:c.A1496T:p.D499V |
| 9 | 97333800  | C | A | FBP2    | NM_003837                                        | FBP2:NM_003837:exon4:c.G511T:p.A171S                                                                                                                                         |
| 9 | 99250506  | C | T | HABP4   | NM_014282                                        | HABP4:NM_014282:exon7:c.C1135T:p.R379W                                                                                                                                       |
| 9 | 101536290 | G | T | ANKS6   | NM_173551                                        | ANKS6:NM_173551:exon9:c.C1690A:p.P564T                                                                                                                                       |
| 9 | 101594151 | G | A | GALNT12 | NM_024642                                        | GALNT12:NM_024642:exon4:c.G829A:p.G277S                                                                                                                                      |
| 9 | 107288586 | T | C | OR13C4  | NM_001001919                                     | OR13C4:NM_001001919:exon1:c.A905G:p.D302G                                                                                                                                    |
| 9 | 107298322 | A | G | OR13C3  | NM_001001961                                     | OR13C3:NM_001001961:exon1:c.T773C:p.M258T                                                                                                                                    |
| 9 | 113013711 | C | T | TXN     | NM_001244938,NM_003329                           | TXN:NM_001244938:exon2:c.G56A:p.G19D,TXN:NM_003329:exon2:c.G56A:p.G19D                                                                                                       |
| 9 | 113547891 | G | A | MUSK    | NM_001166280,NM_001166281,NM_005592              | MUSK:NM_001166281:exon10:c.G1383A:p.M461I,MUSK:NM_001166280:exon11:c.G1413A:p.M471I,MUSK:NM_005592:exon12:c.G1671A:p.M557I                                                   |
| 9 | 116812116 | A | C | ZNF618  | NM_133374                                        | ZNF618:NM_133374:exon14:c.A2255C:p.D752A                                                                                                                                     |

|   |           |   |   |        |                                                                                      |                                                                                                                                                                                                                                                                                          |
|---|-----------|---|---|--------|--------------------------------------------------------------------------------------|------------------------------------------------------------------------------------------------------------------------------------------------------------------------------------------------------------------------------------------------------------------------------------------|
| 9 | 116812124 | C | T | ZNF618 | NM_133374                                                                            | ZNF618:NM_133374:exon14:c.C2263T:p.P755S                                                                                                                                                                                                                                                 |
| 9 | 117136363 | G | A | AKNA   | NM_030767                                                                            | .                                                                                                                                                                                                                                                                                        |
| 9 | 117838677 | G | A | TNC    | NM_002160                                                                            | TNC:NM_002160:exon8:c.C2852T:p.T951I                                                                                                                                                                                                                                                     |
| 9 | 119249734 | G | A | ASTN2  | NM_001184734,NM_014010,NM_198186,NM_198187,NM_198188                                 | ASTN2:NM_001184734:exon5:c.C557T:p.T186I,ASTN2:NM_198186:exon5:c.C704T:p.T235I,ASTN2:NM_198187:exon5:c.C557T:p.T186I,ASTN2:NM_198188:exon5:c.C557T:p.T186I,ASTN2:NM_014010:exon19:c.C3248T:p.T1083I                                                                                      |
| 9 | 119976780 | T | A | ASTN2  | NM_014010                                                                            | ASTN2:NM_014010:exon3:c.A872T:p.D291V                                                                                                                                                                                                                                                    |
| 9 | 125145963 | A | G | PTGS1  | NM_000962,NM_001271164,NM_001271165,NM_001271166,NM_001271367,NM_001271368,NM_080591 | PTGS1:NM_001271164:exon7:c.A794G:p.D265G,PTGS1:NM_001271165:exon7:c.A611G:p.D204G,PTGS1:NM_000962:exon8:c.A938G:p.D313G,PTGS1:NM_001271166:exon8:c.A611G:p.D204G,PTGS1:NM_001271367:exon8:c.A611G:p.D204G,PTGS1:NM_080591:exon8:c.A938G:p.D313G,PTGS1:NM_001271368:exon9:c.A863G:p.D288G |
| 9 | 128001326 | C | T | HSPA5  | NM_005347                                                                            | HSPA5:NM_005347:exon5:c.G890A:p.R297Q                                                                                                                                                                                                                                                    |
| 9 | 130493004 | T | G | TTC16  | NM_144965                                                                            | TTC16:NM_144965:exon14:c.T1942G:p.S648A                                                                                                                                                                                                                                                  |
| 9 | 131072140 | G | A | TRUB2  | NM_015679                                                                            | TRUB2:NM_015679:exon8:c.C685T:p.H229Y                                                                                                                                                                                                                                                    |
| 9 | 133787235 | C | T | FIBCD1 | NM_001145106,NM_032843                                                               | FIBCD1:NM_032843:exon5:c.G890A:p.R297Q,FIBCD1:NM_001145106:exon6:c.G890A:p.R297Q                                                                                                                                                                                                         |
| 9 | 135117313 | C | A | NTNG2  | NM_032536                                                                            | NTNG2:NM_032536:exon8:c.C1408A:p.L470M                                                                                                                                                                                                                                                   |
| 9 | 136522275 | G | A | DBH    | NM_000787                                                                            | DBH:NM_000787:exon11:c.G1646A:p.R549H                                                                                                                                                                                                                                                    |
| 9 | 138657001 | T | C | KCNT1  | NM_001272003,NM_020822                                                               | KCNT1:NM_001272003:exon11:c.T1025C:p.M342T,KCNT1:NM_020822:exon12:c.T1160C:p.M387T                                                                                                                                                                                                       |
| 9 | 139749495 | G | A | MAMDC4 | NM_206920                                                                            | MAMDC4:NM_206920:exon10:c.G1130A:p.R377H                                                                                                                                                                                                                                                 |
| 9 | 140001194 | G | A | MAN1B1 | NM_016219                                                                            | MAN1B1:NM_016219:exon10:c.G1499A:p.R500Q                                                                                                                                                                                                                                                 |
| 9 | 140007915 | C | T | DPP7   | NM_013379                                                                            | DPP7:NM_013379:exon5:c.G519A:p.M173I                                                                                                                                                                                                                                                     |
| 9 | 140110727 | C | T | NDOR1  | NM_001144026,NM_001144027,NM_001144028,NM_014434                                     | NDOR1:NM_001144027:exon13:c.C1529T:p.T510M                                                                                                                                                                                                                                               |
| 9 | 140323749 | C | T | NOXA1  | NM_001256067,NM_006647                                                               | NOXA1:NM_001256067:exon5:c.C526T:p.R176W,NOXA1:NM_006647:exon5:c.C526T:p.R176W                                                                                                                                                                                                           |
| 9 | 140446879 | A | G | MRPL41 | NM_032477                                                                            | MRPL41:NM_032477:exon2:c.A346G:p.K116E                                                                                                                                                                                                                                                   |

|    |           |   |   |                    |                                                  |                                                                                                                                                                      |
|----|-----------|---|---|--------------------|--------------------------------------------------|----------------------------------------------------------------------------------------------------------------------------------------------------------------------|
| 9  | 140777306 | C | G | CACNA1B            | NM_000718,NM_001243812                           | CACNA1B:NM_000718:exon3:c.C501G:p.N167K,CACNA1B:NM_001243812:exon3:c.C501G:p.N167K                                                                                   |
| 10 | 1279729   | G | A | ADARB2             | NM_018702                                        | ADARB2:NM_018702:exon6:c.C1420T:p.R474W                                                                                                                              |
| 10 | 5437430   | G | A | TUBAL3             | NM_001171864,NM_024803                           | TUBAL3:NM_001171864:exon3:c.C136T:p.R46W,TUBAL3:NM_024803:exon3:c.C256T:p.R86W                                                                                       |
| 10 | 7218090   | C | T | SFMBT2             | NM_001018039,NM_001029880                        | SFMBT2:NM_001018039:exon17:c.G1846A:p.V616I,SFMBT2:NM_001029880:exon17:c.G1846A:p.V616I                                                                              |
| 10 | 16990479  | G | A | CUBN               | NM_001081                                        | CUBN:NM_001081:exon35:c.C5207T:p.S1736L                                                                                                                              |
| 10 | 19678479  | A | G | MALRD1             | NM_001142308                                     | MALRD1:NM_001142308:exon28:c.A4786G:p.M1596V                                                                                                                         |
| 10 | 21435321  | G | T | C10orf113          | NM_001010896,NM_001177483                        | C10orf113:NM_001010896:exon1:c.C117A:p.N39K,C10orf113:NM_001177483:exon1:c.C117A:p.N39K                                                                              |
| 10 | 27035311  | A | G | PDSS1              | NM_014317                                        | PDSS1:NM_014317:exon12:c.A1157G:p.E386G                                                                                                                              |
| 10 | 29783908  | A | G | SVIL               | NM_003174,NM_021738                              | SVIL:NM_003174:exon18:c.T2498C:p.M833T,SVIL:NM_021738:exon20:c.T3776C:p.M1259T                                                                                       |
| 10 | 29784072  | G | C | SVIL               | NM_003174,NM_021738                              | SVIL:NM_003174:exon17:c.C2425G:p.P809A,SVIL:NM_021738:exon19:c.C3703G:p.P1235A                                                                                       |
| 10 | 29813481  | G | A | SVIL               | NM_003174,NM_021738                              | SVIL:NM_003174:exon12:c.C1228T:p.R410W,SVIL:NM_021738:exon14:c.C2506T:p.R836W                                                                                        |
| 10 | 30315269  | G | A | KIAA1462           | NM_020848                                        | KIAA1462:NM_020848:exon3:c.C3808T:p.R1270W                                                                                                                           |
| 10 | 44053013  | G | C | ZNF239             | NM_001099282,NM_001099283,NM_001099284,NM_005674 | ZNF239:NM_001099283:exon2:c.C515G:p.A172G,ZNF239:NM_005674:exon2:c.C515G:p.A172G,ZNF239:NM_001099284:exon3:c.C515G:p.A172G,ZNF239:NM_001099282:exon4:c.C515G:p.A172G |
| 10 | 46998995  | C | G | GPRIN2             | NM_014696                                        | GPRIN2:NM_014696:exon3:c.C115G:p.L39V                                                                                                                                |
| 10 | 46999019  | G | A | GPRIN2             | NM_014696                                        | GPRIN2:NM_014696:exon3:c.G139A:p.V47M                                                                                                                                |
| 10 | 46999484  | G | T | GPRIN2             | NM_014696                                        | GPRIN2:NM_014696:exon3:c.G604T:p.G202W                                                                                                                               |
| 10 | 46999922  | G | T | GPRIN2             | NM_014696                                        | GPRIN2:NM_014696:exon3:c.G1042T:p.V348L                                                                                                                              |
| 10 | 47087078  | G | T | NPY4R,LOC100996758 | NM_001278794,NM_001278795,NM_005972              | LOC100996758:NM_001278795:exon1:c.G295T:p.A99S,NPY4R:NM_001278794:exon2:c.G295T:p.A99S,NPY4R:NM_005972:exon3:c.G295T:p.A99S                                          |
| 10 | 47087501  | C | T | NPY4R,LOC100996758 | NM_001278794,NM_001278795,NM_005972              | LOC100996758:NM_001278795:exon1:c.C718T:p.R240C,NPY4R:NM_001278794:exon2:c.C718T:p.R240C,NPY4R:NM_005972:exon3:c.C718T:p.R240C                                       |



|    |          |   |   |          |                                                                                                                                                          |                                                                                                                                                                                                                                                                                                                                                              |
|----|----------|---|---|----------|----------------------------------------------------------------------------------------------------------------------------------------------------------|--------------------------------------------------------------------------------------------------------------------------------------------------------------------------------------------------------------------------------------------------------------------------------------------------------------------------------------------------------------|
|    |          |   |   | 8        |                                                                                                                                                          |                                                                                                                                                                                                                                                                                                                                                              |
| 10 | 48388228 | C | T | RBP3     | NM_002900                                                                                                                                                | RBP3:NM_002900:exon1:c.G2650A:p.V884M                                                                                                                                                                                                                                                                                                                        |
| 10 | 50669489 | T | C | ERCC6    | NM_000124                                                                                                                                                | ERCC6:NM_000124:exon19:c.A3892G:p.R1298G                                                                                                                                                                                                                                                                                                                     |
| 10 | 55944949 | T | C | PCDH15   | NM_001142763,NM_001142764,NM_001142765,NM_001142766,NM_001142767,NM_001142768,NM_001142769,NM_001142770,NM_001142771,NM_001142772,NM_001142773,NM_033056 | PCDH15:NM_001142767:exon11:c.A1274G:p.Y425C,PCDH15:NM_001142768:exon11:c.A1319G:p.Y440C,PCDH15:NM_001142773:exon11:c.A1319G:p.Y440C,PCDH15:NM_001142764:exon12:c.A1385G:p.Y462C,PCDH15:NM_001142765:exon12:c.A1385G:p.Y462C,PCDH15:NM_001142766:exon12:c.A1385G:p.Y462C,PCDH15:NM_033056:exon12:c.A1385G:p.Y462C,PCDH15:NM_001142763:exon13:c.A1400G:p.Y467C |
| 10 | 70404467 | A | C | TET1     | NM_030625                                                                                                                                                | TET1:NM_030625:exon4:c.A1981C:p.N661H                                                                                                                                                                                                                                                                                                                        |
| 10 | 70847918 | T | C | SRGN     | NM_002727                                                                                                                                                | SRGN:NM_002727:exon1:c.T5C:p.M2T                                                                                                                                                                                                                                                                                                                             |
| 10 | 70992549 | G | A | HKDC1    | NM_025130                                                                                                                                                | HKDC1:NM_025130:exon3:c.G256A:p.G86R                                                                                                                                                                                                                                                                                                                         |
| 10 | 72014877 | G | A | NPFFR1   | NM_022146                                                                                                                                                | NPFFR1:NM_022146:exon4:c.C1129T:p.R377W                                                                                                                                                                                                                                                                                                                      |
| 10 | 73472415 | C | T | CDH23    | NM_001171930,NM_022124                                                                                                                                   | .                                                                                                                                                                                                                                                                                                                                                            |
| 10 | 73492032 | T | C | CDH23    | NM_001171930,NM_022124                                                                                                                                   | CDH23:NM_001171930:exon31:c.T4004C:p.V1335A,CDH23:NM_022124:exon31:c.T4004C:p.V1335A                                                                                                                                                                                                                                                                         |
| 10 | 74899468 | T | A | ECD      | NM_001135752,NM_001135753,NM_007265                                                                                                                      | ECD:NM_001135753:exon9:c.A1026T:p.E342D,ECD:NM_007265:exon10:c.A1155T:p.E385D,ECD:NM_001135752:exon11:c.A1254T:p.E418D                                                                                                                                                                                                                                       |
| 10 | 74999077 | C | A | FAM149B1 | NM_173348                                                                                                                                                | FAM149B1:NM_173348:exon13:c.C1610A:p.T537K                                                                                                                                                                                                                                                                                                                   |
| 10 | 76994918 | G | A | COMTD1   | NM_144589                                                                                                                                                | COMTD1:NM_144589:exon4:c.C347T:p.S116F                                                                                                                                                                                                                                                                                                                       |
| 10 | 85944516 | G | T | C10orf99 | NM_207373                                                                                                                                                | C10orf99:NM_207373:exon3:c.G240T:p.Q80H                                                                                                                                                                                                                                                                                                                      |
| 10 | 96121503 | G | T | NOC3L    | NM_022451                                                                                                                                                | NOC3L:NM_022451:exon2:c.C136A:p.Q46K                                                                                                                                                                                                                                                                                                                         |
| 10 | 97023725 | C | A | PDLIM1   | NM_020992                                                                                                                                                | PDLIM1:NM_020992:exon4:c.G429T:p.Q143H                                                                                                                                                                                                                                                                                                                       |
| 10 | 97200941 | T | C | SORBS1   | NM_001290294,NM_001290295,NM_015385,NM_024991                                                                                                            | .                                                                                                                                                                                                                                                                                                                                                            |
| 10 | 97919631 | G | C | ZNF518A  | NM_001278524,NM_001278525,NM_001278526,NM_014803                                                                                                         | UNKNOWN                                                                                                                                                                                                                                                                                                                                                      |

|    |           |   |   |          |                                               |                                                                                                                                                                     |
|----|-----------|---|---|----------|-----------------------------------------------|---------------------------------------------------------------------------------------------------------------------------------------------------------------------|
| 10 | 98080388  | T | C | DNTT     | NM_001017520,NM_004088                        | DNTT:NM_001017520:exon4:c.T521C:p.I174T,DNTT:NM_004088:exon4:c.T521C:p.I174T                                                                                        |
| 10 | 99139505  | A | T | RRP12    | NM_001145114,NM_001284337,NM_015179           | RRP12:NM_001284337:exon11:c.T1256A:p.L419Q,RRP12:NM_001145114:exon12:c.T1373A:p.L458Q,RRP12:NM_015179:exon14:c.T1556A:p.L519Q                                       |
| 10 | 101560288 | C | T | ABCC2    | NM_000392                                     | ABCC2:NM_000392:exon9:c.C1177T:p.R393W                                                                                                                              |
| 10 | 101668723 | A | G | DNMBP    | NM_015221                                     | DNMBP:NM_015221:exon5:c.T2441C:p.M814T                                                                                                                              |
| 10 | 102762659 | G | A | LZTS2    | NM_032429                                     | LZTS2:NM_032429:exon2:c.G364A:p.G122S                                                                                                                               |
| 10 | 103917272 | A | G | NOLC1    | NM_001284388,NM_001284389,NM_004741           | NOLC1:NM_001284388:exon4:c.A401G:p.D134G,NOLC1:NM_001284389:exon4:c.A404G:p.D135G,NOLC1:NM_004741:exon4:c.A401G:p.D134G                                             |
| 10 | 105793739 | T | C | COL17A1  | NM_000494                                     | COL17A1:NM_000494:exon52:c.A4120G:p.N1374D                                                                                                                          |
| 10 | 115366006 | G | T | NRAP     | NM_001261463,NM_006175,NM_198060              | NRAP:NM_006175:exon32:c.C3633A:p.H1211Q,NRAP:NM_001261463:exon33:c.C3738A:p.H1246Q,NRAP:NM_198060:exon33:c.C3738A:p.H1246Q                                          |
| 10 | 115529558 | G | C | PLEKHS1  | NM_001193434,NM_001193435,NM_024889,NM_182601 | PLEKHS1:NM_001193435:exon5:c.G187C:p.G63R,PLEKHS1:NM_182601:exon6:c.G433C:p.G145R,PLEKHS1:NM_001193434:exon7:c.G187C:p.G63R,PLEKHS1:NM_024889:exon7:c.G451C:p.G151R |
| 10 | 118386509 | G | A | PNLIPRP2 | NM_005396                                     | UNKNOWN                                                                                                                                                             |
| 10 | 121286832 | C | T | RGS10    | NM_001005339,NM_002925                        | RGS10:NM_001005339:exon2:c.G154A:p.V52M,RGS10:NM_002925:exon2:c.G112A:p.V38M                                                                                        |
| 10 | 126519970 | C | G | FAM175B  | NM_032182                                     | FAM175B:NM_032182:exon8:c.C716G:p.A239G                                                                                                                             |
| 10 | 129911856 | C | G | MKI67    | NM_001145966,NM_002417                        | MKI67:NM_001145966:exon7:c.G411C:p.E137D,MKI67:NM_002417:exon8:c.G1491C:p.E497D                                                                                     |
| 10 | 134013904 | G | A | DPYSL4   | NM_006426                                     | DPYSL4:NM_006426:exon9:c.G856A:p.D286N                                                                                                                              |
| 10 | 134650370 | C | T | CFAP46   | NM_001200049                                  | CFAP46:NM_001200049:exon45:c.G6487A:p.E2163K                                                                                                                        |
| 10 | 135342034 | G | A | CYP2E1   | NM_000773                                     | CYP2E1:NM_000773:exon2:c.G227A:p.R76H                                                                                                                               |
| 11 | 1213424   | A | G | MUC5AC   | NM_001304359                                  | UNKNOWN                                                                                                                                                             |
| 11 | 1213440   | T | C | MUC5AC   | NM_001304359                                  | UNKNOWN                                                                                                                                                             |
| 11 | 2436476   | G | A | TRPM5    | NM_014555                                     | TRPM5:NM_014555:exon9:c.C1354T:p.R452W                                                                                                                              |
| 11 | 4411623   | C | T | TRIM21   | NM_003141                                     | TRIM21:NM_003141:exon2:c.G17A:p.R6H                                                                                                                                 |
| 11 | 5153821   | C | T | OR52A5   | NM_001005160                                  | OR52A5:NM_001005160:exon1:c.G52A:p.G18R                                                                                                                             |

|    |          |   |   |          |                                                                       |                                                                                                                                                                                                                                                                    |
|----|----------|---|---|----------|-----------------------------------------------------------------------|--------------------------------------------------------------------------------------------------------------------------------------------------------------------------------------------------------------------------------------------------------------------|
| 11 | 5344737  | T | A | OR51B2   | NM_033180                                                             | OR51B2:NM_033180:exon1:c.A791T:p.K264M                                                                                                                                                                                                                             |
| 11 | 5510553  | C | T | OR52D1   | NM_001005163                                                          | OR52D1:NM_001005163:exon1:c.C617T:p.A206V                                                                                                                                                                                                                          |
| 11 | 6239315  | G | A | FAM160A2 | NM_001098794,NM_032127                                                | FAM160A2:NM_001098794:exon9:c.C1501T:p.R501C,FAM160A2:NM_032127:exon9:c.C1543T:p.R515C                                                                                                                                                                             |
| 11 | 6530401  | G | C | DNHD1    | NM_144666,NM_173589                                                   | DNHD1:NM_173589:exon5:c.G1134C:p.K378N,DNHD1:NM_144666:exon6:c.G1134C:p.K378N                                                                                                                                                                                      |
| 11 | 7689026  | T | G | CYB5R2   | NM_001302826,NM_001302827,NM_016229                                   | CYB5R2:NM_001302827:exon6:c.A491C:p.Q164P,CYB5R2:NM_001302826:exon7:c.A491C:p.Q164P,CYB5R2:NM_016229:exon7:c.A491C:p.Q164P                                                                                                                                         |
| 11 | 8646450  | T | G | TRIM66   | NM_014818                                                             | TRIM66:NM_014818:exon11:c.A2201C:p.Q734P                                                                                                                                                                                                                           |
| 11 | 8706353  | T | G | RPL27A   | NM_000990                                                             | RPL27A:NM_000990:exon4:c.T232G:p.L78V                                                                                                                                                                                                                              |
| 11 | 17635225 | A | C | OTOG     | NM_001277269,NM_001292063                                             | OTOG:NM_001277269:exon38:c.A6541C:p.T2181P,OTOG:NM_001292063:exon39:c.A6505C:p.T2169P                                                                                                                                                                              |
| 11 | 18956196 | C | T | MRGPRX1  | NM_147199                                                             | MRGPRX1:NM_147199:exon1:c.G136A:p.A46T                                                                                                                                                                                                                             |
| 11 | 27016411 | A | G | FIBIN    | NM_203371                                                             | FIBIN:NM_203371:exon1:c.A338G:p.E113G                                                                                                                                                                                                                              |
| 11 | 44076808 | C | A | ACCSL    | NM_001031854                                                          | ACCSL:NM_001031854:exon9:c.C1106A:p.S369Y                                                                                                                                                                                                                          |
| 11 | 46354997 | C | T | DGKZ     | NM_201532                                                             | DGKZ:NM_201532:exon1:c.C172T:p.R58C                                                                                                                                                                                                                                |
| 11 | 57256441 | T | C | SLC43A1  | NM_001198810,NM_003627                                                | SLC43A1:NM_001198810:exon13:c.A1357G:p.T453A,SLC43A1:NM_003627:exon13:c.A1357G:p.T453A                                                                                                                                                                             |
| 11 | 62288061 | C | T | AHNAK    | NM_001620                                                             | AHNAK:NM_001620:exon5:c.G13828A:p.D4610N                                                                                                                                                                                                                           |
| 11 | 62598564 | G | A | STX5     | NM_001244666,NM_003164                                                | STX5:NM_001244666:exon2:c.C152T:p.P51L,STX5:NM_003164:exon2:c.C152T:p.P51L                                                                                                                                                                                         |
| 11 | 63067061 | C | T | SLC22A10 | NM_001039752                                                          | SLC22A10:NM_001039752:exon6:c.C1030T:p.P344S                                                                                                                                                                                                                       |
| 11 | 63586472 | C | T | C11orf84 | NM_138471                                                             | C11orf84:NM_138471:exon5:c.C932T:p.P311L                                                                                                                                                                                                                           |
| 11 | 64575505 | C | T | MEN1     | NM_000244,NM_130799,NM_130800,NM_130801,NM_130802,NM_130803,NM_130804 | MEN1:NM_000244:exon3:c.G527A:p.R176Q,MEN1:NM_130799:exon3:c.G512A:p.R171Q,MEN1:NM_130800:exon3:c.G527A:p.R176Q,MEN1:NM_130801:exon3:c.G527A:p.R176Q,MEN1:NM_130802:exon3:c.G527A:p.R176Q,MEN1:NM_130803:exon3:c.G527A:p.R176Q,MEN1:NM_130804:exon4:c.G527A:p.R176Q |
| 11 | 66281952 | G | A | BBS1     | NM_024649                                                             | BBS1:NM_024649:exon4:c.G235A:p.E79K                                                                                                                                                                                                                                |
| 11 | 68855341 | A | G | TPCN2    | NM_139075                                                             | .                                                                                                                                                                                                                                                                  |

|    |           |   |   |        |                                                  |                                                                                                                                                                    |
|----|-----------|---|---|--------|--------------------------------------------------|--------------------------------------------------------------------------------------------------------------------------------------------------------------------|
| 11 | 70331960  | G | T | SHANK2 | NM_012309,NM_133266                              | SHANK2:NM_133266:exon10:c.C2674A:p.P892T                                                                                                                           |
| 11 | 72418416  | G | C | ARAP1  | NM_001040118,NM_001135190,NM_015242              | ARAP1:NM_001135190:exon10:c.C792G:p.F264L,ARAP1:NM_015242:exon10:c.C792G:p.F264L,ARAP1:NM_001040118:exon12:c.C1527G:p.F509L                                        |
| 11 | 74556109  | C | T | XRRA1  | NM_001270380,NM_001270381,NM_182969              | .                                                                                                                                                                  |
| 11 | 76969468  | G | A | GDPD4  | NM_182833                                        | GDPD4:NM_182833:exon10:c.C827T:p.S276L                                                                                                                             |
| 11 | 82895905  | A | G | PCF11  | NM_015885                                        | PCF11:NM_015885:exon16:c.A4637G:p.K1546R                                                                                                                           |
| 11 | 94862502  | A | G | ENDOD1 | NM_015036                                        | ENDOD1:NM_015036:exon2:c.A1262G:p.K421R                                                                                                                            |
| 11 | 95568581  | G | C | MTMR2  | NM_001243571,NM_016156,NM_201278,NM_201281       | MTMR2:NM_016156:exon15:c.C1805G:p.A602G,MTMR2:NM_201281:exon16:c.C1589G:p.A530G,MTMR2:NM_201278:exon17:c.C1589G:p.A530G,MTMR2:NM_001243571:exon18:c.C1589G:p.A530G |
| 11 | 102248317 | A | G | BIRC2  | NM_001166,NM_001256163,NM_001256166              | BIRC2:NM_001166:exon7:c.A1457G:p.N486S,BIRC2:NM_001256163:exon7:c.A1457G:p.N486S,BIRC2:NM_001256166:exon7:c.A1310G:p.N437S                                         |
| 11 | 103907858 | G | C | DDI1   | NM_001001711                                     | DDI1:NM_001001711:exon1:c.G308C:p.G103A                                                                                                                            |
| 11 | 111941175 | G | T | PIH1D2 | NM_001082619,NM_138789                           | PIH1D2:NM_001082619:exon5:c.C798A:p.D266E,PIH1D2:NM_138789:exon5:c.C798A:p.D266E                                                                                   |
| 11 | 113846041 | G | T | HTR3A  | NM_000869,NM_213621                              | HTR3A:NM_000869:exon1:c.G12T:p.K4N,HTR3A:NM_213621:exon1:c.G12T:p.K4N                                                                                              |
| 11 | 118185215 | G | A | CD3E   | NM_000733                                        | .                                                                                                                                                                  |
| 11 | 118376737 | A | G | KMT2A  | NM_001197104,NM_005933                           | KMT2A:NM_001197104:exon27:c.A10130G:p.D3377G,KMT2A:NM_005933:exon27:c.A10121G:p.D3374G                                                                             |
| 11 | 118509676 | G | A | PHLDB1 | NM_001144758,NM_001144759,NM_015157              | PHLDB1:NM_001144758:exon11:c.G2603A:p.R868H,PHLDB1:NM_001144759:exon11:c.G2603A:p.R868H,PHLDB1:NM_015157:exon12:c.G2603A:p.R868H                                   |
| 11 | 118518751 | G | A | PHLDB1 | NM_001144758,NM_001144759,NM_015157              | PHLDB1:NM_001144759:exon17:c.G3472A:p.V1158I,PHLDB1:NM_001144758:exon18:c.G3613A:p.V1205I,PHLDB1:NM_015157:exon19:c.G3613A:p.V1205I                                |
| 11 | 118532376 | A | G | TREH   | NM_007180                                        | UNKNOWN                                                                                                                                                            |
| 11 | 119045520 | G | A | NLRX1  | NM_001282143,NM_001282144,NM_001282358,NM_024618 | NLRX1:NM_001282143:exon6:c.G1208A:p.R403H,NLRX1:NM_001282144:exon6:c.G1208A:p.R403H,NLRX1:NM_001282358:exon6:c.G1208A:p.R403                                       |

|    |           |   |   |          |                                               |                                                                                                                                                       |
|----|-----------|---|---|----------|-----------------------------------------------|-------------------------------------------------------------------------------------------------------------------------------------------------------|
|    |           |   |   |          |                                               | H,NLRX1:NM_024618:exon6:c.G1208A:p.R403H                                                                                                              |
| 11 | 119243866 | C | T | USP2     | NM_004205                                     | USP2:NM_004205:exon2:c.G325A:p.G109R                                                                                                                  |
| 11 | 130109776 | C | G | ZBTB44   | NM_001301098,NM_001301099,NM_014155           | ZBTB44:NM_001301098:exon3:c.G1034C:p.G345A,ZBTB44:NM_001301099:exon3:c.G1034C:p.G345A,ZBTB44:NM_014155:exon3:c.G1034C:p.G345A                         |
| 11 | 130750661 | G | A | SNX19    | NM_001301089,NM_014758                        | SNX19:NM_001301089:exon9:c.C754T:p.R252C,SNX19:NM_014758:exon9:c.C2614T:p.R872C                                                                       |
| 12 | 6640531   | A | G | NCAPD2   | NM_014865                                     | NCAPD2:NM_014865:exon32:c.A4159G:p.K1387E                                                                                                             |
| 12 | 6729676   | A | G | LPAR5    | NM_001142961,NM_020400                        | LPAR5:NM_001142961:exon2:c.T739C:p.F247L,LPAR5:NM_020400:exon2:c.T739C:p.F247L                                                                        |
| 12 | 6976687   | G | A | TPI1     | NM_001159287                                  | TPI1:NM_001159287:exon1:c.G68A:p.R23Q                                                                                                                 |
| 12 | 11139458  | A | G | TAS2R50  | NM_176890                                     | TAS2R50:NM_176890:exon1:c.T2C:p.M1T                                                                                                                   |
| 12 | 18891318  | G | A | CAPZA3   | NM_033328                                     | CAPZA3:NM_033328:exon1:c.G116A:p.R39H                                                                                                                 |
| 12 | 21036413  | A | C | SLCO1B3  | NM_019844                                     | SLCO1B3:NM_019844:exon13:c.A1559C:p.H520P                                                                                                             |
| 12 | 21375289  | C | T | SLCO1B1  | NM_006446                                     | SLCO1B1:NM_006446:exon13:c.C1738T:p.R580X                                                                                                             |
| 12 | 24048776  | G | A | SOX5     | NM_001261414,NM_001261415,NM_006940,NM_152989 | SOX5:NM_001261415:exon2:c.C191T:p.T64M,SOX5:NM_006940:exon2:c.C221T:p.T74M,SOX5:NM_152989:exon5:c.C182T:p.T61M,SOX5:NM_001261414:exon6:c.C182T:p.T61M |
| 12 | 32134413  | G | A | KIAA1551 | NM_018169                                     | KIAA1551:NM_018169:exon4:c.G524A:p.R175Q                                                                                                              |
| 12 | 45270407  | G | C | NELL2    | NM_001145107                                  | NELL2:NM_001145107:exon1:c.C102G:p.H34Q                                                                                                               |
| 12 | 49391634  | C | T | DDN      | NM_015086                                     | DDN:NM_015086:exon2:c.G1025A:p.G342D                                                                                                                  |
| 12 | 49420078  | C | T | KMT2D    | NM_003482                                     | KMT2D:NM_003482:exon48:c.G15671A:p.R5224H                                                                                                             |
| 12 | 49743098  | G | A | DNAJC22  | NM_001304944,NM_024902                        | DNAJC22:NM_024902:exon2:c.G443A:p.R148H,DNAJC22:NM_001304944:exon3:c.G443A:p.R148H                                                                    |
| 12 | 51773409  | C | T | GALNT6   | NM_007210                                     | GALNT6:NM_007210:exon3:c.G157A:p.V53I                                                                                                                 |
| 12 | 52642506  | C | T | KRT7     | NM_005556                                     | KRT7:NM_005556:exon9:c.C1372T:p.R458W                                                                                                                 |
| 12 | 52822128  | G | A | KRT75    | NM_004693                                     | KRT75:NM_004693:exon7:c.C1294T:p.R432C                                                                                                                |
| 12 | 56213186  | A | G | ORMDL2   | NM_014182                                     | ORMDL2:NM_014182:exon3:c.A235G:p.K79E                                                                                                                 |

|    |           |   |   |          |                                                               |                                                                                                                                                      |
|----|-----------|---|---|----------|---------------------------------------------------------------|------------------------------------------------------------------------------------------------------------------------------------------------------|
| 12 | 56351128  | G | T | PMEL     | NM_001200053,NM_001200054,NM_006928                           | PMEL:NM_001200053:exon4:c.C701A:p.P234H,PMEL:NM_001200054:exon6:c.C959A:p.P320H,PMEL:NM_006928:exon7:c.C959A:p.P320H                                 |
| 12 | 56420706  | G | C | IKZF4    | NM_022465                                                     | IKZF4:NM_022465:exon4:c.G428C:p.G143A                                                                                                                |
| 12 | 56536651  | A | G | ESYT1    | NM_001184796,NM_015292                                        | ESYT1:NM_001184796:exon27:c.A2951G:p.Q984R,ESYT1:NM_015292:exon27:c.A2921G:p.Q974R                                                                   |
| 12 | 57351020  | C | A | RDH16    | NM_003708                                                     | RDH16:NM_003708:exon1:c.G227T:p.R76M                                                                                                                 |
| 12 | 57493541  | T | G | STAT6    | NM_001178078,NM_001178079,NM_001178080,NM_001178081,NM_003153 | .                                                                                                                                                    |
| 12 | 57919529  | C | G | MBD6     | NM_052897                                                     | MBD6:NM_052897:exon6:c.C778G:p.L260V                                                                                                                 |
| 12 | 58204606  | C | T | AVIL     | NM_006576                                                     | AVIL:NM_006576:exon5:c.G551A:p.R184H                                                                                                                 |
| 12 | 62861043  | G | A | MON2     | NM_001278469,NM_001278470,NM_001278471,NM_015026              | MON2:NM_001278469:exon1:c.G56A:p.S19N,MON2:NM_001278470:exon1:c.G56A:p.S19N,MON2:NM_001278471:exon1:c.G56A:p.S19N,MON2:NM_015026:exon1:c.G56A:p.S19N |
| 12 | 65564671  | C | G | LEMD3    | NM_001167614,NM_014319                                        | LEMD3:NM_001167614:exon1:c.C1295G:p.S432C,LEMD3:NM_014319:exon1:c.C1295G:p.S432C                                                                     |
| 12 | 78225384  | A | C | NAV3     | NM_001024383,NM_014903                                        | NAV3:NM_001024383:exon1:c.A143C:p.E48A,NAV3:NM_014903:exon1:c.A143C:p.E48A                                                                           |
| 12 | 81064181  | T | C | PTPRQ    | NM_001145026                                                  | PTPRQ:NM_001145026:exon39:c.T5996C:p.V1999A                                                                                                          |
| 12 | 102576340 | G | A | PARPBP   | NM_017915                                                     | PARPBP:NM_017915:exon9:c.G1198A:p.V400M                                                                                                              |
| 12 | 104391279 | A | G | GLT8D2   | NM_031302                                                     | GLT8D2:NM_031302:exon7:c.T437C:p.I146T                                                                                                               |
| 12 | 120593094 | G | A | GCN1L1   | NM_006836                                                     | GCN1L1:NM_006836:exon30:c.C3581T:p.A1194V                                                                                                            |
| 12 | 122995650 | A | C | RSRC2    | NM_023012                                                     | .                                                                                                                                                    |
| 12 | 123879668 | G | C | SETD8    | NM_020382                                                     | SETD8:NM_020382:exon4:c.G364C:p.G122R                                                                                                                |
| 12 | 125302144 | A | C | SCARB1   | NM_001082959,NM_005505                                        | SCARB1:NM_001082959:exon2:c.T236G:p.L79R,SCARB1:NM_005505:exon2:c.T236G:p.L79R                                                                       |
| 12 | 129190186 | C | A | TMEM132C | NM_001136103                                                  | TMEM132C:NM_001136103:exon9:c.C2673A:p.D891E                                                                                                         |
| 13 | 23910339  | G | A | SACS     | NM_001278055,NM_014363                                        | SACS:NM_001278055:exon8:c.C7235T:p.T2412I,SACS:NM_014363:exon10:c.C7676T:p.T2559I                                                                    |

|    |           |   |   |                 |                                                  |                                                                                                                                       |
|----|-----------|---|---|-----------------|--------------------------------------------------|---------------------------------------------------------------------------------------------------------------------------------------|
| 13 | 25478083  | T | C | CENPJ           | NM_018451                                        | CENPJ:NM_018451:exon8:c.A2806G:p.S936G                                                                                                |
| 13 | 25671292  | C | T | PABPC3          | NM_030979                                        | PABPC3:NM_030979:exon1:c.C956T:p.T319I                                                                                                |
| 13 | 25831336  | T | C | MTMR6           | NM_004685                                        | MTMR6:NM_004685:exon9:c.A1093G:p.M365V                                                                                                |
| 13 | 32821610  | A | G | FRY             | NM_023037                                        | FRY:NM_023037:exon48:c.A6979G:p.T2327A                                                                                                |
| 13 | 32972548  | C | T | BRCA2           | NM_000059                                        | BRCA2:NM_000059:exon27:c.C9898T:p.P3300S                                                                                              |
| 13 | 33016603  | G | A | N4BP2L2         | NM_001278432,NM_033111                           | N4BP2L2:NM_001278432:exon7:c.C2026T:p.R676C,N4BP2L2:NM_033111:exon7:c.C2071T:p.R691C                                                  |
| 13 | 48611934  | G | A | NUDT15          | NM_001304745,NM_018283                           | NUDT15:NM_001304745:exon1:c.G52A:p.V18I,NUDT15:NM_018283:exon1:c.G52A:p.V18I                                                          |
| 13 | 53624380  | A | C | OLFM4           | NM_006418                                        | OLFM4:NM_006418:exon5:c.A1007C:p.N336T                                                                                                |
| 13 | 67802256  | T | C | PCDH9           | NM_020403,NM_203487                              | PCDH9:NM_020403:exon2:c.A317G:p.E106G,PCDH9:NM_203487:exon2:c.A317G:p.E106G                                                           |
| 13 | 77759465  | T | C | MYCBP2          | NM_015057                                        | MYCBP2:NM_015057:exon32:c.A4492G:p.I1498V                                                                                             |
| 13 | 102235561 | C | T | ITGBL1          | NM_001271754,NM_001271755,NM_001271756,NM_004791 |                                                                                                                                       |
| 13 | 103389158 | A | T | CCDC168         | NM_001146197                                     | CCDC168:NM_001146197:exon4:c.T13889A:p.M4630K                                                                                         |
| 13 | 103473476 | C | T | BIVM-ERCC5,BIVM | NM_001159596,NM_001204425,NM_017693              | BIVM:NM_001159596:exon3:c.C8T:p.A3V,BIVM-ERCC5:NM_001204425:exon3:c.C695T:p.A232V,BIVM:NM_017693:exon5:c.C695T:p.A232V                |
| 13 | 115007743 | A | G | CDC16           | NM_001078645,NM_003903                           | CDC16:NM_001078645:exon6:c.A529G:p.T177A,CDC16:NM_003903:exon6:c.A529G:p.T177A                                                        |
| 14 | 20249176  | G | A | OR4M1           | NM_001005500                                     | OR4M1:NM_001005500:exon1:c.G695A:p.G232D                                                                                              |
| 14 | 21052230  | G | C | RNASE11         | NM_145250                                        | RNASE11:NM_145250:exon3:c.C404G:p.P135R                                                                                               |
| 14 | 21550028  | C | T | ARHGEF40        | NM_001278529,NM_001278530,NM_018071              | ARHGEF40:NM_001278529:exon14:c.C859T:p.R287W,ARHGEF40:NM_001278530:exon14:c.C859T:p.R287W,ARHGEF40:NM_018071:exon14:c.C3001T:p.R1001W |
| 14 | 23371408  | T | C | RBM23           | NM_001077351,NM_001077352,NM_018107              | RBM23:NM_001077352:exon9:c.A1012G:p.K338E,RBM23:NM_018107:exon10:c.A1066G:p.K356E,RBM23:NM_001077351:exon11:c.A1114G:p.K372E          |

|    |          |   |   |          |                                                                                                                                             |                                                                                                                                                                                                         |
|----|----------|---|---|----------|---------------------------------------------------------------------------------------------------------------------------------------------|---------------------------------------------------------------------------------------------------------------------------------------------------------------------------------------------------------|
| 14 | 23396746 | G | A | PRMT5    | NM_001039619,NM_001282953,NM_001282954,NM_001282955,NM_006109                                                                               | PRMT5:NM_001282953:exon3:c.C256T:p.H86Y,PRMT5:NM_001282954:exon3:c.C121T:p.H41Y,PRMT5:NM_001282955:exon3:c.C307T:p.H103Y,PRMT5:NM_001039619:exon4:c.C388T:p.H130Y,PRMT5:NM_006109:exon4:c.C439T:p.H147Y |
| 14 | 24769991 | A | T | NOP9     | NM_001286367,NM_174913                                                                                                                      | NOP9:NM_001286367:exon2:c.A625T:p.T209S,NOP9:NM_174913:exon2:c.A625T:p.T209S                                                                                                                            |
| 14 | 39901200 | C | T | FBXO33   | NM_203301                                                                                                                                   | FBXO33:NM_203301:exon1:c.G167A:p.R56Q                                                                                                                                                                   |
| 14 | 53525286 | A | T | DDHD1    | NM_001160147,NM_001160148,NM_030637                                                                                                         | DDHD1:NM_001160148:exon9:c.T1901A:p.I634N,DDHD1:NM_030637:exon9:c.T1901A:p.I634N,DDHD1:NM_001160147:exon10:c.T1922A:p.I641N                                                                             |
| 14 | 61180693 | T | A | SIX4     | NM_017420                                                                                                                                   | SIX4:NM_017420:exon3:c.A1778T:p.N593I                                                                                                                                                                   |
| 14 | 65260321 | C | T | SPTB     | NM_000347,NM_001024858                                                                                                                      | SPTB:NM_000347:exon13:c.G2060A:p.R687H,SPTB:NM_001024858:exon13:c.G2060A:p.R687H                                                                                                                        |
| 14 | 68192861 | T | A | RDH12    | NM_152443                                                                                                                                   | RDH12:NM_152443:exon6:c.T437A:p.V146D                                                                                                                                                                   |
| 14 | 69345796 | C | A | ACTN1    | NM_001102,NM_001130004                                                                                                                      | .                                                                                                                                                                                                       |
| 14 | 70925161 | A | G | ADAM21   | NM_003813                                                                                                                                   | ADAM21:NM_003813:exon2:c.A945G:p.I315M                                                                                                                                                                  |
| 14 | 73721320 | C | T | PAPLN    | NM_173462                                                                                                                                   | PAPLN:NM_173462:exon12:c.C1321T:p.R441W                                                                                                                                                                 |
| 14 | 74404653 | G | C | FAM161B  | NM_152445                                                                                                                                   | FAM161B:NM_152445:exon6:c.C1752G:p.N584K                                                                                                                                                                |
| 14 | 75538484 | T | A | ZC2HC1C  | NM_024643                                                                                                                                   | ZC2HC1C:NM_024643:exon2:c.T1208A:p.L403Q                                                                                                                                                                |
| 14 | 76525675 | G | A | IFT43    | NM_001102564                                                                                                                                | IFT43:NM_001102564:exon5:c.G254A:p.R85H                                                                                                                                                                 |
| 14 | 88406259 | A | G | GALC     | NM_000153,NM_001201401,NM_001201402                                                                                                         | GALC:NM_001201401:exon15:c.T1832C:p.L611S,GALC:NM_000153:exon16:c.T1901C:p.L634S,GALC:NM_001201402:exon16:c.T1823C:p.L608S                                                                              |
| 14 | 90778748 | C | T | NRDE2    | NM_017970                                                                                                                                   | NRDE2:NM_017970:exon4:c.G547A:p.D183N                                                                                                                                                                   |
| 14 | 93151482 | G | A | RIN3     | NM_024832                                                                                                                                   | RIN3:NM_024832:exon9:c.G2618A:p.R873H                                                                                                                                                                   |
| 14 | 94594946 | G | A | IFI27L2  | NM_032036                                                                                                                                   | IFI27L2:NM_032036:exon3:c.C104T:p.A35V                                                                                                                                                                  |
| 14 | 94848927 | A | G | SERPINA1 | NM_000295,NM_001002235,NM_001002236,NM_001127700,NM_001127701,NM_001127702,NM_001127703,NM_001127704,NM_001127705,NM_001127706,NM_001127707 | .                                                                                                                                                                                                       |



|    |           |   |   |          |                                     |                                                                                                                                  |
|----|-----------|---|---|----------|-------------------------------------|----------------------------------------------------------------------------------------------------------------------------------|
| 14 | 100331926 | G | A | EML1     | NM_001008707,NM_004434              | EML1:NM_001008707:exon3:c.G326A:p.G109D,EML1:NM_004434:exon3:c.G326A:p.G109D                                                     |
| 14 | 104208286 | G | T | PPP1R13B | NM_015316                           | PPP1R13B:NM_015316:exon11:c.C1663A:p.P555T                                                                                       |
| 14 | 104641674 | G | T | KIF26A   | NM_015656                           | KIF26A:NM_015656:exon12:c.G2549T:p.C850F                                                                                         |
| 14 | 105180903 | C | T | INF2     | NM_001031714,NM_022489              | INF2:NM_001031714:exon21:c.C3404T:p.T1135M,INF2:NM_022489:exon21:c.C3404T:p.T1135M                                               |
| 14 | 105350602 | C | T | CEP170B  | NM_001112726,NM_015005              | CEP170B:NM_015005:exon8:c.C1276T:p.R426C,CEP170B:NM_001112726:exon9:c.C1486T:p.R496C                                             |
| 14 | 105359870 | G | A | CEP170B  | NM_001112726,NM_015005              | CEP170B:NM_015005:exon14:c.G3944A:p.R1315H,CEP170B:NM_001112726:exon15:c.G4049A:p.R1350H                                         |
| 15 | 22368862  | G | A | OR4M2    | NM_001004719                        | OR4M2:NM_001004719:exon1:c.G287A:p.G96E                                                                                          |
| 15 | 22369426  | G | A | OR4M2    | NM_001004719                        | OR4M2:NM_001004719:exon1:c.G851A:p.R284H                                                                                         |
| 15 | 39874573  | C | T | THBS1    | NM_003246                           | THBS1:NM_003246:exon3:c.C247T:p.R83W                                                                                             |
| 15 | 40582849  | C | G | PLCB2    | NM_001284297,NM_001284298,NM_004573 | PLCB2:NM_001284298:exon28:c.G3093C:p.K1031N,PLCB2:NM_001284297:exon29:c.G3126C:p.K1042N,PLCB2:NM_004573:exon29:c.G3138C:p.K1046N |
| 15 | 40685797  | A | C | KNSTRN   | NM_033286                           | KNSTRN:NM_033286:exon9:c.A950C:p.X317S                                                                                           |
| 15 | 41797046  | C | T | LTK      | NM_001135685,NM_002344,NM_206961    | LTK:NM_001135685:exon15:c.G1655A:p.R552Q,LTK:NM_206961:exon16:c.G1862A:p.R621Q,LTK:NM_002344:exon17:c.G2045A:p.R682Q             |
| 15 | 43545052  | G | A | TGM5     | NM_004245,NM_201631                 | TGM5:NM_004245:exon5:c.C521T:p.T174M,TGM5:NM_201631:exon6:c.C767T:p.T256M                                                        |
| 15 | 43552621  | T | A | TGM5     | NM_004245,NM_201631                 | TGM5:NM_004245:exon2:c.A167T:p.N56I,TGM5:NM_201631:exon2:c.A167T:p.N56I                                                          |
| 15 | 43585143  | G | A | TGM7     | NM_052955                           | TGM7:NM_052955:exon3:c.C203T:p.P68L                                                                                              |
| 15 | 44107202  | C | A | MFAP1    | NM_005926                           | MFAP1:NM_005926:exon3:c.G370T:p.A124S                                                                                            |
| 15 | 48434456  | T | G | SLC24A5  | NM_205850                           | SLC24A5:NM_205850:exon9:c.T1411G:p.C471G                                                                                         |
| 15 | 48512873  | G | A | SLC12A1  | NM_000338,NM_001184832              | SLC12A1:NM_000338:exon3:c.G463A:p.G155S,SLC12A1:NM_001184832:exon3:c.G463A:p.G155S                                               |
| 15 | 51535155  | A | C | CYP19A1  | NM_000103,NM_031226                 | .                                                                                                                                |
| 15 | 63594621  | T | A | APH1B    | NM_001145646,NM_031301              | APH1B:NM_001145646:exon4:c.T433A:p.W145R,APH1B:NM_031301:exon                                                                    |

|    |          |   |   |        |                                                                   |                                                                                                                                                                                                                                        |
|----|----------|---|---|--------|-------------------------------------------------------------------|----------------------------------------------------------------------------------------------------------------------------------------------------------------------------------------------------------------------------------------|
|    |          |   |   |        |                                                                   | 5:c.T556A:p.W186R                                                                                                                                                                                                                      |
| 15 | 65425456 | G | A | PDCD7  | NM_005707                                                         | PDCD7:NM_005707:exon1:c.C664T:p.R222W                                                                                                                                                                                                  |
| 15 | 65490592 | C | T | CILP   | NM_003613                                                         | CILP:NM_003613:exon9:c.G2032A:p.V678M                                                                                                                                                                                                  |
| 15 | 66386799 | C | T | MEGF11 | NM_032445                                                         | MEGF11:NM_032445:exon5:c.G335A:p.C112Y                                                                                                                                                                                                 |
| 15 | 70959808 | A | G | UACA   | NM_001008224,NM_018003                                            | UACA:NM_001008224:exon16:c.T3176C:p.L1059S,UACA:NM_018003:exon16:c.T3215C:p.L1072S                                                                                                                                                     |
| 15 | 72283488 | G | A | MYO9A  | NM_006901                                                         | MYO9A:NM_006901:exon11:c.C1678T:p.R560C                                                                                                                                                                                                |
| 15 | 75646094 | G | A | NEIL1  | NM_001256552,NM_024608                                            | NEIL1:NM_001256552:exon6:c.G991A:p.G331R,NEIL1:NM_024608:exon6:c.G733A:p.G245R                                                                                                                                                         |
| 15 | 80450501 | G | T | FAH    | NM_000137                                                         | FAH:NM_000137:exon2:c.G181T:p.V61F                                                                                                                                                                                                     |
| 15 | 85401106 | G | A | ALPK3  | NM_020778                                                         | ALPK3:NM_020778:exon6:c.G3743A:p.R1248H                                                                                                                                                                                                |
| 15 | 89760506 | C | T | RLBP1  | NM_000326                                                         | RLBP1:NM_000326:exon5:c.G191A:p.R64Q                                                                                                                                                                                                   |
| 15 | 90630816 | G | A | IDH2   | NM_001289910,NM_001290114,NM_002168                               | .                                                                                                                                                                                                                                      |
| 15 | 91016096 | G | A | IQGAP1 | NM_003870                                                         | IQGAP1:NM_003870:exon19:c.G2203A:p.A735T                                                                                                                                                                                               |
| 15 | 94942206 | C | T | MCTP2  | NM_001159643,NM_001159644,NM_018349                               | MCTP2:NM_001159644:exon7:c.C569T:p.P190L,MCTP2:NM_001159643:exon14:c.C1805T:p.P602L,MCTP2:NM_018349:exon14:c.C1805T:p.P602L                                                                                                            |
| 15 | 98513207 | C | G | ARRDC4 | NM_183376                                                         | ARRDC4:NM_183376:exon6:c.C977G:p.S326C                                                                                                                                                                                                 |
| 15 | 99671011 | G | A | SYNM   | NM_015286,NM_145728                                               | UNKNOWN                                                                                                                                                                                                                                |
| 16 | 780592   | T | G | NARFL  | NM_001304799,NM_022493                                            | NARFL:NM_022493:exon11:c.A1256C:p.H419P,NARFL:NM_001304799:exon12:c.A950C:p.H317P                                                                                                                                                      |
| 16 | 837116   | C | G | RPUSD1 | NM_058192                                                         | RPUSD1:NM_058192:exon4:c.G370C:p.E124Q                                                                                                                                                                                                 |
| 16 | 2354110  | C | T | ABCA3  | NM_001089                                                         | ABCA3:NM_001089:exon12:c.G1327A:p.V443M                                                                                                                                                                                                |
| 16 | 7568208  | G | T | RBFOX1 | NM_001142333,NM_001142334,NM_018723,NM_145891,NM_145892,NM_145893 | RBFOX1:NM_145891:exon2:c.G147T:p.Q49H,RBFOX1:NM_145892:exon2:c.G147T:p.Q49H,RBFOX1:NM_145893:exon2:c.G147T:p.Q49H,RBFOX1:NM_001142334:exon3:c.G87T:p.Q29H,RBFOX1:NM_001142333:exon5:c.G87T:p.Q29H,RBFOX1:NM_018723:exon5:c.G87T:p.Q29H |
| 16 | 8895699  | A | T | PMM2   | NM_000303                                                         | PMM2:NM_000303:exon2:c.A110T:p.Q37L                                                                                                                                                                                                    |

|    |          |   |   |         |                                                                                      |                                                                                                                                                                                                                                                                                              |
|----|----------|---|---|---------|--------------------------------------------------------------------------------------|----------------------------------------------------------------------------------------------------------------------------------------------------------------------------------------------------------------------------------------------------------------------------------------------|
| 16 | 9858774  | A | G | GRIN2A  | NM_000833,NM_001134407,NM_001134408                                                  | GRIN2A:NM_001134407:exon13:c.T2627C:p.I876T,GRIN2A:NM_001134408:exon13:c.T2627C:p.I876T,GRIN2A:NM_000833:exon14:c.T2627C:p.I876T                                                                                                                                                             |
| 16 | 10273869 | T | C | GRIN2A  | NM_000833,NM_001134407,NM_001134408                                                  | GRIN2A:NM_001134407:exon2:c.A400G:p.I134V,GRIN2A:NM_001134408:exon2:c.A400G:p.I134V,GRIN2A:NM_000833:exon3:c.A400G:p.I134V                                                                                                                                                                   |
| 16 | 19884011 | C | T | GPRC5B  | NM_001304771,NM_016235                                                               | GPRC5B:NM_001304771:exon2:c.G550A:p.A184T,GPRC5B:NM_016235:exon2:c.G157A:p.A53T                                                                                                                                                                                                              |
| 16 | 24802206 | A | T | TNRC6A  | NM_014494                                                                            | TNRC6A:NM_014494:exon6:c.A2243T:p.N748I                                                                                                                                                                                                                                                      |
| 16 | 29706207 | C | T | QPRT    | NM_014298                                                                            | QPRT:NM_014298:exon2:c.C236T:p.S79L                                                                                                                                                                                                                                                          |
| 16 | 31448170 | T | C | ZNF843  | NM_001136509                                                                         | ZNF843:NM_001136509:exon2:c.A1G:p.M1V                                                                                                                                                                                                                                                        |
| 16 | 31471240 | C | A | ARMC5   | NM_001105247,NM_001288767,NM_001301820,NM_024742                                     | ARMC5:NM_001105247:exon1:c.C395A:p.A132E,ARMC5:NM_024742:exon1:c.C395A:p.A132E,ARMC5:NM_001301820:exon2:c.C491A:p.A164E,ARMC5:NM_001288767:exon3:c.C680A:p.A227E                                                                                                                             |
| 16 | 50187728 | A | C | PAPD5   | NM_001040284,NM_001040285                                                            | PAPD5:NM_001040284:exon2:c.A151C:p.T51P,PAPD5:NM_001040285:exon2:c.A151C:p.T51P                                                                                                                                                                                                              |
| 16 | 51171333 | G | A | SALL1   | NM_001127892,NM_002968                                                               | SALL1:NM_001127892:exon3:c.C3374T:p.A1125V,SALL1:NM_002968:exon3:c.C3665T:p.A1222V                                                                                                                                                                                                           |
| 16 | 55361526 | G | A | IRX6    | NM_024335                                                                            | IRX6:NM_024335:exon4:c.G442A:p.G148S                                                                                                                                                                                                                                                         |
| 16 | 56904040 | G | A | SLC12A3 | NM_000339,NM_001126107,NM_001126108                                                  | SLC12A3:NM_000339:exon5:c.G634A:p.G212S,SLC12A3:NM_001126107:exon5:c.G631A:p.G211S,SLC12A3:NM_001126108:exon5:c.G634A:p.G212S                                                                                                                                                                |
| 16 | 58541762 | C | T | NDRG4   | NM_001130487,NM_001242833,NM_001242834,NM_001242835,NM_001242836,NM_020465,NM_022910 | NDRG4:NM_001242834:exon9:c.C725T:p.T242M,NDRG4:NM_001242835:exon9:c.C671T:p.T224M,NDRG4:NM_001242836:exon9:c.C671T:p.T224M,NDRG4:NM_001242833:exon10:c.C761T:p.T254M,NDRG4:NM_001130487:exon11:c.C827T:p.T276M,NDRG4:NM_020465:exon11:c.C767T:p.T256M,NDRG4:NM_022910:exon11:c.C767T:p.T256M |
| 16 | 66430060 | C | T | CDH5    | NM_001795                                                                            | CDH5:NM_001795:exon8:c.C1316T:p.P439L                                                                                                                                                                                                                                                        |
| 16 | 70164334 | A | G | PDPR    | NM_017990                                                                            | PDPR:NM_017990:exon7:c.A616G:p.I206V                                                                                                                                                                                                                                                         |
| 16 | 70432148 | C | T | ST3GAL2 | NM_006927                                                                            | ST3GAL2:NM_006927:exon2:c.G286A:p.V96I                                                                                                                                                                                                                                                       |
| 16 | 70884524 | C | G | HYDIN   | NM_001270974                                                                         | HYDIN:NM_001270974:exon74:c.G12478C:p.E4160Q                                                                                                                                                                                                                                                 |
| 16 | 70894087 | T | C | HYDIN   | NM_001270974                                                                         | HYDIN:NM_001270974:exon71:c.A12013G:p.T4005A                                                                                                                                                                                                                                                 |
| 16 | 70902559 | C | T | HYDIN   | NM_001270974                                                                         | HYDIN:NM_001270974:exon66:c.G11224A:p.V3742I                                                                                                                                                                                                                                                 |

|    |          |   |   |         |                                                  |                                                                                                                                                                          |
|----|----------|---|---|---------|--------------------------------------------------|--------------------------------------------------------------------------------------------------------------------------------------------------------------------------|
| 16 | 70902568 | C | T | HYDIN   | NM_001270974                                     | HYDIN:NM_001270974:exon66:c.G11215A:p.A3739T                                                                                                                             |
| 16 | 70954606 | C | T | HYDIN   | NM_001270974                                     | HYDIN:NM_001270974:exon46:c.G7673A:p.G2558E                                                                                                                              |
| 16 | 70972620 | G | C | HYDIN   | NM_001270974                                     | HYDIN:NM_001270974:exon44:c.C6892G:p.R2298G                                                                                                                              |
| 16 | 70989335 | G | A | HYDIN   | NM_001270974                                     | HYDIN:NM_001270974:exon40:c.C6259T:p.R2087C                                                                                                                              |
| 16 | 71007809 | C | T | HYDIN   | NM_001270974                                     | HYDIN:NM_001270974:exon34:c.G5152A:p.V1718M                                                                                                                              |
| 16 | 71098649 | T | C | HYDIN   | NM_001198542,NM_001198543,NM_001270974,NM_017558 | HYDIN:NM_001198542:exon16:c.A2251G:p.N751D,HYDIN:NM_001198543:exon16:c.A2221G:p.N741D,HYDIN:NM_001270974:exon16:c.A2170G:p.N724D,HYDIN:NM_017558:exon16:c.A2170G:p.N724D |
| 16 | 71101200 | T | C | HYDIN   | NM_001198542,NM_001198543,NM_001270974,NM_017558 | HYDIN:NM_001198542:exon15:c.A2149G:p.T717A,HYDIN:NM_001198543:exon15:c.A2119G:p.T707A,HYDIN:NM_001270974:exon15:c.A2068G:p.T690A,HYDIN:NM_017558:exon15:c.A2068G:p.T690A |
| 16 | 71122408 | C | T | HYDIN   | NM_001198542,NM_001198543,NM_001270974,NM_017558 | HYDIN:NM_001198542:exon12:c.G1547A:p.G516D,HYDIN:NM_001198543:exon12:c.G1517A:p.G506D,HYDIN:NM_001270974:exon12:c.G1466A:p.G489D,HYDIN:NM_017558:exon12:c.G1466A:p.G489D |
| 16 | 71127814 | C | G | HYDIN   | NM_001198542,NM_001198543,NM_001270974,NM_017558 | HYDIN:NM_001198542:exon11:c.G1433C:p.R478P,HYDIN:NM_001198543:exon11:c.G1403C:p.R468P,HYDIN:NM_001270974:exon11:c.G1352C:p.R451P,HYDIN:NM_017558:exon11:c.G1352C:p.R451P |
| 16 | 72184631 | A | C | PMFBP1  | NM_001160213,NM_031293                           | PMFBP1:NM_031293:exon5:c.T512G:p.I171S,PMFBP1:NM_001160213:exon6:c.T77G:p.I26S                                                                                           |
| 16 | 72984669 | G | A | ZFH3    | NM_001164766,NM_006885                           | ZFH3:NM_001164766:exon2:c.C173T:p.S58L,ZFH3:NM_006885:exon3:c.C2915T:p.S972L                                                                                             |
| 16 | 77822740 | A | G | VAT1L   | NM_020927                                        | VAT1L:NM_020927:exon1:c.A161G:p.N54S                                                                                                                                     |
| 16 | 81030993 | G | A | CMC2    | NM_020188                                        | CMC2:NM_020188:exon2:c.C7T:p.P3S                                                                                                                                         |
| 16 | 81324057 | G | A | BCO1    | NM_017429                                        | BCO1:NM_017429:exon11:c.G1519A:p.V507I                                                                                                                                   |
| 16 | 84444206 | C | G | ATP2C2  | NM_001286527,NM_001291454,NM_014861              | ATP2C2:NM_001291454:exon3:c.C59G:p.S20C,ATP2C2:NM_001286527:exon5:c.C450G:p.I150M,ATP2C2:NM_014861:exon5:c.C450G:p.I150M                                                 |
| 16 | 89347285 | T | C | ANKRD11 | NM_001256182,NM_001256183,NM_013275              | ANKRD11:NM_001256183:exon9:c.A5665G:p.K1889E,ANKRD11:NM_013275:exon9:c.A5665G:p.K1889E,ANKRD11:NM_001256182:exon10:c.A5665G:p.K1889E                                     |
| 16 | 89986025 | T | C | MC1R    | NM_002386                                        | MC1R:NM_002386:exon1:c.T359C:p.I120T                                                                                                                                     |

|    |          |   |   |               |                                     |                                                                                                                               |
|----|----------|---|---|---------------|-------------------------------------|-------------------------------------------------------------------------------------------------------------------------------|
| 17 | 3533618  | C | G | SHPK          | NM_013276                           | SHPK:NM_013276:exon2:c.G191C:p.R64T                                                                                           |
| 17 | 4389545  | G | A | SPNS3         | NM_182538                           | SPNS3:NM_182538:exon10:c.G1202A:p.R401Q                                                                                       |
| 17 | 4586159  | C | T | PELP1         | NM_001278241,NM_014389              | PELP1:NM_014389:exon4:c.G659A:p.R220Q,PELP1:NM_001278241:exon5:c.G68A:p.R23Q                                                  |
| 17 | 6704182  | C | A | TEKT1         | NM_053285                           | TEKT1:NM_053285:exon7:c.G933T:p.K311N                                                                                         |
| 17 | 7847814  | G | A | CNTROB        | NM_001037144,NM_053051              | CNTROB:NM_001037144:exon12:c.G1592A:p.R531Q,CNTROB:NM_053051:exon12:c.G1592A:p.R531Q                                          |
| 17 | 7948638  | C | T | ALOX15B       | NM_001039130,NM_001039131,NM_001141 | ALOX15B:NM_001039130:exon7:c.C932T:p.A311V,ALOX15B:NM_001039131:exon7:c.C932T:p.A311V,ALOX15B:NM_001141:exon7:c.C932T:p.A311V |
| 17 | 7979610  | G | A | ALOX12B       | NM_001139                           | ALOX12B:NM_001139:exon11:c.C1415T:p.S472L                                                                                     |
| 17 | 8172434  | G | A | PFAS          | NM_012393                           | PFAS:NM_012393:exon28:c.G3869A:p.R1290H                                                                                       |
| 17 | 8647006  | C | T | CCDC42        | NM_001158261,NM_144681              | CCDC42:NM_001158261:exon3:c.G232A:p.E78K,CCDC42:NM_144681:exon3:c.G232A:p.E78K                                                |
| 17 | 10405194 | C | T | MYH1          | NM_005963                           | MYH1:NM_005963:exon25:c.G3146A:p.R1049Q                                                                                       |
| 17 | 15971325 | C | T | NCOR1         | NM_001190440,NM_006311              | NCOR1:NM_001190440:exon31:c.G4672A:p.V1558M,NCOR1:NM_006311:exon32:c.G4624A:p.V1542M                                          |
| 17 | 21318698 | C | T | KCNJ12,KCNJ18 | NM_001194958,NM_021012              | KCNJ18:NM_001194958:exon3:c.C44T:p.S15L,KCNJ12:NM_021012:exon3:c.C44T:p.S15L                                                  |
| 17 | 21319121 | C | T | KCNJ12,KCNJ18 | NM_001194958,NM_021012              | KCNJ18:NM_001194958:exon3:c.C467T:p.P156L,KCNJ12:NM_021012:exon3:c.C467T:p.P156L                                              |
| 17 | 21319230 | G | C | KCNJ12,KCNJ18 | NM_001194958,NM_021012              | KCNJ18:NM_001194958:exon3:c.G576C:p.Q192H,KCNJ12:NM_021012:exon3:c.G576C:p.Q192H                                              |
| 17 | 21319943 | A | G | KCNJ12,KCNJ18 | NM_001194958,NM_021012              | KCNJ18:NM_001194958:exon3:c.A1289G:p.E430G,KCNJ12:NM_021012:exon3:c.A1289G:p.E430G                                            |
| 17 | 26699260 | C | G | SARM1         | NM_015077                           | SARM1:NM_015077:exon2:c.C206G:p.A69G                                                                                          |
| 17 | 26861773 | C | T | FOXN1         | NM_003593                           | FOXN1:NM_003593:exon7:c.C1184T:p.P395L                                                                                        |
| 17 | 26861884 | C | A | FOXN1         | NM_003593                           | FOXN1:NM_003593:exon7:c.C1295A:p.P432H                                                                                        |
| 17 | 33319683 | C | T | LIG3          | NM_002311,NM_013975                 | LIG3:NM_002311:exon8:c.C1427T:p.S476L,LIG3:NM_013975:exon8:c.C1427T:p.S476L                                                   |

|    |          |   |   |          |                                                   |                                                                                                                                                                                                         |
|----|----------|---|---|----------|---------------------------------------------------|---------------------------------------------------------------------------------------------------------------------------------------------------------------------------------------------------------|
| 17 | 33456472 | C | T | FNDC8    | NM_017559                                         | FNDC8:NM_017559:exon3:c.C617T:p.P206L                                                                                                                                                                   |
| 17 | 33767871 | C | T | SLFN13   | NM_144682                                         | SLFN13:NM_144682:exon6:c.G2437A:p.V813I                                                                                                                                                                 |
| 17 | 35600469 | C | G | ACACA    | NM_198834,NM_198836,NM_198837,NM_198838,NM_198839 | ACACA:NM_198837:exon20:c.G2464C:p.D822H,ACACA:NM_198838:exon21:c.G2404C:p.D802H,ACACA:NM_198834:exon22:c.G2749C:p.D917H,ACACA:NM_198836:exon22:c.G2638C:p.D880H,ACACA:NM_198839:exon26:c.G2638C:p.D880H |
| 17 | 37101367 | T | A | FBXO47   | NM_001008777                                      | FBXO47:NM_001008777:exon7:c.A639T:p.L213F                                                                                                                                                               |
| 17 | 37817129 | G | A | STARD3   | NM_001165937,NM_001165938,NM_006804               | STARD3:NM_001165938:exon11:c.G967A:p.V323M,STARD3:NM_001165937:exon12:c.G1021A:p.V341M,STARD3:NM_006804:exon12:c.G1021A:p.V341M                                                                         |
| 17 | 39724592 | A | G | KRT9     | NM_000226                                         | KRT9:NM_000226:exon6:c.T1216C:p.C406R                                                                                                                                                                   |
| 17 | 40256845 | G | A | DHX58    | NM_024119                                         | DHX58:NM_024119:exon11:c.C1502T:p.T501M                                                                                                                                                                 |
| 17 | 40714900 | T | A | COASY    | NM_001042529,NM_001042532,NM_025233               | COASY:NM_025233:exon1:c.T260A:p.L87Q,COASY:NM_001042529:exon2:c.T260A:p.L87Q,COASY:NM_001042532:exon3:c.T347A:p.L116Q                                                                                   |
| 17 | 45266522 | T | C | CDC27    | NM_001114091,NM_001256,NM_001293089               | CDC27:NM_001114091:exon1:c.A17G:p.E6G,CDC27:NM_001256:exon1:c.A17G:p.E6G,CDC27:NM_001293089:exon1:c.A17G:p.E6G                                                                                          |
| 17 | 45266535 | T | C | CDC27    | NM_001114091,NM_001256,NM_001293089               | CDC27:NM_001114091:exon1:c.A4G:p.T2A,CDC27:NM_001256:exon1:c.A4G:p.T2A,CDC27:NM_001293089:exon1:c.A4G:p.T2A                                                                                             |
| 17 | 45925777 | C | G | SP6      | NM_001258248,NM_199262                            | SP6:NM_001258248:exon2:c.G19C:p.G7R,SP6:NM_199262:exon2:c.G19C:p.G7R                                                                                                                                    |
| 17 | 46052944 | T | C | CDK5RAP3 | NM_001278197,NM_001278217,NM_176096               | CDK5RAP3:NM_001278217:exon6:c.T317C:p.I106T,CDK5RAP3:NM_001278197:exon7:c.T653C:p.I218T,CDK5RAP3:NM_176096:exon7:c.T578C:p.I193T                                                                        |
| 17 | 46627980 | C | T | HOXB3    | NM_002146                                         | HOXB3:NM_002146:exon4:c.G1012A:p.G338R                                                                                                                                                                  |
| 17 | 48184448 | G | A | PDK2     | NM_001199898,NM_001199899,NM_002611               | PDK2:NM_001199899:exon6:c.G424A:p.D142N,PDK2:NM_002611:exon6:c.G616A:p.D206N,PDK2:NM_001199898:exon7:c.G424A:p.D142N                                                                                    |
| 17 | 56620317 | T | C | C17orf47 | NM_001038704                                      | C17orf47:NM_001038704:exon1:c.A1231G:p.R411G                                                                                                                                                            |
| 17 | 61780961 | A | C | STRADA   | NM_001003786,NM_001003787,NM_001003788            | STRADA:NM_001003786:exon11:c.T1183G:p.X395G,STRADA:NM_001003788:exon12:c.T1120G:p.X374G,STRADA:NM_001003787:exon13:c.T1294G:p.X432G                                                                     |

|    |          |   |   |            |                                        |                                                                                                                                   |
|----|----------|---|---|------------|----------------------------------------|-----------------------------------------------------------------------------------------------------------------------------------|
| 17 | 71357828 | C | T | SDK2       | NM_001144952                           | SDK2:NM_001144952:exon39:c.G5462A:p.G1821E                                                                                        |
| 17 | 73759113 | G | A | GALK1      | NM_000154                              | GALK1:NM_000154:exon4:c.C593T:p.A198V                                                                                             |
| 17 | 74154550 | T | C | RNF157     | NM_052916                              | RNF157:NM_052916:exon13:c.A1337G:p.E446G                                                                                          |
| 17 | 76455168 | G | A | DNAH17     | NM_173628                              | DNAH17:NM_173628:exon61:c.C9776T:p.A3259V                                                                                         |
| 17 | 76795028 | C | T | USP36      | NM_025090                              | USP36:NM_025090:exon19:c.G3202A:p.V1068M                                                                                          |
| 17 | 76887763 | G | A | KIAA1731NL | NM_001243540,NM_001243541              | KIAA1731NL:NM_001243540:exon3:c.C823T:p.R275W,KIAA1731NL:NM_001243541:exon3:c.C649T:p.R217W                                       |
| 17 | 77914756 | G | A | TBC1D16    | NM_001271844,NM_001271845,NM_019020    | TBC1D16:NM_001271844:exon8:c.C1081T:p.P361S,TBC1D16:NM_001271845:exon8:c.C1120T:p.P374S,TBC1D16:NM_019020:exon12:c.C2206T:p.P736S |
| 17 | 78395694 | C | T | ENDOV      | NM_173627                              | ENDOV:NM_173627:exon3:c.C295T:p.R99X                                                                                              |
| 17 | 79826370 | C | T | ARHGDI1    | NM_001301240,NM_001301241,NM_001301242 | ARHGDI1:NM_001301240:exon7:c.G593A:p.R198H,ARHGDI1:NM_001301241:exon7:c.G593A:p.R198H                                             |
| 17 | 80863817 | C | T | TBCD       | NM_005993                              | TBCD:NM_005993:exon20:c.C1810T:p.P604S                                                                                            |
| 18 | 7013921  | C | T | LAMA1      | NM_005559                              | LAMA1:NM_005559:exon23:c.G3256A:p.D1086N                                                                                          |
| 18 | 7080418  | G | A | LAMA1      | NM_005559                              | LAMA1:NM_005559:exon2:c.C100T:p.H34Y                                                                                              |
| 18 | 14542931 | C | T | POTEC      | NM_001137671                           | POTEC:NM_001137671:exon1:c.G215A:p.C72Y                                                                                           |
| 18 | 21761123 | C | T | OSBPL1A    | NM_001242508,NM_018030,NM_080597       | OSBPL1A:NM_018030:exon5:c.G259A:p.V87M,OSBPL1A:NM_001242508:exon7:c.G652A:p.V218M,OSBPL1A:NM_080597:exon19:c.G1798A:p.V600M       |
| 18 | 39537579 | T | G | PIK3C3     | NM_002647                              | PIK3C3:NM_002647:exon2:c.T113G:p.V38G                                                                                             |
| 18 | 44122704 | C | T | LOXHD1     | NM_001145472,NM_144612                 | LOXHD1:NM_001145472:exon6:c.G401A:p.G134D,LOXHD1:NM_144612:exon24:c.G3734A:p.G1245D                                               |
| 19 | 1046353  | C | T | ABCA7      | NM_019112                              | ABCA7:NM_019112:exon13:c.C1570T:p.R524W                                                                                           |
| 19 | 1495526  | G | C | REEP6      | NM_138393                              | REEP6:NM_138393:exon3:c.G268C:p.V90L                                                                                              |
| 19 | 8176044  | C | T | FBN3       | NM_032447                              | FBN3:NM_032447:exon32:c.G4108A:p.V1370M                                                                                           |
| 19 | 9057936  | G | A | MUC16      | NM_024690                              | MUC16:NM_024690:exon3:c.C29510T:p.T9837I                                                                                          |
| 19 | 9721564  | C | T | ZNF561     | NM_152289                              | ZNF561:NM_152289:exon6:c.G773A:p.C258Y                                                                                            |
| 19 | 10469919 | G | A | TYK2       | NM_003331                              | TYK2:NM_003331:exon15:c.C2107T:p.R703W                                                                                            |

|    |          |   |   |         |                                  |                                                                                                                           |
|----|----------|---|---|---------|----------------------------------|---------------------------------------------------------------------------------------------------------------------------|
| 19 | 10472988 | C | T | TYK2    | NM_003331                        | TYK2:NM_003331:exon11:c.G1621A:p.G541R                                                                                    |
| 19 | 12186411 | A | G | ZNF844  | NM_001136501                     | ZNF844:NM_001136501:exon4:c.A476G:p.Q159R                                                                                 |
| 19 | 12759074 | G | C | MAN2B1  | NM_000528,NM_001173498           | MAN2B1:NM_000528:exon21:c.C2579G:p.A860G,MAN2B1:NM_001173498:exon21:c.C2576G:p.A859G                                      |
| 19 | 14512363 | C | A | CD97    | NM_001025160,NM_001784,NM_078481 | ADGRE5:NM_001784:exon8:c.C784A:p.P262T,ADGRE5:NM_001025160:exon9:c.C916A:p.P306T,ADGRE5:NM_078481:exon10:c.C1063A:p.P355T |
| 19 | 14561754 | G | T | PKN1    | NM_002741,NM_213560              | PKN1:NM_002741:exon6:c.G803T:p.R268L,PKN1:NM_213560:exon6:c.G821T:p.R274L                                                 |
| 19 | 15734882 | C | G | CYP4F8  | NM_007253                        | UNKNOWN                                                                                                                   |
| 19 | 15806834 | T | C | CYP4F12 | NM_023944                        | CYP4F12:NM_023944:exon10:c.T1204C:p.C402R                                                                                 |
| 19 | 15918009 | G | A | OR10H1  | NM_013940                        | OR10H1:NM_013940:exon1:c.C839T:p.T280M                                                                                    |
| 19 | 16275664 | G | A | CIB3    | NM_001300922,NM_054113           | CIB3:NM_001300922:exon3:c.C260T:p.T87M,CIB3:NM_054113:exon5:c.C407T:p.T136M                                               |
| 19 | 17306242 | G | A | MYO9B   | NM_001130065,NM_004145           | MYO9B:NM_001130065:exon22:c.G4006A:p.D1336N,MYO9B:NM_004145:exon22:c.G4006A:p.D1336N                                      |
| 19 | 19643535 | G | A | YJEFN3  | NM_001190328,NM_198537           | YJEFN3:NM_001190328:exon2:c.G154A:p.V52M,YJEFN3:NM_198537:exon3:c.G304A:p.V102M                                           |
| 19 | 33703847 | T | C | SLC7A10 | NM_019849                        | SLC7A10:NM_019849:exon3:c.A418G:p.M140V                                                                                   |
| 19 | 36211118 | G | A | KMT2B   | NM_014727                        | KMT2B:NM_014727:exon3:c.G869A:p.R290H                                                                                     |
| 19 | 36212009 | C | G | KMT2B   | NM_014727                        | KMT2B:NM_014727:exon3:c.C1760G:p.P587R                                                                                    |
| 19 | 36236773 | G | A | PSENE1  | NM_001281532                     | .                                                                                                                         |
| 19 | 36357242 | G | T | KIRREL2 | NM_199180                        | KIRREL2:NM_199180:exon15:c.G1975T:p.A659S                                                                                 |
| 19 | 36674347 | T | C | ZNF565  | NM_001042474,NM_152477           | ZNF565:NM_001042474:exon5:c.A521G:p.K174R,ZNF565:NM_152477:exon5:c.A521G:p.K174R                                          |
| 19 | 37726476 | C | T | ZNF383  | NM_152604                        | ZNF383:NM_152604:exon3:c.C35T:p.S12F                                                                                      |
| 19 | 38377773 | G | A | WDR87   | NM_001291088,NM_031951           | WDR87:NM_001291088:exon6:c.C6538T:p.R2180W,WDR87:NM_031951:exon6:c.C6421T:p.R2141W                                        |
| 19 | 38877754 | A | G | GGN     | NM_152657                        | GGN:NM_152657:exon3:c.T148C:p.W50R                                                                                        |
| 19 | 39390785 | C | T | NFKB1B  | NM_002503                        | NFKB1B:NM_002503:exon1:c.C113T:p.A38V                                                                                     |



|    |          |   |   |               |                                                               |                                                                                                                                                                                                 |
|----|----------|---|---|---------------|---------------------------------------------------------------|-------------------------------------------------------------------------------------------------------------------------------------------------------------------------------------------------|
| 19 | 39787237 | G | T | IFNL1         | NM_172140                                                     | .                                                                                                                                                                                               |
| 19 | 45153329 | G | A | PVR           | NM_001135768,NM_001135769,NM_001135770,NM_006505              | PVR:NM_001135768:exon3:c.G676A:p.E226K,PVR:NM_001135769:exon3:c.G676A:p.E226K,PVR:NM_001135770:exon3:c.G676A:p.E226K,PVR:NM_006505:exon3:c.G676A:p.E226K                                        |
| 19 | 45411122 | G | A | APOE          | NM_000041,NM_001302688,NM_001302689,NM_001302690,NM_001302691 | APOE:NM_000041:exon3:c.G149A:p.R50H,APOE:NM_001302688:exon3:c.G227A:p.R76H,APOE:NM_001302689:exon3:c.G149A:p.R50H,APOE:NM_001302690:exon3:c.G149A:p.R50H,APOE:NM_001302691:exon3:c.G149A:p.R50H |
| 19 | 45445586 | G | A | APOC4         | NM_001646                                                     | APOC4:NM_001646:exon1:c.G52A:p.V18M                                                                                                                                                             |
| 19 | 45648738 | C | A | PPP1R37       | NM_019121                                                     | PPP1R37:NM_019121:exon11:c.C1424A:p.P475H                                                                                                                                                       |
| 19 | 47909743 | A | C | MEIS3         | NM_001009813,NM_001301059,NM_020160                           | MEIS3:NM_001009813:exon12:c.T1068G:p.H356Q,MEIS3:NM_001301059:exon12:c.T1119G:p.H373Q,MEIS3:NM_020160:exon12:c.T1257G:p.H419Q                                                                   |
| 19 | 49965959 | G | A | ALDH16A1      | NM_001145396,NM_153329                                        | ALDH16A1:NM_001145396:exon7:c.G892A:p.A298T,ALDH16A1:NM_153329:exon8:c.G1045A:p.A349T                                                                                                           |
| 19 | 50796922 | G | A | MYH14         | NM_001077186,NM_001145809,NM_024729                           | MYH14:NM_024729:exon37:c.G5324A:p.R1775H,MYH14:NM_001077186:exon38:c.G5348A:p.R1783H,MYH14:NM_001145809:exon39:c.G5447A:p.R1816H                                                                |
| 19 | 52090498 | A | C | ZNF175        | NM_007147                                                     | ZNF175:NM_007147:exon5:c.A914C:p.N305T                                                                                                                                                          |
| 19 | 54744387 | C | T | LILRA6,LILRB3 | NM_001081450,NM_006864,NM_024318                              | LILRB3:NM_001081450:exon6:c.G1021A:p.V341M,LILRB3:NM_006864:exon6:c.G1021A:p.V341M,LILRA6:NM_024318:exon6:c.G1012A:p.V338M                                                                      |
| 19 | 55718153 | C | T | PTPRH         | NM_001161440,NM_002842                                        | PTPRH:NM_001161440:exon3:c.G256A:p.V86M,PTPRH:NM_002842:exon3:c.G256A:p.V86M                                                                                                                    |
| 19 | 57956321 | A | T | ZNF749        | NM_001023561                                                  | ZNF749:NM_001023561:exon3:c.A1805T:p.H602L                                                                                                                                                      |
| 19 | 58058561 | C | G | ZNF550        | NM_001277090,NM_001277091,NM_001277092                        | ZNF550:NM_001277090:exon4:c.G1051C:p.A351P,ZNF550:NM_001277091:exon4:c.G1051C:p.A351P,ZNF550:NM_001277092:exon4:c.G1051C:p.A351P                                                                |
| 19 | 58806424 | G | A | ZNF8          | NM_021089                                                     | ZNF8:NM_021089:exon4:c.G1250A:p.R417Q                                                                                                                                                           |
| 19 | 58967729 | G | A | ZNF324B       | NM_207395                                                     | ZNF324B:NM_207395:exon4:c.G1418A:p.R473H                                                                                                                                                        |
| 20 | 1286411  | G | A | SNPH          | NM_014723                                                     | SNPH:NM_014723:exon6:c.G1198A:p.V400M                                                                                                                                                           |
| 20 | 3102309  | C | T | UBOX5         | NM_001267584,NM_014948,NM_199415                              | UBOX5:NM_001267584:exon3:c.G976A:p.A326T,UBOX5:NM_014948:exon3:c.G976A:p.A326T,UBOX5:NM_199415:exon3:c.G976A:p.A326T                                                                            |

|    |          |   |   |          |                                               |                                                                                                                                                                          |
|----|----------|---|---|----------|-----------------------------------------------|--------------------------------------------------------------------------------------------------------------------------------------------------------------------------|
| 20 | 23401963 | G | A | NAPB     | NM_001283018,NM_001283020,NM_022080           | NAPB:NM_001283018:exon1:c.C77T:p.S26F,NAPB:NM_001283020:exon1:c.C77T:p.S26F,NAPB:NM_022080:exon1:c.C77T:p.S26F                                                           |
| 20 | 23401975 | T | C | NAPB     | NM_001283018,NM_001283020,NM_022080           | NAPB:NM_001283018:exon1:c.A65G:p.K22R,NAPB:NM_001283020:exon1:c.A65G:p.K22R,NAPB:NM_022080:exon1:c.A65G:p.K22R                                                           |
| 20 | 29993891 | T | C | DEFB121  | NM_001011878                                  | .                                                                                                                                                                        |
| 20 | 30512851 | C | G | TTLL9    | NM_001008409                                  | TTLL9:NM_001008409:exon9:c.C704G:p.S235W                                                                                                                                 |
| 20 | 31680288 | G | A | BPIFB4   | NM_182519                                     | BPIFB4:NM_182519:exon9:c.G1168A:p.G390R                                                                                                                                  |
| 20 | 31814763 | G | T | BPIFA3   | NM_001042439,NM_178466                        | BPIFA3:NM_001042439:exon5:c.G541T:p.G181W,BPIFA3:NM_178466:exon6:c.G649T:p.G217W                                                                                         |
| 20 | 33584309 | A | G | MYH7B    | NM_020884                                     | MYH7B:NM_020884:exon29:c.A3230G:p.E1077G                                                                                                                                 |
| 20 | 33591013 | G | C | TRPC4AP  | NM_015638,NM_199368                           | TRPC4AP:NM_015638:exon19:c.C2330G:p.S777C,TRPC4AP:NM_199368:exon19:c.C2306G:p.S769C                                                                                      |
| 20 | 36850938 | C | T | KIAA1755 | NM_001029864                                  | KIAA1755:NM_001029864:exon10:c.G2330A:p.G777D                                                                                                                            |
| 20 | 39991664 | C | T | EMILIN3  | NM_052846                                     | EMILIN3:NM_052846:exon4:c.G545A:p.R182Q                                                                                                                                  |
| 20 | 42939673 | T | C | FITM2    | NM_001080472                                  | FITM2:NM_001080472:exon1:c.A116G:p.K39R                                                                                                                                  |
| 20 | 44432001 | G | A | DNTTIP1  | NM_052951                                     | DNTTIP1:NM_052951:exon8:c.G587A:p.R196H                                                                                                                                  |
| 20 | 44477103 | A | C | ACOT8    | NM_005469                                     | ACOT8:NM_005469:exon3:c.T474G:p.I158M                                                                                                                                    |
| 20 | 47990709 | A | G | KCNB1    | NM_004975                                     | KCNB1:NM_004975:exon2:c.T1388C:p.I463T                                                                                                                                   |
| 20 | 52779338 | C | G | CYP24A1  | NM_000782,NM_001128915                        | CYP24A1:NM_000782:exon7:c.G908C:p.C303S,CYP24A1:NM_001128915:exon7:c.G908C:p.C303S                                                                                       |
| 20 | 57268940 | C | T | NPEPL1   | NM_001204872,NM_001204873,NM_024663           | NPEPL1:NM_024663:exon2:c.C298T:p.R100W,NPEPL1:NM_001204872:exon3:c.C214T:p.R72W,NPEPL1:NM_001204873:exon3:c.C154T:p.R52W                                                 |
| 20 | 61287999 | G | A | SLCO4A1  | NM_016354                                     | SLCO4A1:NM_016354:exon2:c.G193A:p.E65K                                                                                                                                   |
| 20 | 62199985 | C | T | HELZ2    | NM_001037335                                  | HELZ2:NM_001037335:exon6:c.G1456A:p.D486N                                                                                                                                |
| 20 | 62326159 | G | A | RTEL1    | NM_001283009,NM_001283010,NM_016434,NM_032957 | RTEL1:NM_001283010:exon31:c.G2506A:p.A836T,RTEL1:NM_001283009:exon32:c.G3175A:p.A1059T,RTEL1:NM_016434:exon32:c.G3175A:p.A1059T,RTEL1:NM_032957:exon32:c.G3247A:p.A1083T |
| 21 | 15882747 | G | C | SAMSN1   | NM_001256370,NM_001286523,NM_022136           | SAMSN1:NM_022136:exon5:c.C445G:p.R149G,SAMSN1:NM_001256370:exon6:c.C649G:p.R217G,SAMSN1:NM_001286523:exon6:c.C238G:p.R80G                                                |

|    |          |   |   |           |                                                               |                                                                                                                                                                                                                          |
|----|----------|---|---|-----------|---------------------------------------------------------------|--------------------------------------------------------------------------------------------------------------------------------------------------------------------------------------------------------------------------|
| 21 | 15974340 | T | C | LOC388813 | NM_001256579                                                  | .                                                                                                                                                                                                                        |
| 21 | 30419535 | A | G | USP16     | NM_001001992,NM_001032410,NM_006447                           | USP16:NM_001001992:exon14:c.A1901G:p.H634R,USP16:NM_006447:exon14:c.A1904G:p.H635R,USP16:NM_001032410:exon15:c.A1904G:p.H635R                                                                                            |
| 21 | 32582504 | C | T | TIAM1     | NM_003253                                                     | TIAM1:NM_003253:exon12:c.G2245A:p.V749I                                                                                                                                                                                  |
| 21 | 36164881 | C | T | RUNX1     | NM_001001890,NM_001754                                        | RUNX1:NM_001001890:exon6:c.G913A:p.D305N,RUNX1:NM_001754:exon9:c.G994A:p.D332N                                                                                                                                           |
| 21 | 38459567 | T | A | TTC3      | NM_001001894,NM_003316                                        | TTC3:NM_001001894:exon2:c.T10A:p.F4I,TTC3:NM_003316:exon2:c.T10A:p.F4I                                                                                                                                                   |
| 21 | 45825824 | C | G | TRPM2     | NM_003307                                                     | TRPM2:NM_003307:exon18:c.C2694G:p.I898M                                                                                                                                                                                  |
| 21 | 47678926 | G | C | MCM3AP    | NM_003906                                                     | MCM3AP:NM_003906:exon16:c.C3661G:p.L1221V                                                                                                                                                                                |
| 21 | 47722409 | G | C | C21orf58  | NM_001286462,NM_001286463,NM_001286476,NM_001286477,NM_058180 | C21orf58:NM_001286463:exon6:c.C485G:p.P162R,C21orf58:NM_001286462:exon7:c.C485G:p.P162R,C21orf58:NM_001286476:exon7:c.C485G:p.P162R,C21orf58:NM_001286477:exon7:c.C485G:p.P162R,C21orf58:NM_058180:exon7:c.C803G:p.P268R |
| 21 | 47738110 | C | T | C21orf58  | NM_058180                                                     | C21orf58:NM_058180:exon2:c.G125A:p.R42H                                                                                                                                                                                  |
| 22 | 19222234 | A | G | CLTCL1    | NM_001835,NM_007098                                           | .                                                                                                                                                                                                                        |
| 22 | 21989008 | C | G | CCDC116   | NM_152612                                                     | CCDC116:NM_152612:exon4:c.C656G:p.S219C                                                                                                                                                                                  |
| 22 | 24743090 | C | T | SPECC1L   | NM_001145468,NM_001254732,NM_015330                           | SPECC1L:NM_001145468:exon10:c.C2689T:p.P897S,SPECC1L:NM_001254732:exon10:c.C2689T:p.P897S,SPECC1L:NM_015330:exon11:c.C2689T:p.P897S                                                                                      |
| 22 | 25264363 | G | C | SGSM1     | NM_001039948,NM_001098497,NM_001098498,NM_133454              | SGSM1:NM_001039948:exon11:c.G1015C:p.V339L,SGSM1:NM_001098497:exon11:c.G1015C:p.V339L,SGSM1:NM_001098498:exon11:c.G1015C:p.V339L,SGSM1:NM_133454:exon11:c.G1015C:p.V339L                                                 |
| 22 | 25425282 | A | G | KIAA1671  | NM_001145206                                                  | KIAA1671:NM_001145206:exon1:c.A1316G:p.K439R                                                                                                                                                                             |
| 22 | 30200621 | A | G | ASCC2     | NM_001242906,NM_032204                                        | .                                                                                                                                                                                                                        |
| 22 | 31007023 | A | T | TCN2      | NM_000355,NM_001184726                                        | TCN2:NM_000355:exon2:c.A230T:p.K77M,TCN2:NM_001184726:exon2:c.A230T:p.K77M                                                                                                                                               |
| 22 | 31521167 | C | T | INPP5J    | NM_001284285,NM_001284286                                     | INPP5J:NM_001284285:exon2:c.C442T:p.P148S,INPP5J:NM_001284286:exon3:c.C241T:p.P81S                                                                                                                                       |
| 22 | 37770023 | C | T | ELFN2     | NM_052906                                                     | ELFN2:NM_052906:exon3:c.G1552A:p.E518K                                                                                                                                                                                   |

|    |           |   |   |          |                                                         |                                                                                                                                                                                                          |
|----|-----------|---|---|----------|---------------------------------------------------------|----------------------------------------------------------------------------------------------------------------------------------------------------------------------------------------------------------|
| 22 | 37962756  | G | A | CDC42EP1 | NM_152243                                               | CDC42EP1:NM_152243:exon2:c.G400A:p.V134M                                                                                                                                                                 |
| 22 | 38902067  | G | A | DDX17    | NM_001098504,NM_006386                                  | DDX17:NM_001098504:exon1:c.C176T:p.P59L,DDX17:NM_006386:exon1:c.C176T:p.P59L                                                                                                                             |
| 22 | 40814581  | C | T | MKL1     | NM_001282660,NM_001282661,NM_001282662,NM_020831        | MKL1:NM_001282660:exon9:c.G1861A:p.V621M,MKL1:NM_001282661:exon11:c.G1711A:p.V571M,MKL1:NM_001282662:exon12:c.G1861A:p.V621M,MKL1:NM_020831:exon12:c.G1861A:p.V621M                                      |
| 22 | 42154488  | C | G | MEI1     | NM_152513                                               | MEI1:NM_152513:exon18:c.C2071G:p.Q691E                                                                                                                                                                   |
| 22 | 50656430  | G | A | TUBGCP6  | NM_020461                                               | TUBGCP6:NM_020461:exon24:c.C5285T:p.P1762L                                                                                                                                                               |
| X  | 2936657   | C | T | ARSH     | NM_001011719                                            | ARSH:NM_001011719:exon5:c.C847T:p.R283C                                                                                                                                                                  |
| X  | 10417412  | G | A | MID1     | NM_000381,NM_001098624,NM_001193277,NM_033289,NM_033290 | MID1:NM_000381:exon10:c.C2000T:p.P667L,MID1:NM_001098624:exon10:c.C2000T:p.P667L,MID1:NM_001193277:exon10:c.C2000T:p.P667L,MID1:NM_033289:exon10:c.C1886T:p.P629L,MID1:NM_033290:exon10:c.C2000T:p.P667L |
| X  | 27998997  | C | T | DCAF8L1  | NM_001017930                                            | DCAF8L1:NM_001017930:exon1:c.G455A:p.R152Q                                                                                                                                                               |
| X  | 40560408  | T | C | MED14    | NM_004229                                               | .                                                                                                                                                                                                        |
| X  | 46949289  | A | G | RGN      | NM_001282848,NM_004683,NM_152869                        | RGN:NM_004683:exon4:c.A461G:p.N154S,RGN:NM_001282848:exon5:c.A302G:p.N101S,RGN:NM_152869:exon5:c.A461G:p.N154S                                                                                           |
| X  | 48369847  | G | A | PORCN    | NM_001282167,NM_022825,NM_203473,NM_203474,NM_203475    | PORCN:NM_203474:exon2:c.G301A:p.V101I,PORCN:NM_001282167:exon3:c.G88A:p.V30I,PORCN:NM_022825:exon3:c.G301A:p.V101I,PORCN:NM_203473:exon3:c.G301A:p.V101I,PORCN:NM_203475:exon3:c.G301A:p.V101I           |
| X  | 73641555  | G | T | SLC16A2  | NM_006517                                               | SLC16A2:NM_006517:exon1:c.G83T:p.S28I                                                                                                                                                                    |
| X  | 99849306  | A | C | TNMD     | NM_022144                                               | TNMD:NM_022144:exon4:c.A370C:p.T124P                                                                                                                                                                     |
| X  | 100503282 | A | G | DRP2     | NM_001171184,NM_001939                                  | .                                                                                                                                                                                                        |
| X  | 103294742 | G | T | H2BFM    | NM_001164416                                            | H2BFM:NM_001164416:exon1:c.G199T:p.V67L                                                                                                                                                                  |
| X  | 114425196 | G | A | RBMXL3   | NM_001145346                                            | RBMXL3:NM_001145346:exon1:c.G1192A:p.D398N                                                                                                                                                               |
| X  | 118143214 | T | C | LONRF3   | NM_001031855,NM_001289109,NM_024778                     | .                                                                                                                                                                                                        |
| X  | 140993695 | G | A | MAGEC1   | NM_005462                                               | MAGEC1:NM_005462:exon4:c.G505A:p.A169T                                                                                                                                                                   |

|   |           |   |   |       |           |                                      |
|---|-----------|---|---|-------|-----------|--------------------------------------|
| X | 150869021 | G | A | PRRG3 | NM_024082 | PRRG3:NM_024082:exon4:c.G212A:p.R71Q |
|---|-----------|---|---|-------|-----------|--------------------------------------|

**Supplementary Table S4: List of all Indel variants**

| CHROM | POS      | REF        | ALT  | GeneName | Gene                                             | AAChange                                                                                                                                                                |
|-------|----------|------------|------|----------|--------------------------------------------------|-------------------------------------------------------------------------------------------------------------------------------------------------------------------------|
| 1     | 9780693  | G          | GC   | PIK3CD   | NM_005026                                        | PIK3CD:NM_005026:exon12:c.1495_1496insC:p.E499fs                                                                                                                        |
| 1     | 9781176  | T          | TC   | PIK3CD   | NM_005026                                        | .                                                                                                                                                                       |
| 1     | 11140610 | GA         | G    | EXOSC10  | NM_001001998,NM_002685                           | .                                                                                                                                                                       |
| 1     | 11140610 | GAAAA      | G    | EXOSC10  | NM_001001998,NM_002685                           | .                                                                                                                                                                       |
| 1     | 11150700 | GC         | G    | EXOSC10  | NM_001001998,NM_002685                           | EXOSC10:NM_001001998:exon6:c.668delG:p.R223fs,EXOSC10:NM_002685:exon6:c.668delG:p.R223fs                                                                                |
| 1     | 11561092 | GAGGAGGAGC | G    | PTCHD2   | NM_020780                                        | PTCHD2:NM_020780:exon2:c.44_52del:p.15_18del                                                                                                                            |
| 1     | 14106394 | A          | ACTC | PRDM2    | NM_001007257,NM_012231,NM_015866                 | PRDM2:NM_001007257:exon3:c.1501_1502insCTC:p.T501delinsTP,PRDM2:NM_012231:exon8:c.2104_2105insCTC:p.T702delinsTP,PRDM2:NM_015866:exon8:c.2104_2105insCTC:p.T702delinsTP |
| 1     | 19634721 | A          | ATT  | AKR7A2   | NM_003689                                        | AKR7A2:NM_003689:exon3:c.521_522insAA:p.A174fs                                                                                                                          |
| 1     | 24406692 | A          | AGC  | MYOM3    | NM_152372                                        | .                                                                                                                                                                       |
| 1     | 26608877 | GCCGGGA    | G    | UBXN11   | NM_001077262,NM_145345,NM_183008                 | UBXN11:NM_001077262:exon11:c.1110_1115del:p.370_372del,UBXN11:NM_145345:exon15:c.1371_1376del:p.457_459del,UBXN11:NM_183008:exon16:c.1470_1475del:p.490_492del          |
| 1     | 46655241 | T          | TGC  | POMGNT1  | NM_001243766,NM_001290129,NM_001290130,NM_017739 | .                                                                                                                                                                       |
| 1     | 50884773 | CCGGCGG    | C    | DMRTA2   | NM_032110                                        | DMRTA2:NM_032110:exon3:c.1187_1192del:p.396_398del                                                                                                                      |
| 1     | 57538096 | G          | GA   | DAB1     | NM_021080                                        | .                                                                                                                                                                       |
| 1     | 62910509 | AAAG       | A    | USP1     | NM_001017415,NM_001017416,NM_003368              | USP1:NM_001017415:exon6:c.659_661del:p.220_221del,USP1:NM_001017416:exon6:c.659_661del:p.220_221del,USP1:NM_003368:exon6:c.659_661del:p.220_221del                      |

|   |           |                     |                             |          |                                                                                                    |                                                                                                                                       |
|---|-----------|---------------------|-----------------------------|----------|----------------------------------------------------------------------------------------------------|---------------------------------------------------------------------------------------------------------------------------------------|
| 1 | 92944314  | C                   | CAGAG                       | GFI1     | NM_001127215,NM_001127216,NM_005263                                                                | .                                                                                                                                     |
| 1 | 103471456 | CCAT                | C                           | COL11A1  | NM_001190709,NM_001854,NM_080629,NM_080630                                                         | .                                                                                                                                     |
| 1 | 152681689 | G                   | GGGCTG<br>CTGTAGC<br>TCTGGC | LCE4A    | NM_178356                                                                                          | LCE4A:NM_178356:exon1:c.138_139insGGCTGCTGTAGCTCTGGC:p.G46delinsGGCCSSG                                                               |
| 1 | 153509779 | TTG                 | T                           | S100A5   | NM_002962                                                                                          | S100A5:NM_002962:exon4:c.270_271del:p.D90fs                                                                                           |
| 1 | 153907278 | CCTGCTGCTGC         | C                           | DENND4B  | NM_014856                                                                                          | DENND4B:NM_014856:exon18:c.2722_2730del:p.908_910del                                                                                  |
| 1 | 154842199 | G                   | GGCTGCT<br>GCTGCT           | KCNN3    | NM_001204087,NM_002249                                                                             | KCNN3:NM_001204087:exon1:c.241_242insAGCAGCAGCAGC:p.P81delinsQQQQP,KCNN3:NM_002249:exon1:c.241_242insAGCAGCAGCAGC:p.P81delinsQQQQP    |
| 1 | 154842199 | G                   | GGCTGCT<br>GCTGCTG<br>CT    | KCNN3    | NM_001204087,NM_002249                                                                             | KCNN3:NM_001204087:exon1:c.241_242insAGCAGCAGCAGC:p.P81delinsQQQQP,KCNN3:NM_002249:exon1:c.241_242insAGCAGCAGCAGCAGC:p.P81delinsQQQQP |
| 1 | 155026379 | T                   | TG                          | ADAM15   | NM_001261464,NM_001261465,NM_001261466,NM_003815,NM_207191,NM_207194,NM_207195,NM_207196,NM_207197 | .                                                                                                                                     |
| 1 | 160394903 | T                   | TGC                         | VANGL2   | NM_020335                                                                                          | .                                                                                                                                     |
| 1 | 161192845 | CCACACACA<br>CACA   | C                           | APOA2    | NM_001643                                                                                          | .                                                                                                                                     |
| 1 | 161192845 | CCACACA             | C                           | APOA2    | NM_001643                                                                                          | .                                                                                                                                     |
| 1 | 161192845 | CCACACACA<br>CACACA | C                           | APOA2    | NM_001643                                                                                          | .                                                                                                                                     |
| 1 | 161192845 | CCACACACA           | C                           | APOA2    | NM_001643                                                                                          | .                                                                                                                                     |
| 1 | 168262522 | A                   | AGT                         | TBX19    | NM_005149                                                                                          | .                                                                                                                                     |
| 1 | 175129924 | C                   | CCTT                        | KIAA0040 | NM_001162893,NM_001162894,NM_001162895,NM_014656                                                   | KIAA0040:NM_001162895:exon3:c.225_226insAAG:p.D76delinsKD,KIAA0040:NM_001162894:exon4:c.225_226insAAG:p.D76delinsKD,KIAA0040          |

|   |           |                                               |       |          |                                                               |                                                                                                                                                                                                                                                                  |
|---|-----------|-----------------------------------------------|-------|----------|---------------------------------------------------------------|------------------------------------------------------------------------------------------------------------------------------------------------------------------------------------------------------------------------------------------------------------------|
|   |           |                                               |       |          |                                                               | :NM_014656:exon4:c.225_226insAAG:p.D76delinsKD,KIAA0040:NM_001162893:exon5:c.225_226insAAG:p.D76delinsKD                                                                                                                                                         |
| 1 | 175299236 | C                                             | CAA   | TNR      | NM_003285                                                     | TNR:NM_003285:exon21:c.3766_3767insTT:p.R1256fs                                                                                                                                                                                                                  |
| 1 | 186276267 | GGAGCCTGC<br>ACCCACCAC<br>TCCCAA              | G     | PRG4     | NM_001127708,NM_001127709,NM_001127710,NM_001303232,NM_005807 | PRG4:NM_001127710:exon4:c.1015_1038del:p.339_346del,PRG4:NM_001127709:exon5:c.1138_1161del:p.380_387del,PRG4:NM_001127708:exon6:c.1294_1317del:p.432_439del,PRG4:NM_001303232:exon6:c.1288_1311del:p.430_437del,PRG4:NM_005807:exon7:c.1417_1440del:p.473_480del |
| 1 | 209605636 | TAGCAGCAG<br>CAGC                             | T     | MIR205HG | NM_001104548                                                  | MIR205HG:NM_001104548:exon4:c.252_263del:p.84_88del                                                                                                                                                                                                              |
| 1 | 209800739 | G                                             | GC    | LAMB3    | NM_000228,NM_001017402,NM_001127641                           | LAMB3:NM_001017402:exon11:c.1473_1474insG:p.Q492fs,LAMB3:NM_000228:exon12:c.1473_1474insG:p.Q492fs,LAMB3:NM_001127641:exon12:c.1473_1474insG:p.Q492fs                                                                                                            |
| 1 | 213068548 | G                                             | GATTA | FLVCR1   | NM_014053                                                     | .                                                                                                                                                                                                                                                                |
| 1 | 225707213 | TCGCTCCAGC<br>CTTCC                           | T     | ENAH     | NM_001008493,NM_018212                                        | ENAH:NM_001008493:exon5:c.474_488del:p.158_163del,ENAH:NM_018212:exon5:c.474_488del:p.158_163del                                                                                                                                                                 |
| 2 | 10808776  | C                                             | CAA   | NOL10    | NM_001261392,NM_001261394,NM_001261394                        | .                                                                                                                                                                                                                                                                |
| 2 | 27728668  | T                                             | TA    | GCKR     | NM_001486                                                     | GCKR:NM_001486:exon10:c.835dupA:p.H278fs                                                                                                                                                                                                                         |
| 2 | 48033791  | GTAAC                                         | G     | MSH6     | NM_000179,NM_001281492,NM_001281493,NM_001281494              | .                                                                                                                                                                                                                                                                |
| 2 | 61390244  | GAGACAGAG<br>TAAGGAAGT<br>GTTGGCCAC<br>ACCCTT | G     | C2orf74  | NM_001143959,NM_001143960                                     | C2orf74:NM_001143959:exon3:c.289_320del:p.R97fs,C2orf74:NM_001143960:exon3:c.52_83del:p.R18fs                                                                                                                                                                    |
| 2 | 69553373  | AAG                                           | A     | GFPT1    | NM_001244710,NM_002056                                        | .                                                                                                                                                                                                                                                                |
| 2 | 102483033 | G                                             | GGC   | MAP4K4   | NM_001242559,NM_001242560,NM_001242560,NM_145686,NM_145687    | MAP4K4:NM_004834:exon17:c.1859_1860insGC:p.R620fs,MAP4K4:NM_001242559:exon18:c.2114                                                                                                                                                                              |



|   |           |                                       |       |        |                                                                                         |                                                                                                                                                                               |
|---|-----------|---------------------------------------|-------|--------|-----------------------------------------------------------------------------------------|-------------------------------------------------------------------------------------------------------------------------------------------------------------------------------|
|   |           |                                       |       |        |                                                                                         | _2115insGC:p.R705fs,MAP4K4:NM_001242560:exon18:c.2093_2094insGC:p.R698fs,MAP4K4:NM_145686:exon18:c.2024_2025insGC:p.R675fs,MAP4K4:NM_145687:exon18:c.2024_2025insGC:p.R675fs  |
| 2 | 103130575 | T                                     | TA    | SLC9A4 | NM_001011552                                                                            | SLC9A4:NM_001011552:exon8:c.1587dupA:p.L529fs                                                                                                                                 |
| 2 | 128526579 | T                                     | TTAAA | WDR33  | NM_001006622,NM_001006623,NM_018383                                                     | .                                                                                                                                                                             |
| 2 | 131486737 | C                                     | CG    | GPR148 | NM_207364                                                                               | GPR148:NM_207364:exon1:c.13_14insG:p.L5fs                                                                                                                                     |
| 2 | 151328284 | GA                                    | G     | RND3   | NM_001254738,NM_005168                                                                  | .                                                                                                                                                                             |
| 2 | 151343978 | GAAAAA                                | G     | RND3   | NM_005168                                                                               | .                                                                                                                                                                             |
| 2 | 152402513 | C                                     | CT    | NEB    | NM_001164507,NM_001164508,NM_01271208,NM_004543                                         | .                                                                                                                                                                             |
| 2 | 160958349 | GAA                                   | G     | ITGB6  | NM_000888,NM_001282353,NM_001282354,NM_001282355,NM_001282388,NM_001282389,NM_001282390 | .                                                                                                                                                                             |
| 2 | 162876813 | G                                     | GTT   | DPP4   | NM_001935                                                                               | .                                                                                                                                                                             |
| 2 | 179542570 | TTTC                                  | T     | TTN    | NM_001256850,NM_001267550,NM_133378                                                     | TTN:NM_133378:exon143:c.30334_30336del:p.10112_10112del,TTN:NM_001256850:exon144:c.33115_33117del:p.11039_11039del,TTN:NM_001267550:exon146:c.34066_34068del:p.11356_11356del |
| 2 | 206364764 | A                                     | ATT   | PARD3B | NM_001302769,NM_057177,NM_152526,NM_205863                                              | .                                                                                                                                                                             |
| 2 | 218712886 | GGCT                                  | G     | TNS1   | NM_022648                                                                               | TNS1:NM_022648:exon17:c.1976_1978del:p.659_660del                                                                                                                             |
| 2 | 231861032 | TCAGCAGCCT<br>AGCCCTGAATT<br>CCACACCA |       | SPATA3 | NM_139073                                                                               | SPATA3:NM_139073:exon1:c.85_111del:p.29_37del                                                                                                                                 |
| 2 | 233712226 | C                                     | CGCA  | GIGYF2 | NM_001103146,NM_001103147,NM_01103148,NM_015575                                         | GIGYF2:NM_001103148:exon26:c.3611_3612insGCA:p.P1204delinsPQ,GIGYF2:NM_001103146:exon27:c.3629_3630insGCA:p.P1210delinsPQ,GIG                                                 |

|   |           |         |         |         |                                                 |                                                                                                                                                                                           |
|---|-----------|---------|---------|---------|-------------------------------------------------|-------------------------------------------------------------------------------------------------------------------------------------------------------------------------------------------|
|   |           |         |         |         |                                                 | YF2:NM_001103147:exon29:c.3692_3693insGCA:p.P1231delinsPQ,GIGYF2:NM_015575:exon29:c.3629_3630insGCA:p.P1210delinsPQ                                                                       |
| 2 | 241696837 | CTCA    | C       | KIF1A   | NM_001244008                                    | KIF1A:NM_001244008:exon27:c.2754_2756del:p.918_919del                                                                                                                                     |
| 2 | 241696840 | ATCC    | A       | KIF1A   | NM_001244008                                    | KIF1A:NM_001244008:exon27:c.2751_2753del:p.917_918del                                                                                                                                     |
| 3 | 1339680   | GGTTTTT | G       | CNTN6   | NM_001289080,NM_001289081,NM_014461             | .                                                                                                                                                                                         |
| 3 | 12942850  | GC      | G       | IQSEC1  | NM_001134382                                    | .                                                                                                                                                                                         |
| 3 | 24270500  | G       | GA      | THRB    | NM_000461,NM_001128176,NM_00128177,NM_001252634 | .                                                                                                                                                                                         |
| 3 | 27763427  | G       | GCGC    | EOMES   | NM_001278182,NM_005442                          | EOMES:NM_001278182:exon1:c.358_359insGCG;p.A120delinsGA,EOMES:NM_005442:exon1:c.358_359insGCG;p.A120delinsGA                                                                              |
| 3 | 33907835  | T       | TCTCC   | PDCD6IP | NM_001162429,NM_013374                          | .                                                                                                                                                                                         |
| 3 | 42251577  | C       | CGGA    | TRAK1   | NM_001265608,NM_001265609,NM_014965             | TRAK1:NM_001265609:exon13:c.1841_1842insGGA:p.T614delinsTE,TRAK1:NM_014965:exon13:c.1889_1890insGGA:p.T630delinsTE,TRAK1:NM_001265608:exon14:c.2063_2064insGGA:p.T688delinsTE             |
| 3 | 42251577  | C       | CGGAGGA | TRAK1   | NM_001265608,NM_001265609,NM_014965             | TRAK1:NM_001265609:exon13:c.1841_1842insGGAGGA:p.T614delinsTEE,TRAK1:NM_014965:exon13:c.1889_1890insGGAGGA:p.T630delinsTEE,TRAK1:NM_001265608:exon14:c.2063_2064insGGAGGA:p.T688delinsTEE |
| 3 | 49395673  | GGCCGCC | G       | GPX1    | NM_000581,NM_201397                             | UNKNOWN                                                                                                                                                                                   |
| 3 | 50329644  | T       | TGC     | IFRD2   | NM_006764                                       | .                                                                                                                                                                                         |
| 3 | 53910109  | T       | TG      | ACTR8   | NM_022899                                       | .                                                                                                                                                                                         |
| 3 | 54959058  | AT      | A       | LRTM1   | NM_020678                                       | LRTM1:NM_020678:exon2:c.191delA:p.H64fs                                                                                                                                                   |
| 3 | 56650051  | A       | ACTT    | CCDC66  | NM_001012506,NM_001141947                       | CCDC66:NM_001012506:exon13:c.1711_1712insCTT:p.T571delinsTS,CCDC66:NM_001141947:exon13:c.1813_1814insCTT:p.T605delinsTS                                                                   |

|   |           |            |         |          |                                        |                                                                                                                                                                         |
|---|-----------|------------|---------|----------|----------------------------------------|-------------------------------------------------------------------------------------------------------------------------------------------------------------------------|
| 3 | 56650054  | T          | TCTC    | CCDC66   | NM_001012506,NM_001141947              | CCDC66:NM_001012506:exon13:c.1714_1715insCTC;p.S572delinsSP,CCDC66:NM_001141947:exon13:c.1816_1817insCTC;p.S606delinsSP                                                 |
| 3 | 57291464  | A          | AT      | APPL1    | NM_012096                              | .                                                                                                                                                                       |
| 3 | 65425560  | T          | TCTG    | MAGI1    | NM_001033057,NM_004742,NM_015520       | MAGI1:NM_001033057:exon9:c.1263_1264insCAG;p.T422delinsQT,MAGI1:NM_004742:exon9:c.1263_1264insCAG;p.T422delinsQT,MAGI1:NM_015520:exon9:c.1263_1264insCAG;p.T422delinsQT |
| 3 | 75786555  | C          | CTG     | ZNF717   | NM_001128223,NM_001290208,NM_001290209 | ZNF717:NM_001128223:exon5:c.2218_2219insCA;p.C740fs,ZNF717:NM_001290208:exon5:c.2218_2219insCA;p.C740fs,ZNF717:NM_001290209:exon5:c.2068_2069insCA;p.C690fs             |
| 3 | 75786817  | CACATTCATT | C       | ZNF717   | NM_001128223,NM_001290208,NM_001290209 | ZNF717:NM_001128223:exon5:c.1948_1956del;p.650_652del,ZNF717:NM_001290208:exon5:c.1948_1956del;p.650_652del,ZNF717:NM_001290209:exon5:c.1798_1806del;p.600_602del       |
| 3 | 75787645  | GAA        | G       | ZNF717   | NM_001128223,NM_001290208,NM_001290209 | ZNF717:NM_001128223:exon5:c.1127_1128del;p.F376fs,ZNF717:NM_001290208:exon5:c.1127_1128del;p.F376fs,ZNF717:NM_001290209:exon5:c.977_978del;p.F326fs                     |
| 3 | 107097080 | CAAATG     | C       | CCDC54   | NM_032600                              | CCDC54:NM_032600:exon1:c.647_651del;p.Q216fs                                                                                                                            |
| 3 | 108179219 | CA         | C       | MYH15    | NM_014981                              | .                                                                                                                                                                       |
| 3 | 108754320 | T          | TAA     | MORC1    | NM_014429                              | .                                                                                                                                                                       |
| 3 | 113003419 | C          | CTT     | BOC      | NM_001301861,NM_033254                 | .                                                                                                                                                                       |
| 3 | 113376110 | TTGC       | T       | KIAA2018 | NM_001009899                           | KIAA2018:NM_001009899:exon7:c.4416_4418del;p.1472_1473del                                                                                                               |
| 3 | 113376110 | TTGCTGC    | T       | KIAA2018 | NM_001009899                           | KIAA2018:NM_001009899:exon7:c.4413_4418del;p.1471_1473del                                                                                                               |
| 3 | 113376110 | TTGCTGCTGC | T       | KIAA2018 | NM_001009899                           | KIAA2018:NM_001009899:exon7:c.4410_4418del;p.1470_1473del                                                                                                               |
| 3 | 124066121 | C          | CTGTG   | KALRN    | NM_001024660,NM_003947                 | .                                                                                                                                                                       |
| 3 | 124066121 | C          | CTGTGTG | KALRN    | NM_001024660,NM_003947                 | .                                                                                                                                                                       |

|   |           |                |                |         |                                                  |                                                                                                                                                    |
|---|-----------|----------------|----------------|---------|--------------------------------------------------|----------------------------------------------------------------------------------------------------------------------------------------------------|
|   |           |                | TG             |         |                                                  |                                                                                                                                                    |
| 3 | 124515240 | CAGA           | C              | ITGB5   | NM_002213                                        | ITGB5:NM_002213:exon10:c.1685_1687del:p.562563del                                                                                                  |
| 3 | 124998098 | C              | CAAA           | ZNF148  | NM_021964                                        | .                                                                                                                                                  |
| 3 | 130290036 | G              | GCTGATA<br>AA  | COL6A6  | NM_001102608                                     | COL6A6:NM_001102608:exon6:c.2776_2777insCTGATAAA:p.A926fs                                                                                          |
| 3 | 158537427 | TTTTTA         | T              | MFSD1   | NM_001167903,NM_001289406,NM_001289407,NM_022736 | .                                                                                                                                                  |
| 3 | 158537431 | TA             | T              | MFSD1   | NM_001167903,NM_001289406,NM_001289407,NM_022736 | .                                                                                                                                                  |
| 3 | 167747641 | C              | CCTG           | GOLIM4  | NM_014498                                        | GOLIM4:NM_014498:exon10:c.1359_1360insCAG:p.V454delinsQV                                                                                           |
| 3 | 183493743 | CGGA           | C              | YEATS2  | NM_018023                                        | YEATS2:NM_018023:exon18:c.2410_2412del:p.804_804del                                                                                                |
| 3 | 183493743 | C              | CGGA           | YEATS2  | NM_018023                                        | YEATS2:NM_018023:exon18:c.2409_2410insGGA:p.A803delinsAG                                                                                           |
| 3 | 184429133 | A              | ATCC           | MAGEF1  | NM_022149                                        | MAGEF1:NM_022149:exon1:c.476_477insGGA:p.D159delinsED                                                                                              |
| 3 | 195792300 | GGGGC          | G              | TFRC    | NM_001128148,NM_003234                           | .                                                                                                                                                  |
| 3 | 197880130 | GGCAGCAGC<br>A | G              | FAM157A | NM_001145248                                     | FAM157A:NM_001145248:exon2:c.210_218del:p.70_73del                                                                                                 |
| 3 | 197880130 | GGCAGCA        | G              | FAM157A | NM_001145248                                     | FAM157A:NM_001145248:exon2:c.210_215del:p.70_72del                                                                                                 |
| 4 | 1019054   | CCA            | C              | FGFRL1  | NM_001004356,NM_001004358,NM_021923              | FGFRL1:NM_021923:exon6:c.1435_1436del:p.H479fs,FGFRL1:NM_001004356:exon7:c.1435_1436del:p.H479fs,FGFRL1:NM_001004358:exon7:c.1435_1436del:p.H479fs |
| 4 | 3076603   | CCAGCAGCA<br>G | C              | HTT     | NM_002111                                        | HTT:NM_002111:exon1:c.52_60del:p.18_20del                                                                                                          |
| 4 | 3076665   | A              | AGCCGC<br>CCCC | HTT     | NM_002111                                        | HTT:NM_002111:exon1:c.113_114insGCCGCC<br>CC:p.Q38delinsQPPP                                                                                       |
| 4 | 3076672   | A              | ACCGCC         | HTT     | NM_002111                                        | HTT:NM_002111:exon1:c.120_121insCCGCCGC                                                                                                            |

|   |           |       |                   |          |                     |                                                                                               |
|---|-----------|-------|-------------------|----------|---------------------|-----------------------------------------------------------------------------------------------|
|   |           |       | GCCG              |          |                     | CG:p.P40delinsPPPP                                                                            |
| 4 | 17634256  | C     | CAA               | FAM184B  | NM_015688           | .                                                                                             |
| 4 | 36162273  | C     | CA                | ARAP2    | NM_015230           | .                                                                                             |
| 4 | 104007666 | TTGA  | T                 | BDH2     | NM_020139           | BDH2:NM_020139:exon6:c.386_388del:p.129_130del                                                |
| 4 | 147560457 | T     | TGGC              | POU4F2   | NM_004575           | POU4F2:NM_004575:exon1:c.165_166insGGC:p.G55delinsGG                                          |
| 4 | 155244401 | TTTTG | T                 | DCHS2    | NM_001142552        | DCHS2:NM_001142552:exon8:c.4095_4098del:p.N1365fs                                             |
| 4 | 186435871 | A     | ATT               | PDLIM3   | NM_001114107        | PDLIM3:NM_001114107:exon4:c.503_504insAA:p.P168fs                                             |
| 5 | 56177848  | TCAA  | T                 | MAP3K1   | NM_005921           | MAP3K1:NM_005921:exon14:c.2822_2824del:p.941_942del                                           |
| 5 | 68396764  | T     | TG                | SLC30A5  | NM_022902,NM_024055 | .                                                                                             |
| 5 | 79028932  | TC    | T                 | CMYA5    | NM_153610           | CMYA5:NM_153610:exon2:c.4345delC:p.P1449fs                                                    |
| 5 | 79950724  | G     | GCCGCA<br>GCGC    | MSH3     | NM_002439           | MSH3:NM_002439:exon1:c.178_179insCCGCAGCGC:p.A60delinsAAAP                                    |
| 5 | 90002217  | ACT   | A                 | GPR98    | NM_032119           | .                                                                                             |
| 5 | 90002219  | TC    | T                 | GPR98    | NM_032119           | .                                                                                             |
| 5 | 90002220  | C     | CT                | GPR98    | NM_032119           | .                                                                                             |
| 5 | 111500816 | C     | CTAAAA            | EPB41L4A | NM_022140           | .                                                                                             |
| 5 | 112824027 | T     | TGCTGCT<br>GCTGCC | MCC      | NM_001085377        | MCC:NM_001085377:exon1:c.84_85insGGCAGCAGCAGC:p.S29delinsGSSSS                                |
| 5 | 113698631 | T     | TGCC              | KCNN2    | NM_021614           | KCNN2:NM_021614:exon1:c.159_160insGCC:p.A53delinsAA                                           |
| 5 | 115338955 | C     | CAA               | AQPEP    | NM_173800           | LVRN:NM_173800:exon12:c.1915_1916insAA:p.Q639fs                                               |
| 5 | 139931628 | A     | AGTC              | SRA1     | NM_001035235        | SRA1:NM_001035235:exon3:c.328_329insGAC:p.V110delinsGL                                        |
| 5 | 140223109 | GGCAA | G                 | PCDHA8   | NM_018911,NM_031856 | PCDHA8:NM_018911:exon1:c.2204_2207del:p.G735fs,PCDHA8:NM_031856:exon1:c.2204_2207del:p.G735fs |

|   |           |                                    |      |           |                                                               |                                                                                                                                                              |
|---|-----------|------------------------------------|------|-----------|---------------------------------------------------------------|--------------------------------------------------------------------------------------------------------------------------------------------------------------|
| 5 | 140953540 | C                                  | CAA  | DIAPH1    | NM_001079812,NM_005219                                        | DIAPH1:NM_001079812:exon15:c.1849_1850insTT:p.C617fs,DIAPH1:NM_005219:exon16:c.1876_1877insTT:p.C626fs                                                       |
| 5 | 158588633 | GAAAAA                             | G    | RNF145    | NM_001199380,NM_001199381,NM_001199382,NM_001199383,NM_144726 |                                                                                                                                                              |
| 5 | 167881029 | TGGA                               | T    | WWC1      | NM_001161661,NM_001161662,NM_0015238                          | WWC1:NM_001161661:exon18:c.2583_2585del:p.861_862del,WWC1:NM_001161662:exon18:c.2583_2585del:p.861_862del,WWC1:NM_0015238:exon18:c.2583_2585del:p.861_862del |
| 5 | 175811094 | C                                  | CGT  | NOP16     | NM_001256539,NM_001256540,NM_001291305                        | NOP16:NM_001256539:exon5:c.586_587insAC:p.R196fs,NOP16:NM_001256540:exon5:c.583_584insAC:p.R195fs,NOP16:NM_001291305:exon5:c.544_545insAC:p.R182fs           |
| 5 | 175811094 | C                                  | CAT  | NOP16     | NM_001256539,NM_001256540,NM_001291305                        | NOP16:NM_001256539:exon5:c.586_587insAT:p.R196fs,NOP16:NM_001256540:exon5:c.583_584insAT:p.R195fs,NOP16:NM_001291305:exon5:c.544_545insAT:p.R182fs           |
| 5 | 176026119 | TCTCAAAGA<br>CCCAGGATCCT<br>TCCTTC |      | GPRIN1    | NM_052899                                                     | GPRIN1:NM_052899:exon2:c.693_716del:p.231_239del                                                                                                             |
| 5 | 179306693 | C                                  | CAA  | TBC1D9B   | NM_015043,NM_198868                                           | TBC1D9B:NM_015043:exon8:c.1350_1351insTT:p.A451fs,TBC1D9B:NM_198868:exon8:c.1350_1351insTT:p.A451fs                                                          |
| 6 | 1612017   | A                                  | ACGG | FOXC1     | NM_001453                                                     | FOXC1:NM_001453:exon1:c.1337_1338insCGG:p.H446delinsHG                                                                                                       |
| 6 | 16327864  | G                                  | GTGC | ATXN1     | NM_000332,NM_001128164                                        | ATXN1:NM_001128164:exon7:c.677_678insGCA:p.H226delinsQH,ATXN1:NM_000332:exon8:c.677_678insGCA:p.H226delinsQH                                                 |
| 6 | 16327864  | GTGCTGCTGC<br>TGC                  | G    | ATXN1     | NM_000332,NM_001128164                                        | ATXN1:NM_001128164:exon7:c.666_677del:p.222_226del,ATXN1:NM_000332:exon8:c.666_677del:p.222_226del                                                           |
| 6 | 29760352  | CGCGGGCGC<br>CGTGGATGG             | C    | LOC554223 | NM_001207043                                                  | LOC554223:NM_001207043:exon2:c.438_458del:p.146_153del                                                                                                       |

|   |          |                   |             |         |                                                               |                                                                                                                                                                                                                                                                       |
|---|----------|-------------------|-------------|---------|---------------------------------------------------------------|-----------------------------------------------------------------------------------------------------------------------------------------------------------------------------------------------------------------------------------------------------------------------|
|   |          | AGCA              |             |         |                                                               |                                                                                                                                                                                                                                                                       |
| 6 | 32053856 | G                 | GC          | TNXB    | NM_019105                                                     | TNXB:NM_019105:exon7:c.2818_2819insG:p.P940fs                                                                                                                                                                                                                         |
| 6 | 32191658 | TAGCAGCAG<br>CAGC | T           | NOTCH4  | NM_004557                                                     | NOTCH4:NM_004557:exon1:c.36_47del:p.12_16del                                                                                                                                                                                                                          |
| 6 | 32369586 | GAA               | G           | BTNL2   | NM_001304561,NM_019602                                        | .                                                                                                                                                                                                                                                                     |
| 6 | 33287880 | GCCT              | G           | DAXX    | NM_001141969,NM_001141970,NM_001254717,NM_001350              | DAXX:NM_001254717:exon4:c.1145_1147del:p.382_383del,DAXX:NM_001141969:exon5:c.1370_1372del:p.457_458del,DAXX:NM_001141970:exon5:c.1406_1408del:p.469_470del,DAXX:NM_001350:exon5:c.1370_1372del:p.457_458del                                                          |
| 6 | 33412257 | C                 | CAA         | SYNGAP1 | NM_006772                                                     | SYNGAP1:NM_006772:exon16:c.3445_3446insAA:p.P1149fs                                                                                                                                                                                                                   |
| 6 | 34735676 | C                 | CCTCAT      | SNRPC   | NM_003093                                                     | .                                                                                                                                                                                                                                                                     |
| 6 | 34857302 | G                 | GGGCGG<br>C | ANKS1A  | NM_015245                                                     | ANKS1A:NM_015245:exon1:c.123_124insGGCGGC:p.G41delinsGGG                                                                                                                                                                                                              |
| 6 | 35108989 | TC                | T           | TCP11   | NM_001093728,NM_001261817,NM_001261818,NM_001261819           | TCP11:NM_001093728:exon1:c.17delG:p.G6fs,TCP11:NM_001261817:exon1:c.17delG:p.G6fs,TCP11:NM_001261818:exon1:c.17delG:p.G6fs,TCP11:NM_001261819:exon1:c.17delG:p.G6fs                                                                                                   |
| 6 | 42989413 | CGCCGGG           | C           | RRP36   | NM_033112                                                     | RRP36:NM_033112:exon1:c.22_27del:p.8_9del                                                                                                                                                                                                                             |
| 6 | 46830665 | C                 | CAA         | GPR116  | NM_001098518,NM_015234                                        | ADGRF5:NM_001098518:exon15:c.2158_2159insTT:p.C720fs,ADGRF5:NM_015234:exon15:c.2158_2159insTT:p.C720fs                                                                                                                                                                |
| 6 | 73331983 | A                 | AGCG        | KCNQ5   | NM_001160130,NM_001160132,NM_001160133,NM_001160134,NM_019842 | KCNQ5:NM_001160130:exon1:c.66_67insGCG:p.A22delinsAA,KCNQ5:NM_001160132:exon1:c.66_67insGCG:p.A22delinsAA,KCNQ5:NM_001160133:exon1:c.66_67insGCG:p.A22delinsAA,KCNQ5:NM_001160134:exon1:c.66_67insGCG:p.A22delinsAA,KCNQ5:NM_019842:exon1:c.66_67insGCG:p.A22delinsAA |
| 6 | 96034869 | G                 | GTATA       | MANEA   | NM_024641                                                     | .                                                                                                                                                                                                                                                                     |
| 6 | 96034869 | G                 | GTA         | MANEA   | NM_024641                                                     | .                                                                                                                                                                                                                                                                     |

|   |           |         |       |              |                                                     |                                                                                                                                                                                                      |
|---|-----------|---------|-------|--------------|-----------------------------------------------------|------------------------------------------------------------------------------------------------------------------------------------------------------------------------------------------------------|
| 6 | 106987291 | G       | GC    | AIM1         | NM_001624                                           | AIM1:NM_001624:exon7:c.3508_3509insC:p.E1170fs                                                                                                                                                       |
| 6 | 108243119 | GAAAA   | G     | SEC63        | NM_007214                                           | .                                                                                                                                                                                                    |
| 6 | 108243119 | GAAAAAC | G     | SEC63        | NM_007214                                           | .                                                                                                                                                                                                    |
| 6 | 108243122 | AAAC    | A     | SEC63        | NM_007214                                           | .                                                                                                                                                                                                    |
| 6 | 109557959 | C       | CT    | LOC100996634 | NM_001277339                                        | LOC100996634:NM_001277339:exon1:c.96_97insT:p.H32fs                                                                                                                                                  |
| 6 | 116600470 | A       | ACCC  | TSPYL1       | NM_003309                                           | TSPYL1:NM_003309:exon1:c.523_524insGGG:p.V175delinsGV                                                                                                                                                |
| 6 | 123837327 | CCTTTTT | C     | TRDN         | NM_001251987,NM_001256020,NM_001256021,NM_006073    | TRDN:NM_001251987:exon6:c.503_508del:p.168_170del,TRDN:NM_001256020:exon6:c.503_508del:p.168_170del,TRDN:NM_001256021:exon6:c.503_508del:p.168_170del,TRDN:NM_006073:exon6:c.503_508del:p.168_170del |
| 6 | 132168996 | G       | GGTGT | ENPP1        | NM_006208                                           | .                                                                                                                                                                                                    |
| 6 | 132203474 | TC      | T     | ENPP1        | NM_006208                                           | .                                                                                                                                                                                                    |
| 6 | 146480740 | TTCTC   | T     | GRM1         | NM_001278064,NM_001278065,NM_001278066,NM_001278067 | .                                                                                                                                                                                                    |
| 6 | 150174133 | C       | CAA   | LRP11        | NM_032832                                           | .                                                                                                                                                                                                    |
| 6 | 151766572 | C       | CAA   | RMND1        | NM_017909                                           | RMND1:NM_017909:exon2:c.374_375insTT:p.R125fs                                                                                                                                                        |
| 6 | 157099426 | ACAG    | A     | ARID1B       | NM_017519,NM_020732                                 | ARID1B:NM_017519:exon1:c.364_366del:p.122_122del,ARID1B:NM_020732:exon1:c.364_366del:p.122_122del                                                                                                    |
| 6 | 161519350 | CCTG    | C     | MAP3K4       | NM_001291958,NM_001301072,NM_005922                 | MAP3K4:NM_001301072:exon17:c.3554_3556del:p.1185_1186del,MAP3K4:NM_005922:exon17:c.3566_3568del:p.1189_1190del,MAP3K4:NM_001291958:exon18:c.1925_1927del:p.642_643del                                |
| 6 | 170871013 | A       | ACAG  | TBP          | NM_001172085,NM_003194                              | TBP:NM_001172085:exon2:c.129_130insCAG:p.Q43delinsQQ,TBP:NM_003194:exon3:c.189_190insCAG:p.Q63delinsQQ                                                                                               |
| 6 | 170871037 | GCAA    | G     | TBP          | NM_001172085,NM_003194                              | TBP:NM_001172085:exon2:c.154_156del:p.52_52del,TBP:NM_003194:exon3:c.214_216del:p.72_72                                                                                                              |



|   |           |                |       |          |                                                     |                                                                                                                                                                                                                                          |
|---|-----------|----------------|-------|----------|-----------------------------------------------------|------------------------------------------------------------------------------------------------------------------------------------------------------------------------------------------------------------------------------------------|
|   |           |                |       |          |                                                     | del                                                                                                                                                                                                                                      |
| 6 | 170871046 | ACAGCAGCA<br>G | A     | TBP      | NM_001172085,NM_003194                              | TBP:NM_001172085:exon2:c.163_171del:p.55_57del,TBP:NM_003194:exon3:c.223_231del:p.75_77del                                                                                                                                               |
| 7 | 1586653   | A              | AGCC  | TMEM184A | NM_001097620                                        | TMEM184A:NM_001097620:exon9:c.1176_1177insGGC:p.S393delinsGS                                                                                                                                                                             |
| 7 | 2515382   | G              | GC    | GRIFIN   | NM_001291784                                        | UNKNOWN                                                                                                                                                                                                                                  |
| 7 | 2552881   | A              | AGATG | LFNG     | NM_001166355                                        | LFNG:NM_001166355:exon2:c.138_139insGATG:p.T46fs                                                                                                                                                                                         |
| 7 | 15725797  | ATGG           | A     | MEOX2    | NM_005924                                           | MEOX2:NM_005924:exon1:c.228_230del:p.76_77del                                                                                                                                                                                            |
| 7 | 19184751  | C              | CTTA  | FERD3L   | NM_152898                                           | FERD3L:NM_152898:exon1:c.234_235insTAA:p.E79delinsX                                                                                                                                                                                      |
| 7 | 22190131  | GAA            | G     | RAPGEF5  | NM_012294                                           | .                                                                                                                                                                                                                                        |
| 7 | 23854838  | G              | GA    | STK31    | NM_001260504,NM_031414,NM_032944                    | .                                                                                                                                                                                                                                        |
| 7 | 30486579  | T              | TGC   | NOD1     | NM_006092                                           | .                                                                                                                                                                                                                                        |
| 7 | 43540809  | C              | CAA   | HECW1    | NM_001287059,NM_015052                              | .                                                                                                                                                                                                                                        |
| 7 | 47479119  | C              | CAA   | TNS3     | NM_022748                                           | TNS3:NM_022748:exon6:c.115_116insTT:p.R39fs                                                                                                                                                                                              |
| 7 | 51098567  | GTCT           | G     | COBL     | NM_001287436,NM_015198                              | COBL:NM_015198:exon9:c.1443_1445del:p.481_482del,COBL:NM_001287436:exon10:c.1614_1616del:p.538_539del                                                                                                                                    |
| 7 | 54614698  | C              | CG    | VSTM2A   | NM_001301009,NM_182546                              | .                                                                                                                                                                                                                                        |
| 7 | 64169016  | T              | TGAA  | ZNF107   | NM_001013746,NM_001282359,NM_001282360,NM_016220    | ZNF107:NM_001282360:exon3:c.2445_2446insGAA:p.C815delinsCE,ZNF107:NM_001282359:exon4:c.2541_2542insGAA:p.C847delinsCE,ZNF107:NM_001013746:exon5:c.2334_2335insGAA:p.C778delinsCE,ZNF107:NM_016220:exon7:c.2334_2335insGAA:p.C778delinsCE |
| 7 | 94292825  | ACAACCTC       | A     | PEG10    | NM_001172437,NM_001172438,NM_001184961,NM_001184962 | PEG10:NM_001172438:exon2:c.186_191del:p.62_64del,PEG10:NM_001184962:exon2:c.60_65del:p.20_22del                                                                                                                                          |

|   |           |                         |                |          |                                               |                                                                                                    |
|---|-----------|-------------------------|----------------|----------|-----------------------------------------------|----------------------------------------------------------------------------------------------------|
| 7 | 102038153 | CTGTG                   | C              | PRKRIP1  | NM_024653                                     | .                                                                                                  |
| 7 | 102038153 | CTGTGTG                 | C              | PRKRIP1  | NM_024653                                     | .                                                                                                  |
| 7 | 123672456 | C                       | CGCT           | TMEM229A | NM_001136002                                  | TMEM229A:NM_001136002:exon1:c.601_602insAGC:p.R201delinsQR                                         |
| 7 | 137092745 | CA                      | C              | DGKI     | NM_004717                                     | .                                                                                                  |
| 7 | 151945071 | G                       | GT             | KMT2C    | NM_170606                                     | KMT2C:NM_170606:exon14:c.2447dupA:p.Y816I817delinsX                                                |
| 8 | 10467629  | T                       | TTTC           | RP1L1    | NM_178857                                     | RP1L1:NM_178857:exon4:c.3978_3979insGAA:p.T1327delinsET                                            |
| 8 | 11666218  | GTCCCAC                 | G              | FDFT1    | NM_001287750                                  | FDFT1:NM_001287750:exon1:c.193_198del:p.65_66del                                                   |
| 8 | 22458392  | C                       | CAA            | C8orf58  | NM_001013842,NM_001198827,NM_173686           | .                                                                                                  |
| 8 | 24350102  | TGAG                    | T              | ADAM7    | NM_003817                                     | ADAM7:NM_003817:exon15:c.1648_1650del:p.550_550del                                                 |
| 8 | 37791988  | GT                      | G              | GOT1L1   | NM_152413                                     | GOT1L1:NM_152413:exon9:c.1088delA:p.Y363fs                                                         |
| 8 | 59514103  | C                       | CAAA           | NSMAF    | NM_001144772,NM_003580                        | .                                                                                                  |
| 8 | 77765298  | ACCT                    | A              | ZFH4     | NM_024721                                     | ZFH4:NM_024721:exon10:c.6142_6144del:p.2048_2048del                                                |
| 8 | 90937720  | ATTTG                   | A              | OSGIN2   | NM_001126111,NM_004337                        | OSGIN2:NM_001126111:exon6:c.1611_1614del:p.H537fs,OSGIN2:NM_004337:exon6:c.1479_1482del:p.H493fs   |
| 8 | 101725026 | C                       | CAA            | PABPC1   | NM_002568                                     | .                                                                                                  |
| 8 | 144511953 | ATGG                    | A              | MAFA     | NM_201589                                     | MAFA:NM_201589:exon1:c.621_623del:p.207_208del                                                     |
| 8 | 144652404 | C                       | CCTCCTC<br>ACA | MROH6    | NM_001100878                                  | .                                                                                                  |
| 8 | 144671407 | TTGCGGCCCC<br>GCCGGTCTC | T              | EEF1D    | NM_001130053,NM_032378                        | EEF1D:NM_001130053:exon3:c.827_844del:p.276_282del,EEF1D:NM_032378:exon3:c.827_844del:p.276_282del |
| 9 | 2039776   | ACAG                    | A              | SMARCA2  | NM_001289396,NM_001289397,NM_003070,NM_139045 | SMARCA2:NM_001289396:exon4:c.667_669del:p.223_223del,SMARCA2:NM_001289397:exon4:c.                 |

|   |           |         |                |           |                                                                         |                                                                                                                                                                                                                                                                         |
|---|-----------|---------|----------------|-----------|-------------------------------------------------------------------------|-------------------------------------------------------------------------------------------------------------------------------------------------------------------------------------------------------------------------------------------------------------------------|
|   |           |         |                |           |                                                                         | 667_669del:p.223_223del,SMARCA2:NM_003070:exon4:c.667_669del:p.223_223del,SMARCA2:NM_139045:exon4:c.667_669del:p.223_223del                                                                                                                                             |
| 9 | 12775861  | T       | TGGCGG<br>CGGC | LURAP1L   | NM_203403                                                               | LURAP1L:NM_203403:exon1:c.147_148insGGC<br>GGCGGC:p.G49delinsGGGG                                                                                                                                                                                                       |
| 9 | 12775861  | T       | TGGCGG<br>C    | LURAP1L   | NM_203403                                                               | LURAP1L:NM_203403:exon1:c.147_148insGGC<br>GGC:p.G49delinsGGG                                                                                                                                                                                                           |
| 9 | 18826273  | TC      | T              | ADAMTSL1  | NM_001040272                                                            | .                                                                                                                                                                                                                                                                       |
| 9 | 33056971  | GA      | G              | SMU1      | NM_018225                                                               | .                                                                                                                                                                                                                                                                       |
| 9 | 34637689  | C       | CTT            | SIGMAR1   | NM_001282205,NM_001282207,NM_001282208,NM_001282209,NM_005866,NM_147157 | SIGMAR1:NM_001282205:exon1:c.5_6insAA:p.Q2fs,SIGMAR1:NM_001282207:exon1:c.5_6insAA:p.Q2fs,SIGMAR1:NM_001282208:exon1:c.5_6insAA:p.Q2fs,SIGMAR1:NM_001282209:exon1:c.5_6insAA:p.Q2fs,SIGMAR1:NM_005866:exon1:c.5_6insAA:p.Q2fs,SIGMAR1:NM_147157:exon1:c.5_6insAA:p.Q2fs |
| 9 | 78936530  | C       | CTT            | PCSK5     | NM_001190482                                                            | PCSK5:NM_001190482:exon30:c.3996_3997insTT:p.D1332fs                                                                                                                                                                                                                    |
| 9 | 95237024  | CTCA    | C              | ASPN      | NM_001193335,NM_017680                                                  | ASPN:NM_001193335:exon2:c.153_155del:p.51_52del,ASPN:NM_017680:exon2:c.153_155del:p.51_52del                                                                                                                                                                            |
| 9 | 95237024  | CTCATCA | C              | ASPN      | NM_001193335,NM_017680                                                  | ASPN:NM_001193335:exon2:c.150_155del:p.50_52del,ASPN:NM_017680:exon2:c.150_155del:p.50_52del                                                                                                                                                                            |
| 9 | 96214721  | CT      | C              | FAM120AOS | NM_198841                                                               | FAM120AOS:NM_198841:exon1:c.270delA:p.I90fs                                                                                                                                                                                                                             |
| 9 | 98678725  | C       | CTT            | ERCC6L2   | NM_001010895,NM_020207                                                  | .                                                                                                                                                                                                                                                                       |
| 9 | 100616700 | AGCCGCC | A              | FOXE1     | NM_004473                                                               | FOXE1:NM_004473:exon1:c.505_510del:p.169_170del                                                                                                                                                                                                                         |
| 9 | 115932150 | T       | TTTC           | FKBP15    | NM_015258                                                               | FKBP15:NM_015258:exon26:c.2838_2839insGAA:p.K947delinsEK                                                                                                                                                                                                                |
| 9 | 116346117 | C       | CAGG           | RGS3      | NM_001276260,NM_001282922,NM_001282923,NM_130795,NM_144488              | RGS3:NM_001276260:exon2:c.388_389insAGG:p.R130delinsQG,RGS3:NM_001282922:exon3:c.38                                                                                                                                                                                     |

|    |           |                 |         |          |                                                  |                                                                                                                                                                                                              |
|----|-----------|-----------------|---------|----------|--------------------------------------------------|--------------------------------------------------------------------------------------------------------------------------------------------------------------------------------------------------------------|
|    |           |                 |         |          |                                                  | 8_389insAGG:p.R130delinsQG,RGS3:NM_130795:exon11:c.1582_1583insAGG:p.R528delinsQG,RGS3:NM_001282923:exon18:c.2095_2096insAGG:p.R699delinsQG,RGS3:NM_144488:exon21:c.2425_2426insAGG:p.R809delinsQG           |
| 9  | 131020792 | ACCG            | A       | GOLGA2   | NM_004486                                        | GOLGA2:NM_004486:exon21:c.2147_2149del:p.716_717del                                                                                                                                                          |
| 9  | 139137538 | C               | CAA     | QSOX2    | NM_181701                                        | QSOX2:NM_181701:exon1:c.111_112insTT:p.V38fs                                                                                                                                                                 |
| 9  | 141107536 | G               | GGCA    | FAM157B  | NM_001145249                                     | FAM157B:NM_001145249:exon2:c.218_219insGCA:p.R73delinsRQ                                                                                                                                                     |
| 9  | 141107536 | GGCAGCAGCAGCA   | G       | FAM157B  | NM_001145249                                     | FAM157B:NM_001145249:exon2:c.219_230del:p.73_77del                                                                                                                                                           |
| 10 | 13658408  | C               | CAA     | PRPF18   | NM_003675                                        | PRPF18:NM_003675:exon9:c.803_804insAA:p.A268fs                                                                                                                                                               |
| 10 | 24721971  | C               | CAA     | KIAA1217 | NM_001098500,NM_001282767,NM_001282768,NM_019590 | KIAA1217:NM_001282767:exon4:c.601_602insAA:p.P201fs,KIAA1217:NM_001282768:exon4:c.601_602insAA:p.P201fs,KIAA1217:NM_019590:exon4:c.601_602insAA:p.P201fs,KIAA1217:NM_001098500:exon5:c.361_362insAA:p.P121fs |
| 10 | 72201224  | T               | TGC     | NODAL    | NM_018055                                        | .                                                                                                                                                                                                            |
| 10 | 76788659  | GGAAGAGGGA<br>A | G       | KAT6B    | NM_001256468,NM_001256469,NM_012330              | KAT6B:NM_001256468:exon18:c.3529_3537del:p.1177_1179del,KAT6B:NM_001256469:exon18:c.3202_3210del:p.1068_1070del,KAT6B:NM_012330:exon18:c.4078_4086del:p.1360_1362del                                         |
| 10 | 82331344  | C               | CTT     | SH2D4B   | NM_001145719,NM_207372                           | .                                                                                                                                                                                                            |
| 10 | 92678738  | AAAATAAAT       | A       | ANKRD1   | NM_014391                                        | .                                                                                                                                                                                                            |
| 10 | 92678738  | AAAAT           | A       | ANKRD1   | NM_014391                                        | .                                                                                                                                                                                                            |
| 10 | 95109602  | GTCT            | G       | MYOF     | NM_013451,NM_133337                              | MYOF:NM_133337:exon35:c.4004_4006del:p.1335_1336del,MYOF:NM_013451:exon36:c.4043_4045del:p.1348_1349del                                                                                                      |
| 10 | 97146882  | G               | GA      | SORBS1   | NM_001034955                                     | .                                                                                                                                                                                                            |
| 10 | 99126521  | G               | GCTCCTC | RRP12    | NM_001145114,NM_001284337,NM_001284337           | RRP12:NM_001284337:exon24:c.2892_2893insG                                                                                                                                                                    |

|    |           |                   |         |          |                                                  |                                                                                                                                                                            |
|----|-----------|-------------------|---------|----------|--------------------------------------------------|----------------------------------------------------------------------------------------------------------------------------------------------------------------------------|
|    |           |                   | CTCCTC  |          | 15179                                            | AGGAGGAGGAG:p.P965delinsEEEEP,RRP12:NM_001145114:exon25:c.3009_3010insGAGGAGGAGGAG:p.P1004delinsEEEEP,RRP12:NM_015179:exon27:c.3192_3193insGAGGAGGAGGAG:p.P1065delinsEEEEP |
| 10 | 115405703 | G                 | GAA     | NRAP     | NM_001261463,NM_006175,NM_198060                 | .                                                                                                                                                                          |
| 10 | 115804725 | G                 | GCCCTCA | ADRB1    | NM_000684                                        | ADRB1:NM_000684:exon1:c.834_835insCCCTCA:p.S278delinsSPS                                                                                                                   |
| 10 | 116085784 | C                 | CCCG    | AFAP1L2  | NM_001287824                                     | AFAP1L2:NM_001287824:exon5:c.330_331insCGG:p.G111delinsRG                                                                                                                  |
| 10 | 135203260 | C                 | CA      | PAOX     | NM_152911                                        | .                                                                                                                                                                          |
| 10 | 135236958 | CGCCGCCCC<br>GGCT | C       | SPRN     | NM_001012508                                     | SPRN:NM_001012508:exon2:c.216_227del:p.72_76del                                                                                                                            |
| 11 | 801631    | T                 | TG      | PIDD1    | NM_145886,NM_145887                              | .                                                                                                                                                                          |
| 11 | 4592706   | T                 | TAC     | C11orf40 | NM_144663                                        | C11orf40:NM_144663:exon4:c.600_601insGT:p.M201fs                                                                                                                           |
| 11 | 4592708   | C                 | CAG     | C11orf40 | NM_144663                                        | C11orf40:NM_144663:exon4:c.598_599insCT:p.C200fs                                                                                                                           |
| 11 | 6411935   | TGCTGGC           | T       | SMPD1    | NM_000543,NM_001007593                           | SMPD1:NM_000543:exon1:c.108_113del:p.36_38del,SMPD1:NM_001007593:exon1:c.108_113del:p.36_38del                                                                             |
| 11 | 6637739   | ATTTT             | A       | TPP1     | NM_000391                                        | .                                                                                                                                                                          |
| 11 | 6662745   | C                 | CCAG    | DCHS1    | NM_003737                                        | DCHS1:NM_003737:exon2:c.99_100insCTG:p.G34delinsLG                                                                                                                         |
| 11 | 20404518  | TA                | T       | HTATIP2  | NM_001098520,NM_001098521,NM_001098522,NM_006410 | .                                                                                                                                                                          |
| 11 | 20623218  | AGG               | A       | SLC6A5   | NM_004211                                        | .                                                                                                                                                                          |
| 11 | 49076963  | C                 | CAA     | TRIM64C  | NM_001206631                                     | .                                                                                                                                                                          |
| 11 | 51412326  | C                 | CAA     | OR4A5    | NM_001005272                                     | OR4A5:NM_001005272:exon1:c.69_70insTT:p.A24fs                                                                                                                              |
| 11 | 66083170  | TGAG              | T       | CD248    | NM_020404                                        | CD248:NM_020404:exon1:c.1326_1328del:p.442                                                                                                                                 |

|    |           |      |               |          |                                                 |                                                                                                                                                                                          |
|----|-----------|------|---------------|----------|-------------------------------------------------|------------------------------------------------------------------------------------------------------------------------------------------------------------------------------------------|
|    |           |      |               |          |                                                 | 443del                                                                                                                                                                                   |
| 11 | 66512290  | G    | GGGC          | C11orf80 | NM_024650                                       | C11orf80:NM_024650:exon1:c.77_78insGGC:p.G26delinsGA                                                                                                                                     |
| 11 | 72319709  | T    | TG            | PDE2A    | NM_001143839,NM_001146209,NM_01243784,NM_002599 | PDE2A:NM_001143839:exon2:c.209_210insC:p.R70fs,PDE2A:NM_001243784:exon3:c.167_168insC:p.R56fs,PDE2A:NM_002599:exon3:c.230_231insC:p.R77fs,PDE2A:NM_001146209:exon4:c.203_204insC:p.R68fs |
| 11 | 72946250  | TAGA | T             | P2RY2    | NM_002564,NM_176071,NM_176072                   | P2RY2:NM_002564:exon3:c.1047_1049del:p.349_350del,P2RY2:NM_176071:exon3:c.1047_1049del:p.349_350del,P2RY2:NM_176072:exon3:c.1047_1049del:p.349_350del                                    |
| 11 | 102738793 | G    | GT            | MMP12    | NM_002426                                       | UNKNOWN                                                                                                                                                                                  |
| 11 | 118939939 | T    | TC            | VPS11    | NM_001290185,NM_021729                          | UNKNOWN                                                                                                                                                                                  |
| 12 | 2062323   | T    | TTGC          | DCP1B    | NM_152640                                       | DCP1B:NM_152640:exon7:c.782_783insGCA:p.Q261delinsQQ                                                                                                                                     |
| 12 | 7045891   | A    | ACAGCAG       | ATN1     | NM_001007026,NM_001940                          | ATN1:NM_001007026:exon5:c.1461_1462insCAGCAG:p.Q487delinsQQQ,ATN1:NM_001940:exon5:c.1461_1462insCAGCAG:p.Q487delinsQQQ                                                                   |
| 12 | 7045891   | A    | ACAGCAGCAGCAG | ATN1     | NM_001007026,NM_001940                          | ATN1:NM_001007026:exon5:c.1461_1462insCAGCAGCAGCAG:p.Q487delinsQQQQ,ATN1:NM_001940:exon5:c.1461_1462insCAGCAGCAGCAG:p.Q487delinsQQQQ                                                     |
| 12 | 7521563   | TGA  | T             | CD163L1  | NM_001297650,NM_174941                          | .                                                                                                                                                                                        |
| 12 | 8757521   | T    | TA            | AICDA    | NM_020661                                       | .                                                                                                                                                                                        |
| 12 | 14720554  | GGCA | G             | PLBD1    | NM_024829                                       | PLBD1:NM_024829:exon1:c.74_76del:p.25_26del                                                                                                                                              |
| 12 | 15834239  | G    | GTAA          | EPS8     | NM_004447                                       | .                                                                                                                                                                                        |
| 12 | 49091968  | T    | TA            | CCNT1    | NM_001240,NM_001277842                          | .                                                                                                                                                                                        |
| 12 | 49993819  | AC   | A             | FAM186B  | NM_032130                                       | FAM186B:NM_032130:exon4:c.1603delG:p.V535fs                                                                                                                                              |
| 12 | 50232334  | C    | CT            | BCDIN3D  | NM_181708                                       | BCDIN3D:NM_181708:exon2:c.698dupA:p.Q233fs                                                                                                                                               |

|    |           |                             |                          |        |                                                               |                                                                                                                                            |
|----|-----------|-----------------------------|--------------------------|--------|---------------------------------------------------------------|--------------------------------------------------------------------------------------------------------------------------------------------|
| 12 | 52800022  | TGC                         | T                        | KRT82  | NM_033033                                                     | KRT82:NM_033033:exon1:c.38_39del:p.G13fs                                                                                                   |
| 12 | 53189413  | ACCAAAGCC<br>ACCAGCCCC<br>T | A                        | KRT3   | NM_057088                                                     | KRT3:NM_057088:exon1:c.396_413del:p.132_138del                                                                                             |
| 12 | 53449383  | C                           | CAA                      | TENC1  | NM_015319,NM_170754,NM_198316                                 | TNS2:NM_015319:exon9:c.635_636insAA:p.A212fs,TNS2:NM_170754:exon9:c.605_606insAA:p.A202fs,TNS2:NM_198316:exon9:c.233_234insAA:p.A78fs      |
| 12 | 56863284  | C                           | CCG                      | SPRYD4 | NM_207344                                                     | SPRYD4:NM_207344:exon2:c.547_548insCG:p.P183fs                                                                                             |
| 12 | 76424937  | TTGC                        | T                        | PHLDA1 | NM_007350                                                     | PHLDA1:NM_007350:exon1:c.582_584del:p.194_195del                                                                                           |
| 12 | 91347581  | C                           | CTCT                     | CCER1  | NM_152638                                                     | CCER1:NM_152638:exon1:c.938_939insAGA:p.E313delinsEE                                                                                       |
| 12 | 118198812 | T                           | TGC                      | KSR2   | NM_173598                                                     | .                                                                                                                                          |
| 12 | 118506324 | ATCTTCC                     | A                        | VSIG10 | NM_019086                                                     | VSIG10:NM_019086:exon8:c.1419_1424del:p.473_475del                                                                                         |
| 12 | 121678327 | C                           | CTTT                     | CAMKK2 | NM_001270486                                                  | CAMKK2:NM_001270486:exon16:c.1614_1615insAAA:p.G539delinsKG                                                                                |
| 12 | 122064769 | GGGCCCC                     | G                        | ORAI1  | NM_032790                                                     | ORAI1:NM_032790:exon1:c.123_128del:p.41_43del                                                                                              |
| 12 | 122359397 | G                           | GGAGGA<br>GGAGGA<br>GAAA | WDR66  | NM_001178003,NM_144668                                        | WDR66:NM_001178003:exon2:c.186_187insGAGGAGGAGGAGAAA:p.G62delinsGEEEEK,WDR66:NM_144668:exon2:c.186_187insGAGGAGGAGGAGAAA:p.G62delinsGEEEEK |
| 12 | 125478381 | C                           | CCTG                     | BRI3BP | NM_080626                                                     | BRI3BP:NM_080626:exon1:c.45_46insCTG:p.L15delinsLL                                                                                         |
| 13 | 32360777  | A                           | AGC                      | RXFP2  | NM_001166058,NM_130806                                        | .                                                                                                                                          |
| 13 | 38932224  | ATTTAG                      | A                        | UFM1   | NM_001286703,NM_001286704,NM_001286705,NM_001286706,NM_016617 | .                                                                                                                                          |
| 13 | 40298638  | TA                          | T                        | COG6   | NM_001145079,NM_020751                                        | .                                                                                                                                          |
| 13 | 43462431  | G                           | GATTC                    | EPSTI1 | NM_001002264                                                  | EPSTI1:NM_001002264:exon13:c.1187_1188insG                                                                                                 |

|    |           |                             |      |        |                                     |                                                                                                                                                                |
|----|-----------|-----------------------------|------|--------|-------------------------------------|----------------------------------------------------------------------------------------------------------------------------------------------------------------|
|    |           |                             |      |        |                                     | AAAT:p.L396fs                                                                                                                                                  |
| 13 | 53029770  | CGCGGTGGC<br>GGTGGCGGT<br>G | C    | CKAP2  | NM_001098525,NM_001286687,NM_018204 | .                                                                                                                                                              |
| 13 | 72440658  | TGCCGCC                     | T    | DACH1  | NM_004392,NM_080759,NM_080760       | DACH1:NM_004392:exon1:c.244_249del:p.82_83del,DACH1:NM_080759:exon1:c.244_249del:p.82_83del,DACH1:NM_080760:exon1:c.244_249del:p.82_83del                      |
| 13 | 78272267  | T                           | TGG  | SLAIN1 | NM_001242868                        | SLAIN1:NM_001242868:exon1:c.219_220insGG:p.A73fs                                                                                                               |
| 13 | 98658610  | ATTTTTTTTT<br>TTTTTTT       | A    | IPO5   | NM_002271                           | .                                                                                                                                                              |
| 13 | 98658610  | ATTTTTTTTT<br>TTTTTTT       | A    | IPO5   | NM_002271                           | .                                                                                                                                                              |
| 13 | 98658610  | ATTTTTTTTT<br>TTTTTTT       | A    | IPO5   | NM_002271                           | .                                                                                                                                                              |
| 13 | 100635034 | A                           | ACCC | ZIC2   | NM_007129                           | ZIC2:NM_007129:exon1:c.716_717insCCC:p.H239delinsHP                                                                                                            |
| 13 | 113973924 | A                           | ATT  | LAMP1  | NM_005561                           | LAMP1:NM_005561:exon5:c.703_704insTT:p.S235fs                                                                                                                  |
| 14 | 20666175  | C                           | CA   | OR11G2 | NM_001005503                        | OR11G2:NM_001005503:exon1:c.682dupA:p.C227fs                                                                                                                   |
| 14 | 23371282  | CAGT                        | C    | RBM23  | NM_001077351,NM_001077352,NM_018107 | RBM23:NM_001077352:exon10:c.1048_1050del:p.350_350del,RBM23:NM_018107:exon11:c.1102_1104del:p.368_368del,RBM23:NM_001077351:exon12:c.1150_1152del:p.384_384del |
| 14 | 24646406  | G                           | GGAA | REC8   | NM_001048205,NM_005132              | REC8:NM_001048205:exon8:c.681_682insGAA:p.E227delinsEE,REC8:NM_005132:exon9:c.681_682insGAA:p.E227delinsEE                                                     |
| 14 | 25326229  | T                           | TGC  | STXBP6 | NM_001304476,NM_001304477,NM_014178 | .                                                                                                                                                              |
| 14 | 71275773  | GCCT                        | G    | MAP3K9 | NM_001284230,NM_033141              | MAP3K9:NM_001284230:exon1:c.113_115del:p.38_39del,MAP3K9:NM_033141:exon1:c.113_115del                                                                          |



|    |           |                      |      |          |                                                               |                                                                                                                                                                                                                        |
|----|-----------|----------------------|------|----------|---------------------------------------------------------------|------------------------------------------------------------------------------------------------------------------------------------------------------------------------------------------------------------------------|
|    |           |                      |      |          |                                                               | l:p.38_39del                                                                                                                                                                                                           |
| 14 | 77493644  | CGCAGCGGC<br>GGCGGCG | C    | IRF2BPL  | NM_024496                                                     | IRF2BPL:NM_024496:exon1:c.477_491del:p.159_164del                                                                                                                                                                      |
| 14 | 77493791  | CTGT                 | C    | IRF2BPL  | NM_024496                                                     | IRF2BPL:NM_024496:exon1:c.342_344del:p.114_115del                                                                                                                                                                      |
| 14 | 93154537  | TGGC                 | T    | RIN3     | NM_024832                                                     | RIN3:NM_024832:exon10:c.2899_2901del:p.967_967del                                                                                                                                                                      |
| 14 | 95903307  | TAGA                 | T    | SYNE3    | NM_152592                                                     | SYNE3:NM_152592:exon14:c.2385_2387del:p.795_796del                                                                                                                                                                     |
| 14 | 104570772 | CTG                  | C    | ASPG     | NM_001080464                                                  | ASPG:NM_001080464:exon8:c.886_887del:p.C296fs                                                                                                                                                                          |
| 15 | 23685004  | G                    | GCAT | GOLGA6L2 | NM_001304388                                                  | GOLGA6L2:NM_001304388:exon8:c.2617_2618insATG:p.A873delinsDA                                                                                                                                                           |
| 15 | 38776806  | AGGTGGTGG<br>T       | A    | FAM98B   | NM_173611                                                     | FAM98B:NM_173611:exon8:c.1249_1257del:p.417_419del                                                                                                                                                                     |
| 15 | 50888582  | T                    | TA   | TRPM7    | NM_001301212,NM_017672                                        | .                                                                                                                                                                                                                      |
| 15 | 50901929  | TA                   | T    | TRPM7    | NM_001301212,NM_017672                                        | .                                                                                                                                                                                                                      |
| 15 | 63950739  | T                    | TGC  | HERC1    | NM_003922                                                     | .                                                                                                                                                                                                                      |
| 15 | 81592161  | G                    | GCCT | IL16     | NM_001172128,NM_004513,NM_172217                              | IL16:NM_004513:exon2:c.391_392insCCT:p.A131delinsAS,IL16:NM_172217:exon13:c.2494_2495insCCT:p.A832delinsAS,IL16:NM_001172128:exon14:c.2494_2495insCCT:p.A832delinsAS                                                   |
| 15 | 82533666  | C                    | CAA  | EFTUD1   | NM_001040610,NM_024580                                        | EFTUD1:NM_001040610:exon3:c.169_170insTT:p.R57fs,EFTUD1:NM_024580:exon5:c.322_323insTT:p.R108fs                                                                                                                        |
| 15 | 89876827  | T                    | TTGC | POLG     | NM_001126131,NM_002693                                        | POLG:NM_001126131:exon2:c.158_159insGCA:p.Q53delinsQQ,POLG:NM_002693:exon2:c.158_159insGCA:p.Q53delinsQQ                                                                                                               |
| 15 | 100252709 | CCAG                 | C    | MEF2A    | NM_001130926,NM_001130927,NM_001130928,NM_001171894,NM_005587 | MEF2A:NM_001130928:exon8:c.1024_1026del:p.342_342del,MEF2A:NM_001130926:exon10:c.1228_1230del:p.410_410del,MEF2A:NM_001130927:exon10:c.1048_1050del:p.350_350del,MEF2A:NM_005587:exon11:c.1234_1236del:p.412_412del,ME |

|    |           |                |                                   |        |                                                                  |                                                                                                                                                                                                                                                                           |
|----|-----------|----------------|-----------------------------------|--------|------------------------------------------------------------------|---------------------------------------------------------------------------------------------------------------------------------------------------------------------------------------------------------------------------------------------------------------------------|
|    |           |                |                                   |        |                                                                  | F2A:NM_001171894:exon12:c.1228_1230del:p.410_410del                                                                                                                                                                                                                       |
| 15 | 100252735 | AGCAGCAGC<br>C | A                                 | MEF2A  | NM_001130926,NM_001130927,NM_001130928,NM_001171894,NM_005587    | MEF2A:NM_001130928:exon8:c.1050_1058del:p.350_353del,MEF2A:NM_001130926:exon10:c.1254_1262del:p.418_421del,MEF2A:NM_001130927:exon10:c.1074_1082del:p.358_361del,MEF2A:NM_005587:exon11:c.1260_1268del:p.420_423del,MEF2A:NM_001171894:exon12:c.1254_1262del:p.418_421del |
| 15 | 102359306 | C              | CTT                               | OR4F15 | NM_001001674                                                     | OR4F15:NM_001001674:exon1:c.917_918insTT:p.A306fs                                                                                                                                                                                                                         |
| 16 | 138709    | C              | CAA                               | NPRL3  | NM_001039476,NM_001077350,NM_001243247,NM_001243248,NM_001243249 | UNKNOWN                                                                                                                                                                                                                                                                   |
| 16 | 2821988   | TC             | T                                 | TCEB2  | NM_207013                                                        | .                                                                                                                                                                                                                                                                         |
| 16 | 3707798   | A              | ATGGCCT<br>GAGTGA<br>CCAAC<br>TGG | DNASE1 | NM_005223                                                        | DNASE1:NM_005223:exon8:c.782_783insTGGCCTGAGTGACCAACTGG:p.Y261fs                                                                                                                                                                                                          |
| 16 | 12009530  | C              | CCCG                              | GSPT1  | NM_001130006,NM_002094                                           | GSPT1:NM_001130006:exon1:c.47_48insCGG:p.G16delinsGG,GSPT1:NM_002094:exon1:c.47_48insCGG:p.G16delinsGG                                                                                                                                                                    |
| 16 | 23713469  | T              | TGC                               | ERN2   | NM_033266                                                        | .                                                                                                                                                                                                                                                                         |
| 16 | 24564879  | GTA            | G                                 | RBBP6  | NM_006910,NM_018703                                              | .                                                                                                                                                                                                                                                                         |
| 16 | 48130771  | CA             | C                                 | ABCC12 | NM_033226                                                        | ABCC12:NM_033226:exon22:c.3080delT:p.L1027fs                                                                                                                                                                                                                              |
| 16 | 51175643  | T              | TGCC                              | SALL1  | NM_001127892,NM_002968                                           | SALL1:NM_001127892:exon2:c.198_199insGGC:p.S67delinsGS,SALL1:NM_002968:exon2:c.489_490insGGC:p.S164delinsGS                                                                                                                                                               |
| 16 | 51175655  | C              | CGCT                              | SALL1  | NM_001127892,NM_002968                                           | SALL1:NM_001127892:exon2:c.186_187insAGC:p.G63delinsSG,SALL1:NM_002968:exon2:c.477_478insAGC:p.G160delinsSG                                                                                                                                                               |
| 16 | 51175663  | C              | CTGA                              | SALL1  | NM_001127892,NM_002968                                           | SALL1:NM_001127892:exon2:c.178_179insTCA:                                                                                                                                                                                                                                 |

|    |          |                  |                |          |                                                                            |                                                                                                                                       |
|----|----------|------------------|----------------|----------|----------------------------------------------------------------------------|---------------------------------------------------------------------------------------------------------------------------------------|
|    |          |                  |                |          |                                                                            | p.S60delinsIS,SALL1:NM_002968:exon2:c.469_470insTCA:p.S157delinsIS                                                                    |
| 16 | 57732067 | G                | GGC            | DRC7     | NM_001289162,NM_001289163,NM_032269                                        | .                                                                                                                                     |
| 16 | 67229833 | C                | CAACAGT        | E2F4     | NM_001950                                                                  | E2F4:NM_001950:exon7:c.957_958insAACAGT:p.S319delinsSNS                                                                               |
| 16 | 67229844 | G                | GTAA           | E2F4     | NM_001950                                                                  | E2F4:NM_001950:exon7:c.968_969insTAA:p.S323delinsSN                                                                                   |
| 16 | 67702197 | G                | GGAGGCA        | C16orf86 | NM_001012984                                                               | C16orf86:NM_001012984:exon4:c.648_649insGAGGCA:p.V216delinsVEA                                                                        |
| 16 | 70896015 | GA               | G              | HYDIN    | NM_001270974                                                               | HYDIN:NM_001270974:exon69:c.11712delT:p.I3904fs                                                                                       |
| 16 | 70954703 | GGCGCTCCTTCTCCGT | G              | HYDIN    | NM_001270974                                                               | HYDIN:NM_001270974:exon46:c.7561_7575del:p.S2521_2525del                                                                              |
| 16 | 71956588 | GTATA            | G              | IST1     | NM_001270975,NM_001270976,NM_001270977,NM_001270978,NM_001270979,NM_014761 | .                                                                                                                                     |
| 16 | 71956592 | A                | AAGTGTG        | IST1     | NM_001270975,NM_001270976,NM_001270977,NM_001270978,NM_001270979,NM_014761 | .                                                                                                                                     |
| 16 | 71981414 | C                | CTTTG          | PKD1L3   | NM_181536                                                                  | UNKNOWN                                                                                                                               |
| 16 | 71981418 | G                | GT             | PKD1L3   | NM_181536                                                                  | UNKNOWN                                                                                                                               |
| 16 | 72821593 | A                | AGCCGC<br>CGCC | ZFHX3    | NM_001164766,NM_006885                                                     | ZFHX3:NM_001164766:exon9:c.7839_7840insGGCGGCGGC:p.S2614delinsGGGS,ZFHX3:NM_006885:exon10:c.10581_10582insGGCGGCGGC:p.S3528delinsGGGS |
| 16 | 72821618 | ACCG             | A              | ZFHX3    | NM_001164766,NM_006885                                                     | ZFHX3:NM_001164766:exon9:c.7812_7814del:p.S2604_2605del,ZFHX3:NM_006885:exon10:c.10554_10556del:p.S3518_3519del                       |
| 16 | 72821618 | A                | ACCG           | ZFHX3    | NM_001164766,NM_006885                                                     | ZFHX3:NM_001164766:exon9:c.7814_7815insCGG:p.G2605delinsGG,ZFHX3:NM_006885:exon10:c.10556_10557insCGG:p.G3519delinsGG                 |
| 16 | 87637893 | C                | CCTG           | JPH3     | NM_001271604                                                               | JPH3:NM_001271604:exon2:c.430_431insCTG:p.                                                                                            |

|    |          |         |            |                  |                                                   |                                                                                                 |
|----|----------|---------|------------|------------------|---------------------------------------------------|-------------------------------------------------------------------------------------------------|
|    |          |         |            |                  |                                                   | P144delinsPA                                                                                    |
| 16 | 88599699 | CCTCTGG | C          | ZFPM1            | NM_153813                                         | ZFPM1:NM_153813:exon10:c.1334_1339del:p.445_447del                                              |
| 16 | 88952507 | C       | CA         | CBFA2T3          | NM_005187,NM_175931                               | CBFA2T3:NM_175931:exon5:c.496_497insT:p.R166fs, CBFA2T3:NM_005187:exon6:c.754_755insT:p.R252fs  |
| 17 | 4439731  | G       | GA         | SPNS2            | NM_001124758                                      | .                                                                                               |
| 17 | 6928035  | C       | CAGA       | BCL6B            | NM_181844                                         | BCL6B:NM_181844:exon4:c.717_718insAGA:p.S239delinsSR                                            |
| 17 | 7470285  | CA      | C          | SEN3-EIF4A1,SEN3 | NR_037926;NM_015670                               | .                                                                                               |
| 17 | 7750177  | T       | TACCACCACC | KDM6B            | NM_001080424                                      | KDM6B:NM_001080424:exon9:c.752_753insACCACCACC:p.L251delinsLPPP                                 |
| 17 | 7750177  | T       | TACCACC    | KDM6B            | NM_001080424                                      | KDM6B:NM_001080424:exon9:c.752_753insACCACC:p.L251delinsLPP                                     |
| 17 | 7918802  | C       | CTT        | GUCY2D           | NM_000180                                         | GUCY2D:NM_000180:exon15:c.2926_2927insTT:p.R976fs                                               |
| 17 | 12903598 | G       | GGAGA      | ELAC2            | NM_001165962,NM_018127,NM_173717                  | .                                                                                               |
| 17 | 17039561 | CCAG    | C          | MPRIP            | NM_015134,NM_201274                               | MPRIP:NM_015134:exon6:c.534_536del:p.178_179del,MPRIP:NM_201274:exon6:c.534_536del:p.178_179del |
| 17 | 17039561 | CCAGCAG | C          | MPRIP            | NM_015134,NM_201274                               | MPRIP:NM_015134:exon6:c.534_539del:p.178_180del,MPRIP:NM_201274:exon6:c.534_539del:p.178_180del |
| 17 | 17697093 | CCAG    | C          | RAI1             | NM_030665                                         | RAI1:NM_030665:exon3:c.832_834del:p.278_278del                                                  |
| 17 | 26092619 | T       | TG         | NOS2             | NM_000625                                         | NOS2:NM_000625:exon20:c.2369_2370insC:p.R790fs                                                  |
| 17 | 35601496 | A       | AT         | ACACA            | NM_198834,NM_198836,NM_198837,NM_198838,NM_198839 | .                                                                                               |
| 17 | 41121205 | TGG     | T          | PTGES3L          | NM_001142653,NM_001142654,NM_001261430            | .                                                                                               |

|    |          |                   |                       |         |                                                                            |                                                                                                                                                                                                                                                                                                              |
|----|----------|-------------------|-----------------------|---------|----------------------------------------------------------------------------|--------------------------------------------------------------------------------------------------------------------------------------------------------------------------------------------------------------------------------------------------------------------------------------------------------------|
| 17 | 41121208 | GGGC              | G                     | PTGES3L | NM_001142653,NM_001142654,NM_01261430                                      | .                                                                                                                                                                                                                                                                                                            |
| 17 | 41121209 | GGC               | G                     | PTGES3L | NM_001142653,NM_001142654,NM_01261430                                      | .                                                                                                                                                                                                                                                                                                            |
| 17 | 43319434 | TCCGCCG           | T                     | FMNL1   | NM_005892                                                                  | FMNL1:NM_005892:exon15:c.1807_1812del:p.603_604del                                                                                                                                                                                                                                                           |
| 17 | 56321451 | GACAC             | G                     | LPO     | NM_006151                                                                  | .                                                                                                                                                                                                                                                                                                            |
| 17 | 56321451 | G                 | GAC                   | LPO     | NM_006151                                                                  | .                                                                                                                                                                                                                                                                                                            |
| 17 | 58153482 | C                 | CA                    | HEATR6  | NM_022070                                                                  | .                                                                                                                                                                                                                                                                                                            |
| 17 | 65955758 | T                 | TCCTCCAGCC            | BPTF    | NM_004459,NM_182641                                                        | BPTF:NM_182641:exon24:c.8028_8029insCCTC CAGCC:p.A2676delinsAPPA,BPTF:NM_004459:exon26:c.7977_7978insCCTCCAGCC:p.A2659delinsAPPA                                                                                                                                                                             |
| 17 | 72889676 | G                 | GGGCTC CGTAGGT TCCATC | FADS6   | NM_178128                                                                  | FADS6:NM_178128:exon1:c.17_18insGATGGAA CCTACGGAGCC:p.P6delinsPMEPTEP                                                                                                                                                                                                                                        |
| 17 | 74084982 | A                 | ATT                   | EXOC7   | NM_001013839,NM_001145297,NM_001145298,NM_001145299,NM_001282313,NM_015219 | EXOC7:NM_001282313:exon8:c.946_947insAA:p.L316fs,EXOC7:NM_015219:exon8:c.976_977insAA:p.L326fs,EXOC7:NM_001013839:exon9:c.1069_1070insAA:p.L357fs,EXOC7:NM_001145298:exon9:c.1045_1046insAA:p.L349fs,EXOC7:NM_001145297:exon10:c.1222_1223insAA:p.L408fs,EXOC7:NM_001145299:exon10:c.1138_1139insAA:p.L380fs |
| 17 | 79614931 | TTTAA             | T                     | TSPAN10 | NM_001290212,NM_031945                                                     | .                                                                                                                                                                                                                                                                                                            |
| 17 | 80048295 | C                 | CA                    | FASN    | NM_004104                                                                  | FASN:NM_004104:exon11:c.1825dupT:p.C609fs                                                                                                                                                                                                                                                                    |
| 18 | 12819215 | TTA               | T                     | PTPN2   | NM_001207013                                                               | PTPN2:NM_001207013:exon6:c.560_561del:p.L187fs                                                                                                                                                                                                                                                               |
| 18 | 22642709 | TAAATAACAA AAAAAA | T                     | ZNF521  | NM_015461                                                                  | .                                                                                                                                                                                                                                                                                                            |
| 18 | 28739495 | C                 | CAA                   | DSC1    | NM_004948,NM_024421                                                        | .                                                                                                                                                                                                                                                                                                            |
| 18 | 43319588 | G                 | GC                    | SLC14A1 | NM_001128588,NM_001146036,NM_001146037,NM_015865                           | SLC14A1:NM_001146037:exon7:c.1076dupC:p.A359fs,SLC14A1:NM_015865:exon8:c.908dupC:p.                                                                                                                                                                                                                          |

|    |          |                 |       |         |                                                               |                                                                                                                                     |
|----|----------|-----------------|-------|---------|---------------------------------------------------------------|-------------------------------------------------------------------------------------------------------------------------------------|
|    |          |                 |       |         |                                                               | A303fs,SLC14A1:NM_001128588:exon9:c.1076dupC:p.A359fs,SLC14A1:NM_001146036:exon9:c.908dupC:p.A303fs                                 |
| 18 | 48723145 | CGCCGCCGC<br>G  | C     | MEX3C   | NM_016626                                                     | MEX3C:NM_016626:exon1:c.537_545del:p.179_182del                                                                                     |
| 18 | 72223591 | G               | GTGC  | CNDP1   | NM_032649                                                     | CNDP1:NM_032649:exon2:c.43_44insTGC:p.V15delinsVL                                                                                   |
| 19 | 1827020  | T               | TGGA  | REXO1   | NM_020695                                                     | REXO1:NM_020695:exon2:c.1767_1768insTCC:p.T590delinsST                                                                              |
| 19 | 3525878  | C               | CAA   | FZR1    | NM_001136197,NM_001136198,NM_016263                           | FZR1:NM_001136197:exon2:c.82_83insAA:p.R28fs,FZR1:NM_001136198:exon2:c.82_83insAA:p.R28fs,FZR1:NM_016263:exon3:c.82_83insAA:p.R28fs |
| 19 | 3623676  | C               | CG    | CACTIN  | NM_001080543,NM_021231                                        | .                                                                                                                                   |
| 19 | 4954679  | G               | GC    | UHRF1   | NM_001048201,NM_001290050,NM_001290051,NM_001290052,NM_013282 | UNKNOWN                                                                                                                             |
| 19 | 10097438 | G               | GAAAA | COL5A3  | NM_015719                                                     | .                                                                                                                                   |
| 19 | 14200106 | TTCTTCA         | T     | SAMD1   | NM_138352                                                     | SAMD1:NM_138352:exon2:c.699_704del:p.233_235del                                                                                     |
| 19 | 15132675 | C               | CTT   | CCDC105 | NM_173482                                                     | CCDC105:NM_173482:exon6:c.1195_1196insTT:p.R399fs                                                                                   |
| 19 | 17397456 | GGTGT           | G     | ANKLE1  | NM_001278444                                                  | ANKLE1:NM_001278444:exon8:c.1889_1892del:p.G630fs                                                                                   |
| 19 | 17397491 | GTGTGTGTGT<br>T | G     | ANKLE1  | NM_001278444                                                  | ANKLE1:NM_001278444:exon8:c.1924_1933del:p.C642fs                                                                                   |
| 19 | 17397495 | GTGTGTT         | G     | ANKLE1  | NM_001278444                                                  | ANKLE1:NM_001278444:exon8:c.1928_1933del:p.643_645del                                                                               |
| 19 | 23938360 | A               | AACAC | ZNF681  | NM_138286                                                     | .                                                                                                                                   |
| 19 | 35084497 | ATCT            | A     | SCGB2B2 | NM_001025591                                                  | SCGB2B2:NM_001025591:exon3:c.251_253del:p.84_85del                                                                                  |
| 19 | 35758275 | G               | GGGA  | LSR     | NM_001260489,NM_001260490,NM_015925,NM_205834,NM_205835       | LSR:NM_001260490:exon6:c.1228_1229insGGA:p.G410delinsGR,LSR:NM_205835:exon7:c.1348                                                  |

|    |          |         |                |         |                                                                                                                                                          |                                                                                                                                                                                                                                                                                                                                                                                                                                                                                                                                                                      |
|----|----------|---------|----------------|---------|----------------------------------------------------------------------------------------------------------------------------------------------------------|----------------------------------------------------------------------------------------------------------------------------------------------------------------------------------------------------------------------------------------------------------------------------------------------------------------------------------------------------------------------------------------------------------------------------------------------------------------------------------------------------------------------------------------------------------------------|
|    |          |         |                |         |                                                                                                                                                          | 1349insGGA:p.G450delinsGR,LSR:NM_001260489:exon8:c.1492_1493insGGA:p.G498delinsGR,LSR:NM_015925:exon8:c.1495_1496insGGA:p.G499delinsGR,LSR:NM_205834:exon9:c.1552_1553insGGA:p.G518delinsGR                                                                                                                                                                                                                                                                                                                                                                          |
| 19 | 39224336 | T       | TC             | CAPN12  | NM_144691                                                                                                                                                | .                                                                                                                                                                                                                                                                                                                                                                                                                                                                                                                                                                    |
| 19 | 50155361 | GCCGCTC | G              | SCAF1   | NM_021228                                                                                                                                                | SCAF1:NM_021228:exon7:c.1716_1721del:p.572_574del                                                                                                                                                                                                                                                                                                                                                                                                                                                                                                                    |
| 19 | 52887145 | TA      | T              | ZNF880  | NM_001145434                                                                                                                                             | ZNF880:NM_001145434:exon4:c.313delA:p.K105fs                                                                                                                                                                                                                                                                                                                                                                                                                                                                                                                         |
| 19 | 52887246 | T       | TCAA           | ZNF880  | NM_001145434                                                                                                                                             | ZNF880:NM_001145434:exon4:c.413_414insCAA:p.I138delinsIN                                                                                                                                                                                                                                                                                                                                                                                                                                                                                                             |
| 19 | 53117636 | GAAGA   | G              | ZNF83   | NM_001105549,NM_001105550,NM_001105551,NM_001105552,NM_001277945,NM_001277946,NM_001277947,NM_001277948,NM_001277949,NM_001277951,NM_001277952,NM_018300 | ZNF83:NM_001277951:exon3:c.178_181del:p.S60fs,ZNF83:NM_018300:exon3:c.178_181del:p.S60fs,ZNF83:NM_001105552:exon4:c.178_181del:p.S60fs,ZNF83:NM_001277946:exon4:c.178_181del:p.S60fs,ZNF83:NM_001105550:exon5:c.178_181del:p.S60fs,ZNF83:NM_001105551:exon5:c.178_181del:p.S60fs,ZNF83:NM_001277948:exon5:c.178_181del:p.S60fs,ZNF83:NM_001277949:exon5:c.178_181del:p.S60fs,ZNF83:NM_001277952:exon5:c.178_181del:p.S60fs,ZNF83:NM_001105549:exon6:c.178_181del:p.S60fs,ZNF83:NM_001277945:exon6:c.178_181del:p.S60fs,ZNF83:NM_001277947:exon6:c.178_181del:p.S60fs |
| 19 | 55324674 | C       | CA             | KIR2DL4 | NM_001080772,NM_002255                                                                                                                                   | KIR2DL4:NM_001080772:exon6:c.802dupA:p.S267fs                                                                                                                                                                                                                                                                                                                                                                                                                                                                                                                        |
| 19 | 55526103 | G       | GCAGA          | GP6     | NM_001083899                                                                                                                                             | GP6:NM_001083899:exon8:c.1209_1210insTCTG:p.P404fs                                                                                                                                                                                                                                                                                                                                                                                                                                                                                                                   |
| 19 | 55790886 | A       | AGCCGC<br>CGCC | HSPBP1  | NM_001130106,NM_001297600,NM_012267                                                                                                                      | HSPBP1:NM_001297600:exon1:c.228_229insGGCGGCGGC:p.S77delinsGGGS,HSPBP1:NM_012267:exon2:c.90_91insGGCGGCGGC:p.S31delinsGGGS,HSPBP1:NM_001130106:exon3:c.90_91insG                                                                                                                                                                                                                                                                                                                                                                                                     |

|    |          |                |                   |          |                                               |                                                                                                                                                                                                       |
|----|----------|----------------|-------------------|----------|-----------------------------------------------|-------------------------------------------------------------------------------------------------------------------------------------------------------------------------------------------------------|
|    |          |                |                   |          |                                               | GCGGCGGC:p.S31delinsGGGS                                                                                                                                                                              |
| 19 | 56126502 | GGCGGCGGC<br>C | G                 | ZNF865   | NM_001195605                                  | ZNF865:NM_001195605:exon1:c.1519_1527del:p.507_509del                                                                                                                                                 |
| 20 | 238435   | CTGGTCT        | C                 | DEFB132  | NM_207469                                     | DEFB132:NM_207469:exon1:c.17_22del:p.6_8del                                                                                                                                                           |
| 20 | 271225   | T              | TA                | C20orf96 | NM_080571,NM_153269                           | .                                                                                                                                                                                                     |
| 20 | 271225   | T              | TTTA              | C20orf96 | NM_080571,NM_153269                           | .                                                                                                                                                                                                     |
| 20 | 271225   | T              | TTA               | C20orf96 | NM_080571,NM_153269                           | .                                                                                                                                                                                                     |
| 20 | 278685   | AGCC           | A                 | ZCCHC3   | NM_033089                                     | ZCCHC3:NM_033089:exon1:c.459_461del:p.153_154del                                                                                                                                                      |
| 20 | 2638898  | CAAG           | C                 | NOP56    | NM_006392                                     | NOP56:NM_006392:exon12:c.1744_1746del:p.582_582del                                                                                                                                                    |
| 20 | 13561632 | T              | TAA               | TASP1    | NM_017714                                     | .                                                                                                                                                                                                     |
| 20 | 31292296 | GAC            | G                 | COMMD7   | NM_001099339,NM_053041                        | .                                                                                                                                                                                                     |
| 20 | 31292298 | CAA            | C                 | COMMD7   | NM_001099339,NM_053041                        | .                                                                                                                                                                                                     |
| 20 | 32664864 | C              | CCAG              | RALY     | NM_007367,NM_016732                           | RALY:NM_007367:exon7:c.641_642insCAG:p.A214delinsAS,RALY:NM_016732:exon8:c.689_690insCAG:p.A230delinsAS                                                                                               |
| 20 | 33507379 | AGTGT          | A                 | ACSS2    | NM_001076552,NM_001242393,NM_018677           | .                                                                                                                                                                                                     |
| 20 | 33507379 | AGTGTGT        | A                 | ACSS2    | NM_001076552,NM_001242393,NM_018677           | .                                                                                                                                                                                                     |
| 20 | 34242573 | GGGCACAGG<br>A | G                 | RBM12    | NM_001198838,NM_001198840,NM_006047,NM_152838 | RBM12:NM_001198840:exon2:c.663_671del:p.221_224del,RBM12:NM_001198838:exon3:c.663_671del:p.221_224del,RBM12:NM_006047:exon3:c.663_671del:p.221_224del,RBM12:NM_152838:exon3:c.663_671del:p.221_224del |
| 20 | 42199704 | G              | GGTGGG<br>TGGGT   | SGK2     | NM_001199264,NM_016276,NM_170693              | .                                                                                                                                                                                                     |
| 20 | 42199704 | G              | GGTGGG<br>TGGGTGT | SGK2     | NM_001199264,NM_016276,NM_170693              | .                                                                                                                                                                                                     |
| 20 | 42199706 | T              | TGGGTG<br>G       | SGK2     | NM_001199264,NM_016276,NM_170693              | .                                                                                                                                                                                                     |



|    |          |                               |                                 |          |                                                             |                                                                                                                                                                                                                           |
|----|----------|-------------------------------|---------------------------------|----------|-------------------------------------------------------------|---------------------------------------------------------------------------------------------------------------------------------------------------------------------------------------------------------------------------|
| 20 | 46279836 | ACAG                          | A                               | NCOA3    | NM_001174087,NM_001174088,NM_006534,NM_181659               | NCOA3:NM_001174087:exon20:c.3760_3762del:p.1254_1254del,NCOA3:NM_001174088:exon20:c.3736_3738del:p.1246_1246del,NCOA3:NM_006534:exon20:c.3751_3753del:p.1251_1251del,NCOA3:NM_181659:exon20:c.3763_3765del:p.1255_1255del |
| 21 | 34721704 | TTCC                          | T                               | IFNAR1   | NM_000629                                                   | IFNAR1:NM_000629:exon8:c.999_1001del:p.333_334del                                                                                                                                                                         |
| 21 | 38569874 | T                             | TGC                             | TTC3     | NM_001001894,NM_003316                                      | TTC3:NM_001001894:exon43:c.5583_5584insGC:p.T1861fs,TTC3:NM_003316:exon43:c.5583_5584insGC:p.T1861fs                                                                                                                      |
| 21 | 40883671 | G                             | GAGA                            | SH3BGR   | NM_001001713,NM_007341                                      | SH3BGR:NM_001001713:exon6:c.356_357insAG A:p.G119delinsGE,SH3BGR:NM_007341:exon6:c.689_690insAGA:p.G230delinsGE                                                                                                           |
| 21 | 43708431 | G                             | GC                              | ABCG1    | NM_004915,NM_016818,NM_207174,NM_207627,NM_207628,NM_207629 | .                                                                                                                                                                                                                         |
| 21 | 46924425 | CGGCCCCCA                     | C                               | COL18A1  | NM_030582,NM_130444,NM_130445                               | COL18A1:NM_030582:exon33:c.3364_3364del:p.G1122fs,COL18A1:NM_130444:exon33:c.4069_4069del:p.G1357fs,COL18A1:NM_130445:exon34:c.2824_2824del:p.G942fs                                                                      |
| 22 | 22868572 | CA                            | C                               | ZNF280A  | NM_080740                                                   | ZNF280A:NM_080740:exon2:c.1382delT:p.L461X                                                                                                                                                                                |
| 22 | 23481133 | GAA                           | G                               | RSPH14   | NM_014433                                                   | .                                                                                                                                                                                                                         |
| 22 | 26879946 | GGAGGCGGC<br>GCCCGGGG<br>GAGA | G                               | SRRD     | NM_001013694                                                | SRRD:NM_001013694:exon1:c.91_111del:p.31_37del                                                                                                                                                                            |
| 22 | 29885567 | A                             | AAAGTC<br>CCCTGA<br>GAAGGC<br>C | NEFH     | NM_021076                                                   | NEFH:NM_021076:exon4:c.1938_1939insAAGTCCCTGAGAAGGCC:p.A646delinsAKSPEKA                                                                                                                                                  |
| 22 | 29885598 | AAGGAAG                       | A                               | NEFH     | NM_021076                                                   | NEFH:NM_021076:exon4:c.1970_1975del:p.657_659del                                                                                                                                                                          |
| 22 | 37964408 | CCAGCGCCT<br>GCTGCAAAC        | C                               | CDC42EP1 | NM_152243                                                   | CDC42EP1:NM_152243:exon3:c.758_778del:p.253_260del                                                                                                                                                                        |

|    |           |                         |                |           |                                         |                                                                                                                                                                            |
|----|-----------|-------------------------|----------------|-----------|-----------------------------------------|----------------------------------------------------------------------------------------------------------------------------------------------------------------------------|
|    |           | CCCT                    |                |           |                                         |                                                                                                                                                                            |
| 22 | 38483174  | A                       | ACATGG<br>AGGT | BAIAP2L2  | NM_025045                               | BAIAP2L2:NM_025045:exon11:c.1215_1216insA<br>CCTCCATG:p.S406delinsTSMS                                                                                                     |
| 22 | 39777824  | A                       | AACC           | SYNGR1    | NM_004711                               | SYNGR1:NM_004711:exon4:c.607_608insACC:p.<br>T203delinsNP                                                                                                                  |
| X  | 8763309   | GCTGCTGCTG<br>CTGCGGCTT | G              | FAM9A     | NM_001171186,NM_174951                  | FAM9A:NM_001171186:exon7:c.623_640del:p.20<br>8_214del,FAM9A:NM_174951:exon7:c.623_640de<br>l:p.208_214del                                                                 |
| X  | 8763327   | T                       | TCTG           | FAM9A     | NM_001171186,NM_174951                  | FAM9A:NM_001171186:exon7:c.622_623insCAG:<br>p.E208delinsAE,FAM9A:NM_174951:exon7:c.622<br>_623insCAG:p.E208delinsAE                                                       |
| X  | 18582646  | GAT                     | G              | CDKL5     | NM_001037343,NM_003159                  | .                                                                                                                                                                          |
| X  | 24382373  | TTGCTGCTGC              | T              | SUPT20HL1 | NM_001136234                            | SUPT20HL1:NM_001136234:exon1:c.1497_1505d<br>el:p.499_502del                                                                                                               |
| X  | 37981355  | AAAG                    | A              | SYTL5     | NM_001163334,NM_001163335,NM_1<br>38780 | SYTL5:NM_001163334:exon15:c.1795_1797del:p.<br>599_599del,SYTL5:NM_138780:exon15:c.1729_1<br>731del:p.577_577del,SYTL5:NM_001163335:exon<br>16:c.1729_1731del:p.577_577del |
| X  | 50121146  | A                       | AG             | DGKK      | NM_001013742                            | UNKNOWN                                                                                                                                                                    |
| X  | 56591830  | CCCCATAGGC<br>CCCATTGGG | C              | UBQLN2    | NM_013444                               | UBQLN2:NM_013444:exon1:c.1525_1542del:p.50<br>9_514del                                                                                                                     |
| X  | 66765158  | T                       | TGCAGC<br>A    | AR        | NM_000044                               | AR:NM_000044:exon1:c.170_171insGCAGCA:p.<br>L57delinsLQQ                                                                                                                   |
| X  | 104464281 | TC                      | T              | TEX13A    | NM_001291277,NM_031274                  | .                                                                                                                                                                          |
| X  | 150349554 | AACCCACCA<br>CTGG       | A              | GPR50     | NM_004224                               | GPR50:NM_004224:exon2:c.1500_1511del:p.500_<br>504del                                                                                                                      |
| X  | 150349557 | CCACCACTG<br>GCCA       | C              | GPR50     | NM_004224                               | GPR50:NM_004224:exon2:c.1503_1514del:p.501_<br>505del                                                                                                                      |
| X  | 152719969 | GGGGA                   | G              | HAUS7     | NM_017518                               | .                                                                                                                                                                          |

**Supplementary Table S5: Candidate variants in transcribed region after further filtered by ModelR and Phenolyzer analysis**

| Reason for exclusion | CHR OM | POS       | REF     | ALT  | GeneName | Func   | Gene                                                 | ExonicFunc              | AAChange                                                                                                                                                                                                                                         |
|----------------------|--------|-----------|---------|------|----------|--------|------------------------------------------------------|-------------------------|--------------------------------------------------------------------------------------------------------------------------------------------------------------------------------------------------------------------------------------------------|
| benign prediction    | X      | 48369847  | G       | A    | PORCN    | exonic | NM_001282167,NM_022825,NM_203473,NM_203474,NM_203475 | missense SNV            | PORCN:NM_203474:exon2:c.G301A:p.V101I,PORCN:NM_001282167:exon3:c.G88A:p.V30I,PORCN:NM_022825:exon3:c.G301A:p.V101I,PORCN:NM_203473:exon3:c.G301A:p.V101I,PORCN:NM_203475:exon3:c.G301A:p.V101I                                                   |
| Sanger Sequencing    | 2      | 233712226 | C       | CGCA | GIGYF2   | exonic | NM_001103146,NM_001103147,NM_001103148,NM_015575     | nonframeshift insertion | GIGYF2:NM_001103148:exon26:c.3611_3612insGCA:p.P1204delinsPQ,GIGYF2:NM_001103146:exon27:c.3629_3630insGCA:p.P1210delinsPQ,GIGYF2:NM_001103147:exon29:c.3692_3693insGCA:p.P1231delinsPQ,GIGYF2:NM_015575:exon29:c.3629_3630insGCA:p.P1210delinsPQ |
| Sanger Sequencing    | 9      | 131020792 | ACCG    | A    | GOLGA2   | exonic | NM_004486                                            | nonframeshift deletion  | GOLGA2:NM_004486:exon21:c.2147_2149del:p.716_717del                                                                                                                                                                                              |
| Sanger Sequencing    | 11     | 6411935   | TGCTGGC | T    | SMPD1    | exonic | NM_000543,NM_01007593                                | nonframeshift deletion  | SMPD1:NM_000543:exon1:c.108_113del:p.36_38del,SMPD1:NM_01007593:exon1:c.108_113del:p.36_38del                                                                                                                                                    |
| Sanger Sequencing    | 11     | 4592706   | T       | TAC  | C11orf40 | exonic | NM_144663                                            | frameshift insertion    | C11orf40:NM_144663:exon4:c.600_601insGT:p.M201fs                                                                                                                                                                                                 |
| NA                   | 2      | 11944690  | A       | C    | LPIN1    | exonic | NM_001261427,NM_001261428,NM_145693                  | missense SNV            | LPIN1:NM_145693:exon15:c.A2047C:p.I683L,LPIN1:NM_001261427:exon16:c.A2065C:p.I689L,LPIN1:NM_001261428:exon17:c.A2302C:p.I768L                                                                                                                    |
| NA                   | 2      | 11955273  | G       | A    | LPIN1    | exonic | NM_001261427,NM_001261428,NM_145693                  | missense SNV            | LPIN1:NM_145693:exon17:c.G2201A:p.R734Q,LPIN1:NM_001261427:exon18:c.G2219A:p.R740Q,LPIN1:NM_001261428:exon19:c.G2456A:p.R819Q                                                                                                                    |
